# Distinguishing among modes of convergent adaptation using population genomic data

Kristin M. Lee<sup>1,2</sup> and Graham Coop<sup>1,2</sup>

<sup>1</sup> Center for Population Biology, University of California, Davis.

<sup>2</sup> Department of Evolution and Ecology, University of California, Davis

To whom correspondence should be addressed: [krmllee@ucdavis.edu](mailto:krmllee@ucdavis.edu), [gmcoop@ucdavis.edu](mailto:gmcoop@ucdavis.edu)

## 1 Abstract

2 Geographically separated populations can convergently adapt to the same selection pressure. Convergent  
3 evolution at the level of a gene may arise via three distinct modes. The selected alleles can (1) have  
4 multiple independent mutational origins, (2) be shared due to shared ancestral standing variation, or (3)  
5 spread throughout subpopulations via gene flow. We present a model-based, statistical approach that utilizes  
6 genomic data to detect cases of convergent adaptation at the genetic level, identify the loci involved and  
7 distinguish among these modes. To understand the impact of convergent positive selection on neutral  
8 diversity at linked loci, we make use of the fact that hitchhiking can be modeled as an increase in the  
9 variance in neutral allele frequencies around a selected site within a population. We build on coalescent  
10 theory to show how shared hitchhiking events between subpopulations act to increase covariance in allele  
11 frequencies between subpopulations at loci near the selected site, and extend this theory under different  
12 models of migration and selection on the same standing variation. We incorporate this hitchhiking effect  
13 into a multivariate normal model of allele frequencies that also accounts for population structure. Based  
14 on this theory, we present a composite-likelihood-based approach that utilizes genomic data to identify loci  
15 involved in convergence, and distinguishes among alternate modes of convergent adaptation. We illustrate  
16 our method on genome-wide polymorphism data from two distinct cases of convergent adaptation. First, we  
17 investigate the adaptation for copper toxicity tolerance in two populations of the common yellow monkey  
18 flower, *Mimulus guttatus*. We show that selection has occurred on an allele that has been standing in these  
19 populations prior to the onset of copper mining in this region. Lastly, we apply our method to data from four  
20 populations of the killifish, *Fundulus heteroclitus*, that show very rapid convergent adaptation for tolerance  
21 to industrial pollutants. Here, we identify a single locus at which both independent mutation events and  
22 selection on an allele shared via gene flow, either slightly before or during selection, play a role in adaptation  
23 across the species' range.

## 24 1 Introduction

25 Convergent adaptive evolution, where selection independently drives the evolution of the same trait, demon-  
26 strates the impressive ability of natural selection to repeatedly shape phenotypic diversity (Losos, 2011).  
27 Many studies have revealed cases of repeated adaptation resulting from changes in the same molecular  
28 mechanisms across distinct lineages (Stern, 2013; Wood et al., 2005). Here, we use the term convergence to  
29 define all cases of repeated evolution of similar traits across independent lineages, and do not distinguish  
30 between convergent and parallel evolution (Arendt and Reznick, 2008). In some cases, these convergent  
31 adaptive changes are identical at the level of the same orthologous gene or nucleotide (Martin and Or-  
32 gogozo, 2013), suggesting adaptation may be more predictable and constrained than previously appreciated.  
33 Studying repeated evolution has long played a key role in evolutionary biology as a set of replicated natural  
34 experiments to help build comparative arguments for traits as adaptations, and to identify and understand  
35 the ecological and molecular basis of adaptive traits (Harvey and Pagel, 1991).

36 While we often think of convergent evolution among long-separated species, populations of the same  
37 (or closely-related) species often repeatedly evolve similar traits in response to similar selective pressures  
38 (Arendt and Reznick, 2008). Convergent adaptation at the genetic level among closely related populations  
39 may arise via multiple, distinct modes (see Stern, 2013, for a recent review). Selected alleles present at the  
40 same loci in multiple populations can have multiple independent mutational origins (e.g. Pearce et al., 2009;  
41 Chan et al., 2010; Tishkoff et al., 2007). Alternatively, adaptation in different populations could proceed  
42 by means of selection on the standing variation present in their ancestor (e.g. Colosimo et al., 2005; Roesti  
43 et al., 2014), or a single allele spread throughout the populations via gene flow (e.g. Heliconius Genome  
44 Consortium, 2012; Song et al., 2011). Understanding the source of convergent adaptation can aid in our  
45 understanding of fundamental questions about adaptation. Distinguishing among these modes may provide  
46 evidence for how restricted the paths adaptation can take are to pleiotropic constraints and if adaptation is  
47 limited by mutational input (Orr 2005, for review). Additionally, we can improve our understanding of the  
48 role of standing variation and gene flow in adaptation (Barrett and Schluter, 2008; Hedrick, 2013; Welch and  
49 Jiggins, 2014).

50 With the advent of population genomic data, it is now possible to detect genomic regions putatively  
51 underlying recent convergent adaptations. A growing number of studies are sequencing population genomic  
52 data from closely related populations, in which some have potentially converged on an adaptive phenotype  
53 (e.g. Turner et al., 2010; Jones et al., 2012). Population genomic studies of convergent evolution often  
54 take a paired population design, sampling multiple pairs of populations that independently differ in the  
55 key phenotype or environment. These studies are usually predicated on finding large effect loci which have  
56 rapidly increased from low frequency to identify the population genomic signal of selective sweeps shared  
57 across populations that independently share a selective pressure. Regions underlying convergent adaptations  
58 can potentially be identified by looking for genomic regions where multiple pairs of populations are strongly  
59 differentiated (e.g. using  $F_{ST}$ ) compared to the genomic background. Another broad set of approaches  
60 identify convergent loci by looking for genomic regions where the populations that share an environment  
61 cluster together phylogenetically in a way unpredicted by genome-wide patterns or geography (e.g. Pease  
62 et al., 2016; Jones et al., 2012). While these methods have proven useful in identifying loci involved in  
63 convergent adaptation, currently there are few model-based ways to identify the signal of convergence in  
64 population genomic data or to distinguish the different modes of convergent adaptation. In the case where  
65 an allele is shared due to adaptation from standing variation or migration, chunks of the haplotype on which  
66 the selected allele arose and swept on will also be shared among the populations (Slatkin and Wiehe, 1998;  
67 Bierne, 2010; Kim and Maruki, 2011; Roesti et al., 2014), providing a useful heuristic for these modes to  
68 be distinguished from convergent sweeps from independent mutations. We also note there are a variety of  
69 approaches to detect introgression (see Hedrick, 2013; Racimo et al., 2015; Rosenzweig et al., 2016, for recent  
70 reviews). However, these methods are not usually focused on detecting sweeps in both populations, but  
71 rather look for signatures of unusual amounts of shared ancestry between populations. Here, we present  
72 coalescent theory that leverages these signatures selection has on linked neutral variation in a model-based  
73 approach. We extend this to a statistical method that utilizes genomic data to identify loci involved in and  
74 distinguish between modes of genotypic convergence.

75 Positive selection impacts neutral diversity at linked loci due to hitchhiking (Maynard Smith and Haigh,  
76 1974; Kaplan et al., 1989) and can be modeled as an increase in the variance in neutral allele frequencies  
77 around their ancestral frequencies. We develop coalescent theory to show how shared hitchhiking events  
78 between subpopulations act to increase covariance in allele frequencies around their ancestral frequencies  
79 at loci near the selected site, and extend this theory under different models of migration and selection  
80 on the same standing variation. We incorporate this hitchhiking effect into a multivariate normal model  
81 of allele frequencies that also accounts for population structure, allowing for the application to data from  
82 many populations with arbitrary relationships. Based on this theory, we present a composite-likelihood-  
83 based approach (Kim and Stephan, 2002; Nielsen et al., 2005; Chen et al., 2010; Racimo, 2016) that utilizes  
84 genomic single-nucleotide polymorphism (SNP) data to identify loci involved in convergence, and distinguish  
85 among alternate modes of convergent adaptation. As these models are also specified by relevant parameters,  
86 it is possible to obtain estimates for parameters of interest such as the strength of selection, the minimum age  
87 and frequency of a standing variant, and the source population of the beneficial allele in cases of migration.  
88 We also present a parametric-bootstrapping approach to help with model choice and construct confidence  
89 intervals for our parameters as standard likelihood approaches are not applicable to composite likelihoods.

90 This method should be of wide use with the increase in population genomic samples from across the  
91 geographic range of a species. Here, we illustrate the utility of our inference method by applying it to  
92 genome-wide polymorphism data from two distinct cases of convergent adaptation. First, we investigate the  
93 basis of the convergent adaptation observed across populations of the annual wildflower *Mimulus guttatus* to  
94 copper contaminated soils from two populations sampled near Copperopolis, California (Wright et al., 2015).  
95 We find selection has been acting on standing variation shared between these populations for a tolerance  
96 allele present prior to the onset of copper mining in this region. To further exemplify the flexibility of our  
97 method, we study a more complex population scenario: the rapid adaptation of four populations of killifish  
98 (*Fundulus heteroclitus*) to high levels of pollution, sampled across the Eastern seaboard of the United States  
99 (Reid et al., 2016). We find that even at the level of a single gene, both convergent mutation and selection  
100 on an allele shared via gene flow, either slightly before or during selection, have played a role in adaptation  
101 in this species.

## 102 2 Models

103 In the following section, we present models for the three modes of genotypic convergent adaptation: (1)  
104 multiple independent mutations at the same locus, (2) selection on shared ancestral standing variation, and  
105 (3) migration between populations spreading a beneficial allele (Figure 2). Throughout this section, we  
106 compare our derived expectations to coalescent simulations using `mssel`, a modified version of `ms` (Hudson,  
107 2002) that allows for the incorporation of selection at a single site. This simulation program takes as input  
108 the frequency trajectory of the selected allele for each population. We simulate stochastic trajectories of  
109 the selected allele in populations following our three modes of convergence (see Appendix A.2 for simulation  
110 details). We focus on a set of four populations as shown in Figure 1 where populations 2 and 3 are adapted  
111 to a shared novel selection pressure and populations 1 and 4 are in the ancestral environment. The average  
112 coancestry coefficient values across simulations, estimated as described in Appendix A.1, are plotted for 100  
113 bins of recombination distance away from the selected site, which occurs at distance 0. The results for all  
114 three models are shown in dashed lines in Figure 3.

### 115 2.1 Null Model

116 We aim to model the variances and covariances of the neutral allele frequencies within and between popula-  
117 tions due to convergent sweeps. First, we must specify a null model that accounts for population structure.  
118 Populations will have some level of shared deviations away from an ancestral allele frequency,  $\epsilon$ , due to shared  
119 genetic drift. Let  $x_i$  represent the present day allele frequency in population  $i$  (Figure 1). We denote the  
120 deviation of this frequency from the ancestral frequency by  $\Delta x_i = x_i - \epsilon$ . Genetic drift, in expectation across  
121 loci, does not change the population allele frequencies (i.e.  $\mathbb{E}[\Delta x_i] = 0$ ) as an allele increases or decreases  
122 in frequency with equal probability. Drift however does act to increase the variance in this deviation across  
123 loci, with this variance increasing as more time is allowed for drift. The variance in the change of neutral  
124 allele frequencies in population  $i$  is

$$\text{Var}[\Delta x_i] = \mathbb{E}[\Delta x_i^2] = \epsilon(1 - \epsilon)f_{ii} \quad (1)$$

125 where  $f_{ii}$  can be thought of as the genetic drift branch length leading from the ancestral population to  
126 population  $i$  (Nicholson et al., 2002), specifying how much allele frequencies in population  $i$  deviate from  
127 their ancestral values (Figure 1). By rearranging Equation 1,  $f_{ii}$  can be interpreted as the population-specific  
128  $F_{ST}$  for population  $i$  relative to the total population, here represented by the ancestral population (Wright,  
129 1943, 1951; Weir and Hill, 2002; Nicholson et al., 2002).

130 Populations covary in their deviations from  $\epsilon$  as some populations are more closely related due to shared  
131 genetic drift resulting from shared population history or gene flow. The covariance in this deviation between  
132 populations  $i$  and  $j$  is

$$\text{Cov}[\Delta x_i, \Delta x_j] = \mathbb{E}[\Delta x_i \Delta x_j] = \epsilon(1 - \epsilon)f_{ij} \quad (2)$$

133 where  $f_{ij}$  is interpreted as the coancestry coefficient between populations  $i$  and  $j$ , and can be thought of as  
134 the shared branch length connecting  $i$  and  $j$  to the ancestral population (Figure 1).

135 Other natural interpretations of  $f_{ii}$  and  $f_{ij}$  follow from these definitions. Specifically, these values are  
 136 probabilities of a pair of lineages being identical by descent relative to the ancestral population, i.e. the  
 137 probability two sampled lineages coalesce before reaching the ancestral population (see Thompson, 2013, for  
 138 a recent review). We briefly review this coalescent interpretation in Appendix A.1. For  $f_{ii}$  these two lineages  
 139 are sampled both from population  $i$ . For  $f_{ij}$ , one lineage is sampled from population  $i$  and the other from  
 140 population  $j$ . We note that in practice we do not get to observe the ancestral frequency, nor may the history  
 141 of our populations be well represented by a tree-like structure (for instance the history of our populations  
 142 may be reticulated). However, for the sake of clarity, we proceed with these assumptions and deal with these  
 143 complications in the implementation of the method.

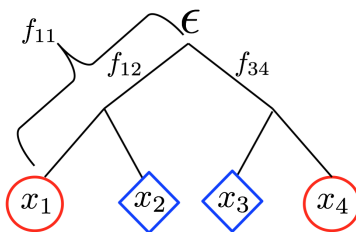

Figure 1: Present day population allele frequencies at a given neutral locus ( $x_1$ – $x_4$  for populations 1–4, respectively) are derived from ancestral allele frequency  $\epsilon$ . Each population has a coancestry coefficient proportional to the amount of drift experienced since the split from the ancestral population.  $f_{11}$  is shown for population 1. Here, populations 1 and 2, and 3 and 4 share drift relative to the ancestral population and have nonzero coancestry coefficients  $f_{12}$  and  $f_{34}$ , respectively. Blue diamonds represent the novel selective environment and red circles the ancestral environment. Note that branch lengths are not proportional to time in generations (unless there is no migration and the amount of drift is small).

We define a matrix,  $\mathbf{F}$ , for  $K$  populations as a  $K \times K$  matrix of coancestry coefficients. For example, for the four populations shown in Figure 1, this matrix takes the following form:

$$\mathbf{F} = \begin{bmatrix} f_{11} & f_{12} & 0 & 0 \\ f_{12} & f_{22} & 0 & 0 \\ 0 & 0 & f_{33} & f_{34} \\ 0 & 0 & f_{34} & f_{44} \end{bmatrix}$$

144 Populations  $i$  and  $j$  that split after the ancestral population and share no additional drift (e.g. populations  
 145 1 and 3) have  $f_{ij} = 0$  by definition.

## 146 2.2 Incorporating selection

147 Positive selection impacts neutral diversity at linked loci due to hitchhiking. As the beneficial allele increases  
 148 rapidly in frequency, so does the haplotype on which it arose. Neutral alleles further from the selected site  
 149 may recombine off the selected background during the sweep, whose duration depends on the strength of  
 150 selection ( $s$ ) and weakly on the effective population size ( $N_e$ ). The effect of hitchhiking on the changes of  
 151 linked neutral allele frequencies is similar to that of genetic drift. Hitchhiking does not alter the expected  
 152 frequency change of linked neutral alleles across loci (i.e.  $\mathbb{E}[\Delta x_i] = 0$ ) because the selected mutation arises  
 153 on a random haplotypic background. Moreover, hitchhiking increases the variance in the deviation in neu-  
 154 tral allele frequencies away from their ancestral values ( $\text{Var}[\Delta x_i]$ ) at linked sites (Gillespie, 2000). Shared  
 155 hitchhiking events between subpopulations will act to increase covariance in allele frequency deviations be-  
 156 tween subpopulations ( $\text{Cov}[\Delta x_i, \Delta x_j]$ ) at loci near the selected site. This effect of hitchhiking on linked  
 157 diversity, within and among populations gives us a way to distinguish among alternate modes of convergent  
 158 adaptation.

159 We define new matrices of coancestry coefficients that incorporate selection in addition to drift as  $\mathbf{F}^{(s)}$ .  
 160 In the following section, we use a coalescent approach to derive coancestry coefficients within and between

161 populations,  $f_{ii}^{(S)}$  and  $f_{ij}^{(S)}$ , for the three modes of genotypic convergent adaptation (Figure 2). In Supplement  
 162 S2 we derive some of the same results forwards in time to help guide the reader’s intuition. For all models,  
 163 we assume the beneficial allele has gone to fixation in all selected populations recently. Note that all our  
 164 models of selection are phrased in terms of distortions to the neutral matrix  $\mathbf{F}$ ; therefore, the precise source  
 165 of the neutral population structure (e.g. whether its due to shared population history or migration) is  
 166 relatively unimportant to our approach. A deeper knowledge of the basis of this structure does add to the  
 167 interpretation of the results, as we explain in the discussion.

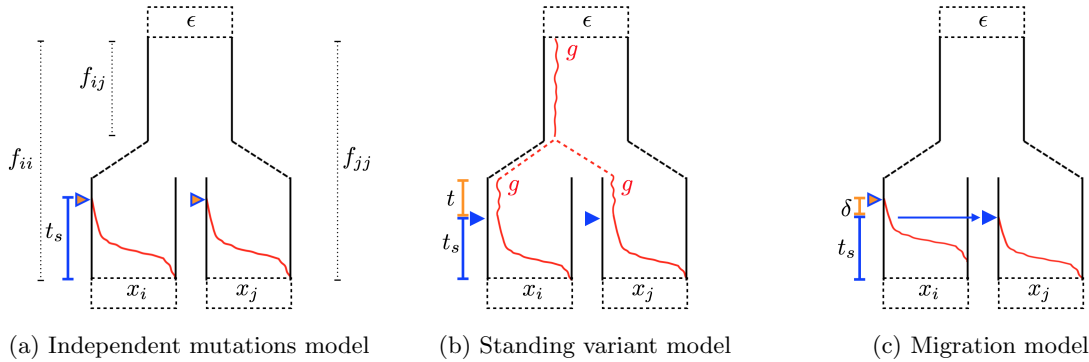

Figure 2: Trajectories of the beneficial allele (red) for the three modes of convergent adaptation. Populations  $i$  and  $j$  are under selection with present-day allele frequencies  $x_i$  and  $x_j$  at a neutral locus, derived from an ancestral population with allele frequency  $\epsilon$ . The populations share some amount of drift proportional to  $f_{ij}$  before reaching the ancestral population. (2a) Beneficial mutations, indicated by the orange triangles, occur independently in the selected populations after they have become isolated. Selection begins, indicated by the blue triangles, once the beneficial allele is present in the population. The beneficial allele sweep to fixation in  $t_s$  generations. (2b) The beneficial allele is standing at frequency  $g$  in the ancestral population. After the selected populations split, it is still standing at frequency  $g$  for  $t$  generations prior to the onset of selection. (2c) The beneficial allele arises in population  $i$  and begins sweeping in population  $i$ . Meanwhile, there is a continuous low level of migration from population  $i$  into population  $j$ . The beneficial allele establishes in  $j$  after  $\delta$  generations, where it is swept to fixation in  $t_s$  generations.

### 168 2.2.1 Independent mutation model

169 We first consider the case when a beneficial allele arises independently via *de novo* mutations at the same  
 170 locus, or tightly linked loci, in both of the selected populations. We expect hitchhiking to increase the  
 171 variance in neutral allele frequency deviations around the selected site in both populations. However, as the  
 172 sweeps are independent and there is no gene flow between populations during or after the sweep, we expect  
 173 no covariance in the neutral allele frequency deviations between these populations, beyond that expected  
 174 under neutrality due to shared population history prior to the introduction of the beneficial allele.

175 Moving backward in time, sampled neutral lineages linked to the selected site will be forced to coalesce  
 176 if both lineages do not recombine off the sweep. We define the probability that a single neutral allele fails to  
 177 recombine off the background of the beneficial allele during the sweep phase as  $y$ , which we can approximate  
 178 as

$$y \approx e^{-rt_s/2} \quad (3)$$

179 (Kim and Stephan, 2002; Durrett and Schweinsberg, 2004; Nielsen et al., 2005) where  $r$  is the recombination  
 180 rate between the neutral locus and selected site, and  $t_s$  is the amount of time the sweep phase takes (Figure  
 181 2a). When the beneficial allele arises from a new mutation and selection is additive,  $t_s \approx 2\log(4N_e s)/s$ , where  
 182  $s$  is the selection coefficient for the heterozygote, such that heterozygotes experience a selective advantage  
 183 of  $s$  and homozygotes  $2s$  (Gillespie, 2000; Barton, 1998). The factor of  $4N_e s$  is due to the fact that our new  
 184 mutation, if it is to establish in the population, rapidly reaches frequency  $1/(4N_e s)$  in the population and  
 185 then increases deterministically from that frequency (Maynard Smith, 1971; Barton, 1998; Kim and Stephan,  
 186 2002; Kim and Nielsen, 2004).

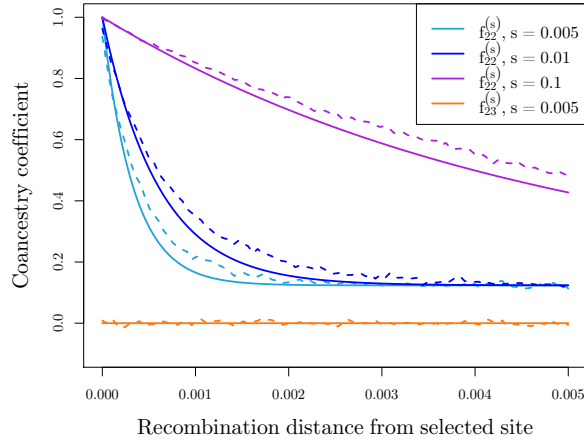

(a) Independent mutations model

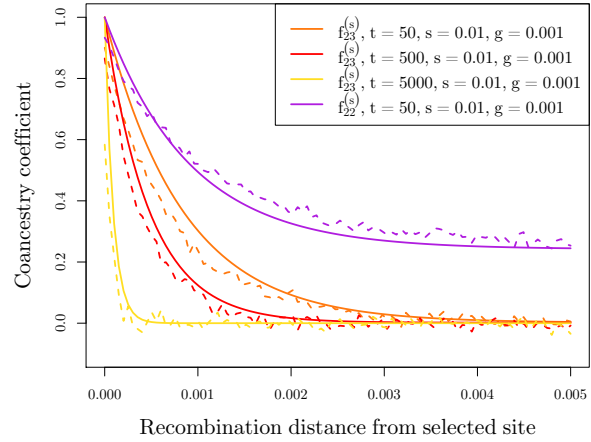

(b) Standing variant model

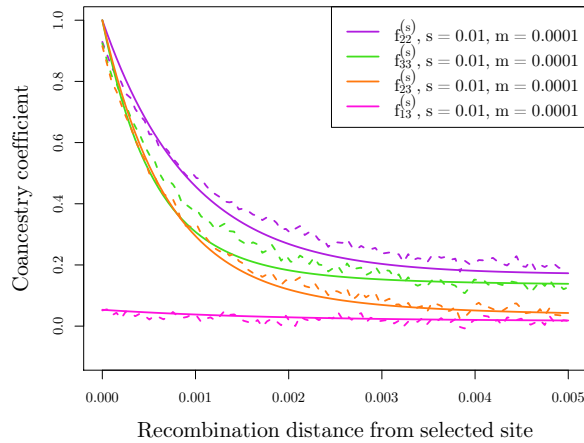

(c) Migration model

Figure 3: We calculated the average coancestry coefficient values across 1000 runs of simulations for each of 100 bins of distance away from the selected site to compare our simulation results (dashed lines) to our theoretical expectations (solid lines). (3a) Average coancestry coefficients under the independent mutations model ( $N_e = 100,000$ ) within a selected population (population 2) with varying  $s$ . Also shown is the coancestry coefficient between selected populations which in this case is 0, the neutral expectation. (3b.) Coancestry coefficients under the standing variation model between selected populations with varying amount of time beneficial allele has been independently standing in populations ( $t$ ). The coancestry coefficient within a single population is also shown for  $t = 50$ . For all,  $N_e = 10,000$ ,  $g = 0.001$ ,  $s = 0.01$ . (3c) Coancestry coefficients under the migration model, within both selected populations (source population 2 and recipient population 3) as well as between source and recipient (2,3) and between recipient and a non-selected population (1,3). Here we are showing one set of parameters ( $s = 0.01$ ,  $m = 0.0001$ ,  $N_e = 10,000$ ) as estimates do not vary dramatically with changing  $m$  (see Figure S2).

187 The coancestry coefficient in population  $i$  that experiences a sweep,  $f_{ii}^{(S)}$ , is defined as the probability  
188 that two lineages sampled from population  $i$  coalesce either due to the sweep phase or neutrally before  
189 reaching the ancestral population. With probability  $y^2$ , both lineages fail to recombine off the beneficial  
190 background during the sweep, and they will be forced to coalesce. If one or both lineages recombines off the  
191 sweep (with probability  $1 - y^2$ ), they can coalesce before reaching the ancestral population with probability  
192  $f_{ii}$ . Combining these we find

$$f_{ii}^{(S)} = y^2 + (1 - y^2)f_{ii} \quad (4)$$

193 For convenience, in our inference procedure, we assume the same strength of selection between our selected  
194 populations and thus duration of the sweep is the same. So,  $f_{jj}^{(S)}$  takes the same form as Equation 4, with  
195 its own neutral probability ( $f_{jj}$ ) of coalescing. Given that we assume the sweeps complete recently and have  
196 the same duration, the mutational events occur at approximately the same time in each selected population.  
197 If we assume there is no neutral migration amongst populations, Equation 4 will hold regardless of where  
198 the sweep occurs on the branch leading to  $i$  (but when migration occurs we need the sweep to be recent so  
199 that lineages sampled from population  $i$  are found in population  $i$  when the sweep occurs).

200 For the coancestry coefficient between two selected populations  $i$  and  $j$ , we can calculate the probability  
201 two lineages, one sampled from population  $i$  and the other from population  $j$ , coalesce. When the sweeps  
202 are independent, the lineages can only coalesce with probability  $f_{ij}$  before reaching the ancestral population,  
203 as they have no probability of coalescing during the sweep phases which have independent origins. Thus,

$$f_{ij}^{(S)} = f_{ij} \quad (5)$$

204 **Comparison to simulated data** In Figure 3a we show the case of convergence due to independent  
205 origins of the beneficial allele. As we predicted, there is no additional coancestry between the selected  
206 populations. Additionally, we show how the coancestry within a selected population decays with distance  
207 from the selected site for a range of values for the strength of selection. These coancestry values decay to the  
208 neutral expectation at other regions of the genome. With larger  $s$ , this decay is slower as the sweep occurs  
209 more rapidly and there are fewer chances for recombination to occur during this time.

## 210 2.2.2 Standing variant model

211 We turn now to the case of a sweep shared between populations  $i$  and  $j$  due to selection acting on shared  
212 ancestral variation (Figure 2b). Our model is appropriate for cases where the standing variation from which  
213 the sweep arises was previously neutral or was maintained in the population at some low frequency by  
214 balancing selection. Let the beneficial allele be standing at frequency  $g$  in the ancestral population. We  
215 assume that the beneficial allele frequency does not deviate much from that of the ancestral population  
216 such that it is still  $g$  in the daughter populations prior to selection. Selection favoring the beneficial alleles  
217 begins  $t$  generations after the populations split and the beneficial allele reaches fixation in both populations  
218 after  $t_s$  generations (see Figure 2b). We assume  $t$ ,  $g$ , and  $s$  are the same for all of our selected populations.  
219 More work is needed to allow population-specific parameters to relax these assumptions. We acknowledge  
220 all selected populations starting from the same beneficial allele frequency may be unrealistic in many cases,  
221 particularly if  $t$  is long or if the populations experience bottlenecks at the time of the split.

222 We first consider the coalescent process of two lineages within a single selected population. Again,  $y$  is  
223 the probability that a neutral lineage fails to recombine off the background of the beneficial allele during the  
224 sweep phase. Given that the beneficial allele is increasing from frequency  $g$ ,  $y$  takes the same form as Equation  
225 3, where now  $t_s \approx 2 \log(1/g)/s$ . If both lineages fail to recombine off the beneficial background during the  
226 sweep, there is a probability of coalescing during the standing phase that is higher than the probability of two  
227 neutral lineages randomly sampled from the population coalescing. Following from our assumptions during  
228 the standing phase, the rate at which two lineages coalesce within a population is  $1/(2N_e g)$  per generation.  
229 Alternatively, a lineage can recombine off in the standing phase onto the other background with probability  
230  $r(1 - g) \approx r$  per generation. As these are two competing exponential processes, the probability two lineages  
231 coalesce before either recombines off the beneficial background can be simplified to

$$P(\text{coalesce in standing phase}) = \frac{1}{1 + 4N_e r g} \quad (6)$$

232 as described by Berg and Coop (2015). If either neutral lineage recombines off the beneficial background  
233 before they coalesce, the probability of coalescing with the other lineage before reaching the ancestral popu-  
234 lation can be treated as the coancestry coefficient associated with that particular portion of the population  
235 tree.

236 Taking these approximations into account, we derive a coancestry coefficient for a neutral allele in pop-  
237 ulation  $i$  that experiences selection from standing variation as

$$f_{ii}^{(S)} = y^2 \left( \frac{1}{1 + 4N_e r g} + \frac{4N_e r g}{1 + 4N_e r g} f_{ii} \right) + (1 - y^2) f_{ii} \quad (7)$$

238 The first term corresponds to both lineages failing to recombine off the beneficial background during the  
239 sweep phase, which puts them both on the same background as the beneficial allele in the standing phase.  
240 Now, the two lineages can either coalesce in the standing phase or recombine off of the background of the  
241 beneficial allele where they can coalesce neutrally before they reach the ancestral population. Alternatively,  
242 one or both lineages can recombine off during the sweep phase and again they can coalesce neutrally.

243 Populations that share a sweep due to shared standing ancestral variation will have increased covariance  
244 in the deviations of neutral allele frequencies around their ancestral means around the selected site since  
245 they will have a shared segment of the swept haplotype. From a coalescent perspective, this occurs because  
246 two lineages sampled from each population have a higher probability of coalescing if they stay on the  
247 beneficial background during the sweep and standing phases than two lineages sampled randomly between  
248 the populations.

249 The probability that a single lineage does not recombine off onto the non-beneficial background during  
250 the standing phase for  $t$  generations can be approximated as

$$(1 - r_t) = (1 - r(1 - g))^t \approx e^{-rt} \quad (8)$$

251 The coancestry coefficient between populations  $i$  and  $j$  is now

$$f_{ij}^{(S)} = y^2 \left( (1 - r_t)^2 \left( \frac{1}{1 + 4N_e r g} + \frac{4N_e r g}{1 + 4N_e r g} f_{ij} \right) + (1 - (1 - r_t)^2) f_{ij} \right) + (1 - y^2) f_{ij}. \quad (9)$$

252 This derivation follows from that of  $f_{ii}^{(S)}$  in Equation 7, but now incorporates the additional probability  
253  $(1 - r_t)^2$  of both lineages failing to recombine off the beneficial background during their independent standing  
254 phases for time  $t$ .

255 This standing variation case represents a simple model of selection on standing variation. However, we  
256 expect in many cases that the beneficial allele has not been standing since the ancestral population of  
257 the convergent population, but rather has been moved among populations by migration before becoming  
258 adaptive at some later time point. In these cases we invoke a model where the standing allele spreading by  
259 migration from some source population to recipient populations  $t$  generations in the past before the allele  
260 became favored. See Appendix A.4 for details. This model differs from the migration model presented in the  
261 next section in which we assume a continuous rate of migration throughout the duration of the sweep and  
262 that the variants sweep as soon as they are established in the population. In this standing case with a source  
263 of the standing variant, moving backwards in time we assume that the allele is standing for  $t$  generations in  
264 a population after the sweep and before the beneficial lineage migrates back instantly into a specified source  
265 population (see Figure 11). Biologically, it naturally captures the case where the allele is shared between the  
266 populations due to migration but is standing for sometime before it sweeps. For data analysis, we default  
267 to using this more complex model, where sampled selected populations are evaluated as possible sources of  
268 the standing variant.

269 Extending this models to allow for the source to be a non-sampled population would be useful in studying  
270 the so-called “the transporter hypothesis” (Schluter and Conte, 2009; Bierne et al., 2013; Welch and Jiggins,  
271 2014) where adaptive gene flow is acting to introduction variation standing in another population. Here,  
272 more work is needed to address issues related to estimating coancestry coefficients for unsampled populations  
273 (see Appendix A.4 for more information).

274 **Comparison to simulated data** In Figure 3b we show comparisons of simulations to show the fit of  
275 our predictions to simulations with adaptation from standing variation in the classic sense. As the duration



276 of the independent standing phases,  $t$ , increases, the coancestry at linked neutral alleles between selected  
 277 populations decreases. Forward in time, this has the interpretation that the longer the beneficial allele  
 278 is standing in the populations, the shorter the shared haplotype between the populations will be due to  
 279 independent recombination events before selection begins. In the case that the beneficial allele has been  
 280 standing for a very long time ( $t \rightarrow \infty$ ) before selection occurs, this additional covariance will reduce to zero  
 281 as in the independent sweeps case (Equation 5). We acknowledge this scenario is biologically unrealistic.  
 282 For large values of  $t$  at small  $g$ , we expect it is likely that the allele would get either be lost or there may be  
 283 allelic turnover due to recurrent mutations of the beneficial allele. However, it is useful here to gain intuition  
 284 about when our models overlap. Conversely, if the standing variant is very young ( $t \rightarrow 0$ ), the decay in  
 285 covariance between populations takes the form of the variance within populations (Equation 7) which, as we  
 286 will see in the next section, looks similar to the pattern generated under the migration model.

### 287 2.2.3 Migration model

288 We now consider the case where the selected allele is spread across sub-populations by migration. This  
 289 scenario has been studied by a number of authors (Slatkin and Wiehe, 1998; Santiago and Caballero, 2005;  
 290 Kim and Maruki, 2011, note these all assume that the allele sweeps in all of the populations), and our  
 291 approach here follows similar lines to that of Kim and Maruki (2011). Let there be a single origin of the  
 292 beneficial allele, which occurs in population  $i$ . We assume a low, continuous level of migration during the  
 293 sweep, with a proportion  $m$  of individuals in population  $j$  coming from population  $i$  each generation. Here  
 294 we are considering only unidirectional migration from population  $i$  into population  $j$ . We say the sweep  
 295 began in population  $j$  at time  $t_s$  generations in the past and at time  $t_s + \delta$  for population  $i$  (Figure 2c). Kim  
 296 and Maruki (2011) found that the mean delay time,  $\delta$ , between the two sweeps can be approximated by

$$\delta \approx \frac{1}{s} \log \left( 1 + \frac{s}{m} \right). \quad (10)$$

297 The coancestry coefficient of the source population,  $f_{ii}^{(S)}$ , follows that of a population experiencing an  
 298 independent sweep from new mutation (Equation 4). To derive the coancestry coefficient of the recipient  
 299 population,  $f_{jj}^{(S)}$ , we first need to consider the fate of two lineages sampled in population  $j$  at the selected  
 300 site. Two events can occur if we trace the lineages of two beneficial alleles back in time: either the two  
 301 lineages coalesce in population  $j$  and a single lineage migrates back into population  $i$  or the two lineages  
 302 independently migrate back into the source population and coalesce there. We define the probability of these  
 303 two events as  $Q$  and  $1 - Q$ , respectively. We use the approximation

$$Q \approx \frac{1}{1 + 4Nm} \quad (11)$$

304 (see Pennings and Hermisson, 2006). Assuming  $m$  is small, such that a beneficial allele sampled at present  
 305 day in population  $j$  migrates back into population  $i$  approximately  $t_s$  generations in the past, the probability  
 306 of a linked neutral allele recombining off during the sweep phase in population  $j$  can be approximated by  $y$ .  
 307 If the lineage migrates back into population  $i$  before it recombines off the beneficial background, there is an  
 308 additional time  $\delta$  in population  $i$  for recombination to happen. So, there is an additional probability,  $e^{-r\delta}$ ,  
 309 of recombination of our linked neutral allele off the beneficial background.

310 Thus, the coancestry coefficient for the recipient population is now

$$f_{jj}^{(S)} = Q \left( y^2 + (1-y)^2 f_{jj} + 2y(1-y) f_{ij} \right) + (1-Q) \left( y^2 e^{-2r\delta} + y^2 (1 - e^{-2r\delta}) f_{ii} + 2(1-y)y f_{ij} + (1-y)^2 f_{jj} \right) \quad (12)$$

311 The terms in this approximation correspond to the following coalescent scenarios: First, if two lineages  
 312 sampled in population  $j$  coalesce before migrating (with probability  $Q$ ), then linked neutral alleles can  
 313 coalesce either during the sweep if neither lineage recombines off the beneficial background, neutrally in  
 314 population  $j$  if both lineages recombine off, or neutrally shared drift phase of populations  $i$  and  $j$  if just one  
 315 lineage recombines off. Alternatively, if the two lineages fail to coalesce before one or both migrates (w.p.  
 316  $1 - Q$ ), there are four ways linked neutral alleles can coalesce:

- 317 1. Both lineages fail to recombine off the beneficial background during the sweep and are forced to  
 318 coalesce during the sweep in population  $i$ . The factor  $e^{-2r\delta}$  represents the additional opportunity for  
 319 recombination when both lineages have migrated back into population  $i$ .

- 320 2. Both lineages stay on the beneficial background in population  $j$  (w.p.  $y^2$ ) but one or both lineages  
321 recombines off in population  $i$  (w.p.  $1 - e^{-2r\delta}$ ) and they coalesce neutrally in the source population  
322 with probability  $f_{ii}$  before reaching the ancestral population.
- 323 3. Either lineage recombines off the beneficial background while it is still in population  $j$  and the two  
324 lineages coalesce neutrally in the shared drift phase of populations  $i$  and  $j$ , with probability  $f_{ij}$  before  
325 reaching the ancestral population.
- 326 4. Both lineages recombine off during the sweep phase while they are still in population  $j$  and they coalesce  
327 neutrally with probability  $f_{jj}$ .

328 When a beneficial allele is shared between populations  $i$  and  $j$  via migration, there will be additional  
329 covariance in the deviations of linked neutral allele frequencies from their ancestral means. In this case,  
330 there are three ways a lineage sampled from population  $i$  and a lineage sampled from population  $j$  can  
331 coalesce. They are forced to coalesce during the sweep if both lineages fail to recombine off the background  
332 of the sweep, which occurs with probability  $y^2e^{-r\delta}$ . Alternatively, the lineage sampled in population  $j$  can  
333 recombine off the beneficial background before it migrates back to source population  $i$ , in which case the  
334 lineages can coalesce neutrally before reaching the ancestral population in their shared drift phase, with  
335 probability  $f_{ij}$ . Lastly, if the lineage sampled in population  $j$  migrates back into population  $i$  then the  
336 two sampled neutral lineages can coalesce neutrally in population  $i$  with probability  $f_{ii}$  if the lineages don't  
337 coalesce due to the sweep (i.e. either recombines off in time  $t_S$  or  $\delta$ ). Thus, in the case of continuous  
338 migration the coancestry coefficient between the source and recipient population is

$$f_{ij}^{(S)} = y^2e^{-r\delta} + (1 - y)f_{ij} + y(1 - ye^{-r\delta})f_{ii} \quad (13)$$

339 To fully specify the coancestry matrix with selection, we need to take into account the effect migration  
340 has on non-selected populations. Specifically, the coancestry coefficients between recipient and non-selected  
341 populations are impacted since there is some probability linked neutral lineages will migrate from the recipient  
342 population into the source population backwards in time. Let population  $k$  be a non-selected population.  
343 Now, the coancestry coefficient between populations  $j$  and  $k$  can be expressed as

$$f_{jk}^{(S)} = (1 - y)f_{jk} + yf_{ik} \quad (14)$$

344 This is informative about the direction of migration. First, there is no impact of selection on the re-  
345 lationship between the source and non-selected populations. Additionally, the sweep shared via migration  
346 will induce additional coancestry between  $j$  and  $k$  if  $k$  is more closely related to our source population (e.g.  
347 population 1 in Figure 1 if population 2 is the source). The opposite is true if  $k$  is more closely related to  
348 our recipient population (e.g. population 4). Now, there is a deficit in the background level of coancestry  
349 between populations  $j$  and  $k$  near the selected site.

350 **Comparison to simulated data** In Figure 3c we show our results above compared to simulations with  
351 continuous migration during the sweep phase, for a single set of parameters ( $s = 0.01$ ,  $m = 0.001$ ). Here,  
352 we have migration occurring from population 2 into population 3. We show the four relevant coancestries  
353 as a function of distance from the selected site: the covariance within source ( $f_{22}^{(S)}$ ), within recipient ( $f_{33}^{(S)}$ ),  
354 between source and recipient ( $f_{23}^{(S)}$ ), within recipient and a non-selected population ( $f_{13}^{(S)}$ ). We see the  
355 coancestry within the recipient population decays more rapidly than coancestry within the source population.  
356 This fits our expectations as there is some probability a lineage will, backwards in time, migrate back to the  
357 source population, decreasing the probability of coalescing before reaching the ancestral population when  
358  $m$  is small. As  $m$  increases, this relationship changes (Figure S2). We also see increased coancestry near  
359 the selected site between the selected populations. The pattern of decay varies from that observed in our  
360 standing variation model, except for when  $t$  is small. Additionally, we see increased coancestry between  
361 the recipient population and a non-selected population that decays with recombinational distance to their  
362 neutral expectation. Note, the reverse, coancestry recovering to the neutral expectation with recombinational  
363 distance is observed for populations that initially are more related to the recipient population (i.e. population  
364 4), is also seen (Figure S3a). The coancestries between the source population and non-selected populations  
365 are unaffected (Figure S3b). Together, these observations using information from non-selected populations  
366 help distinguish possible source populations.

### 3 Inference

We have described how selection at linked loci affects the matrix of coancestry coefficients, allowing us to parameterize the variance and covariance in neutral allele frequency deviations within and between populations. To estimate the likelihood of our data under convergent adaptation models, we need a probability model for how allele frequencies depend on these variances and covariances. Neutral allele frequencies across  $K$  populations can approximately be modeled jointly as a multivariate normal distribution around the ancestral allele frequency,  $\epsilon$ , with covariance proportional to the coancestry coefficients (Nicholson et al., 2002; Weir and Hill, 2002; Coop et al., 2010; Samanta et al., 2009). Specifically,

$$\vec{x} \sim \mathcal{N}(\epsilon \vec{1}, \epsilon(1 - \epsilon)\mathbf{F}) \quad (15)$$

where  $\vec{x}$  is a vector of population frequencies and  $\mathbf{F}$  is the  $K$  by  $K$  matrix of coancestry coefficients without selection.

Above we demonstrated that we can generate coancestry matrices  $\mathbf{F}^{(S)}$  to explain the coancestry between multiple populations due to neutral processes and various modes of convergent adaptation.  $\mathbf{F}^{(S)}$  is a function of the neutral coancestry, ( $\mathbf{F}$ ) the model of convergence ( $M$ ) and its parameters ( $\Theta_M$ ), and the recombination distance a neutral site is away from a selected site ( $r_l$ ). Thus, modeling neutral allele frequencies as multivariate normal with covariance proportional to this new coancestry matrix, we can calculate the likelihood of observed data a given distance away from the selected site under a specific model of convergence as

$$P(\vec{x}_l | r_l, \mathbf{F}, M, \Theta_M) \approx \mathcal{N}(\vec{x}_l | \epsilon_l \vec{1}, \epsilon_l(1 - \epsilon_l)\mathbf{F}^{(S)}(r_l, \mathbf{F}, M, \Theta_M)) \quad (16)$$

In practice, we do not know the true ancestral mean at a given locus,  $\epsilon_l$ , so we use the mean of the present day population allele frequencies and calculate likelihoods of mean-centered allele frequencies and coancestry matrices (we account for this mean centering in appendix A.2.6). We also do not know the true neutral coancestry matrix,  $\mathbf{F}$ , but estimate it from deviations of allele frequencies from sample means across the entire genome. We also incorporate the effects of sampling into this variance-covariance matrix. See appendix A.1 for details.

#### 3.1 Composite-likelihood framework

We calculate the likelihood of all data ( $D_\ell$ ) in a large window around the selected site ( $\ell$ ) under a given model of convergent adaptation ( $M$ ), with its associated parameters ( $\Theta_M$ ), as the product of the marginal likelihoods for sites all distances away from the selected site. This composite likelihood is used as an approximation to the total likelihood of all sites, but is not a proper likelihood as neighboring sites are correlated due to shared histories. Moving  $L_{\text{left}}$  sites to the left of the proposed selected site and  $L_{\text{right}}$  sites to the right,

$$\mathcal{L}_C(M, \Theta_M; D_\ell) = \prod_{i=1}^{L_{\text{left}}} P(\vec{x}_i | M, \mathbf{F}_M^{(S)}(r_i, \mathbf{F}, M, \Theta_M)) \prod_{j=1}^{L_{\text{right}}} P(\vec{x}_j | \mathbf{F}_M^{(S)}(r_j, \mathbf{F}, M, \Theta_M)) \quad (17)$$

where  $r_i$  is the genetic distance from site  $i$  to  $\ell$ , and similarly for  $r_j$ . We can also obtain a composite likelihood of our data under a neutral model ( $N$ ),  $\mathcal{L}_C(N; D_\ell)$ , which is only parameterized by  $\mathbf{F}$ . This framework enables us to:

1. Identify the maximum likelihood location of the selected locus in a region by varying the location of the proposed selected site. For a given region and model of convergent adaptation we vary the location of the selected site, taking the maximum composite likelihood over a grid of parameters. We take as our best estimate of the location under a given model of convergence, the maximum composite-likelihood location of the selected site ( $\hat{\ell} = \underset{\ell, \Theta_M}{\text{arg max}} \mathcal{L}_C(M, \Theta_M; D_\ell)$ ).
2. Determine the parameter(s) which maximize our composite-likelihood estimates under a given model at a given location of the selected site ( $\ell$ ). We obtain these maximum composite-likelihood estimate

406 (MCLE) parameters by evaluating the composite likelihood across a grid of parameters for a given  
407 location of the selected site ( $\widehat{\Theta}_M = \underset{\Theta_M}{\operatorname{arg\,max}} \mathcal{L}_C(M, \Theta_M; D_\ell)$ ).

408 3. Distinguish between modes of convergence, and neutrality, in a genomic region by comparing the  
409 maximum likelihood under various models of convergent evolution. At a given location of the se-  
410 lected site ( $\ell$ ) we compare the maximum composite likelihood of each model to the neutral model  
411  $\left( \log \left( \mathcal{L}_C(M, \widehat{\Theta}_M; D_\ell) / \mathcal{L}_C(N; D_\ell) \right) \right)$ .

412 This composite likelihood ignores the correlation in allele frequencies (linkage disequilibrium) between  
413 neutral sites so the composite-likelihood surface will be too peaked. A number of authors have taken  
414 composite-likelihood approaches to inferring a range of population genetic parameters (e.g. Hudson (2001);  
415 see Larribe and Fearnhead (2011); Varin et al. (2011) for a broader statistical views on composite likelihood).  
416 In the setting of inferring genome-wide parameters, e.g. parameters of neutral demographic models, the  
417 maximum composite-likelihood parameter estimates are known to be consistent in the limit of many unlinked  
418 genomic regions (Wiuf, 2006). While in general composite-likelihood methods perform well, in all of these  
419 settings typical measures of uncertainty of parameters (confidence intervals) and model choice methods (e.g.  
420 AIC) are undermined due to the over peakiness of the likelihood.

421 Composite-likelihood approaches have also been used in the context of selective sweeps, starting with  
422 Kim and Stephan (2002) who take a composite likelihood formed like Equation 17 of the product of marginal  
423 probabilities of allele frequencies within a single population moving away from a proposed selected site (an  
424 approach expanded on by Kim and Nielsen, 2004; Nielsen et al., 2005; Chen et al., 2010; DeGiorgio et al.,  
425 2014; Racimo, 2016). Our method is most closely related to that of Chen et al. (2010) and Racimo (2016)  
426 who look at allele frequencies across two or three populations respectively, and look for the signal of a sweep  
427 in one of the populations (or in the case of Racimo, 2016, in the ancestor of a pair of populations). We note  
428 that we have a further layer of abstraction over these previous composite-likelihood methods. Extending Kim  
429 and Stephan (2002), previous methods have calculated the likelihood of the sample frequency considering  
430 a binomial draw from some underlying population frequency, which is naturally modeled as being bounded  
431 between 0 and 1. We, however, use a multivariate normal likelihood to model our sample frequencies, which  
432 does not bound allele frequencies between 0 and 1. This further abstraction is justified by the fact that by  
433 using the multivariate normal approach we are able to handle arbitrarily large number of populations with  
434 arbitrary population structure and to flexibly model different forms of selection into an easily extendable  
435 form to the covariance matrix. Future work could potentially concentrate on hybrid approaches, combining  
436 the flexibility of our approach with the realism of previous approaches.

## 437 3.2 Inference method on simulated data

438 To test our method, we utilized the datasets generated using `mssel` (as discussed above with details in  
439 Appendix A.2) to see if we could recover the parameters and convergent mode used for simulation. The  
440 neutral coancestry matrix  $\mathbf{F}$  was estimated using data from 1000 runs with no selection (as described in  
441 Appendix A.1). We assume that the model parameters  $N_e$  and  $r$  are known and we set these at the values used  
442 to generate the simulations. We calculated the composite log-likelihoods for each of the simulated datasets  
443 under the following four models: neutral (no selection), independent sweep model, standing variation model,  
444 and migration model with the beneficial allele originating in population 2. We calculate the likelihoods  
445 under a dense grid of selection coefficients ( $s$ ), migration rates ( $m$ ), and standing times ( $t$ ). In the standing  
446 variation model, the standing frequency ( $g$ ) is held at 0.001. See Appendices A.2.4 and A.2.5 for details.  
447 We repeat this procedure for each of 100 runs of all simulated datasets. To compare between models, we  
448 calculate the composite log-likelihood differences between the true model and all other models including  
449 the neutral model, at the maximum composite-likelihood parameter estimate (MCLE) obtained under each  
450 model.

### 451 3.2.1 Parameter estimation

452 **Location of selected site** To explore our method’s ability to localize the selected site, we vary the true  
453 location of the selected site simulating under the independent mutation model. We estimate the maximum

454 composite-likelihood location under the independent sweep model over a fine grid of locations and selection  
455 coefficients. The method is able to correctly identify the location of selection (Figure 4a), with higher  
456 accuracy when the true location of the site is in the middle of the window. The method does show an edge  
457 effect when the true location of the selected site is at the edge of the region of interest perhaps because we  
458 do not get to see the decay of coancestry on both sides of the selected site. Additionally, we are able to  
459 correctly estimate the strength of selection while allowing the location of the selected site to vary (Figure  
460 S1a) and there is no correlation between these joint parameter MLCEs (Figure S1b).

461 **Independent mutations model** To verify our ability to recover the selection coefficient, we simulated  
462 under the independent mutation model for a range of values for  $s$ , holding the location of the selected site  
463 at its true value. We are able to recover the parameters used for simulation (Figure 4b). The ability to  
464 correctly estimate  $s$  breaks down for large enough  $s$ , given a fixed window-size around the selected site and  
465  $r_{BP}$ , since we will not observe the full decay in coancestry.

466 **Standing variant model** To explore our inference using the standing variant model, we hold the location  
467 of the selected site at its true location and take as our estimate of  $s$  and  $t$  their values at the joint maximum  
468 composite likelihood. Under the standing variant model, we are again able to accurately estimate  $s$  (Figure  
469 S6). The inference of  $s$  and  $g$  simultaneously is somewhat more confounded (Figure 5). How the signal of  
470 the sweep within populations decays, as we move away from the selected site, is primarily determined by  $s$   
471 and  $g$  (see Equation 7). While a higher frequency of the standing variant ( $g$ ) can lead to a quicker decay,  
472 this can be partially compensated for the strength of the sweep being stronger (higher  $s$ , lower  $t_s$ ). This  
473 explains the  $J$ -shaped ridge in the likelihood surfaces for  $s$  and  $g$ , seen in Figure 5. Therefore, in practice  
474 we can often infer a lower bound  $s$  and an upper bound for  $g$ , but not find the precise values of each when  
475 inference is performed under the standing variation model. We are able to accurately estimate the time the  
476 beneficial allele has been standing in the independent populations prior to selection,  $t$ , as shown in Figure  
477 4c. Our inference of  $t$  is relatively free of confounding with  $s$  and  $g$ , as  $t$  primarily governs the decays in  
478 coancestry between populations, making it separable from the scale of the sweep within populations.

479 **Migration model** We explored our inference under the migration model of parameters  $m$  and  $s$ , again  
480 fixing the location of the selected site and taking the joint maximum composite-likelihood estimate. We are  
481 able to correctly estimate  $s$  (Figure S4b). However, we obtain poor estimates of the rate of migration,  $m$   
482 (Figure S4a). This is perhaps unsurprising as the coancestry coefficients under the migration model depend  
483 only weakly on  $m$ . We obtain fairly bimodal estimates of  $m$  that are usually either very low ( $10^{-5}$  to  $10^{-3}$ )  
484 or high (1). As the true value of  $m$  increases, we see fewer estimates of small  $m$  and more estimates of  $m = 1$ .  
485 These estimates of  $m$  seem to be a true reflection of the patterns in the simulated datasets. Specifically, this  
486 effect is mostly observed in the variance within the recipient population as Equation 12 depends on  $m$  in  
487 both  $Q$  and  $\delta$ . High  $m$  estimates correspond to datasets with lower empirical levels of coancestry within the  
488 recipient than datasets where low estimates of  $m$  were obtained (Figure S5). We believe that the bimodality  
489 results from stochasticity in how many lineages ancestral to the sample migrate before they recombine off  
490 the sweep in the recipient population. While our estimates of  $m$  are noisy, the migration model does capture  
491 key features of the spread of adaptive alleles by migration, allowing it potentially to be distinguished from  
492 other modes of convergence. We now turn to the performance of the method in distinguishing modes of  
493 convergence.

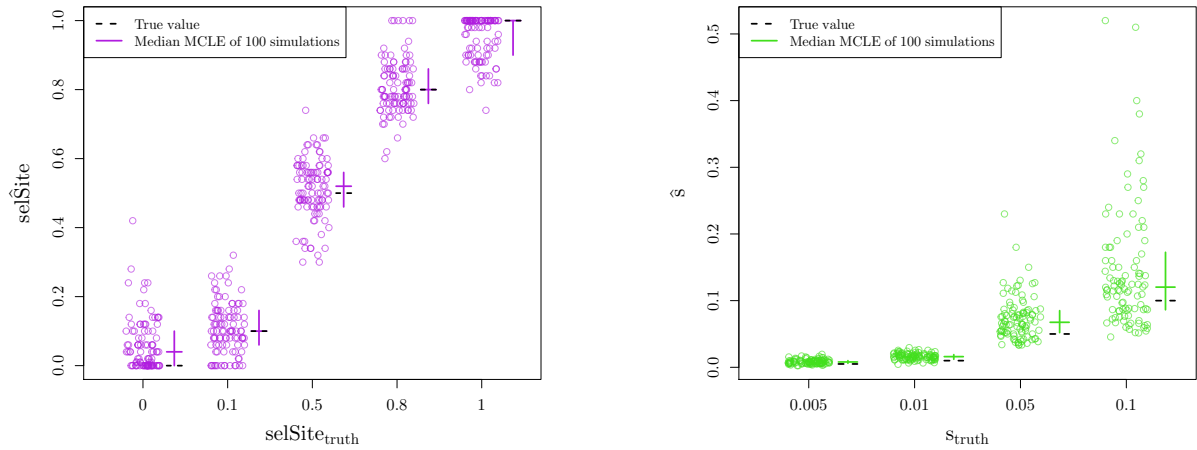

(a) MCLE of the **location of selected site** for 100 simulations under the **independent mutation model** (10 chromosomes per population,  $N_e = 100,000$ ,  $s = 0.05$ )

(b) MCLE of the **strength of selection ( $s$ )** for 100 simulations under the **independent mutation model** (10 chromosomes per population,  $N_e = 100,000$ )

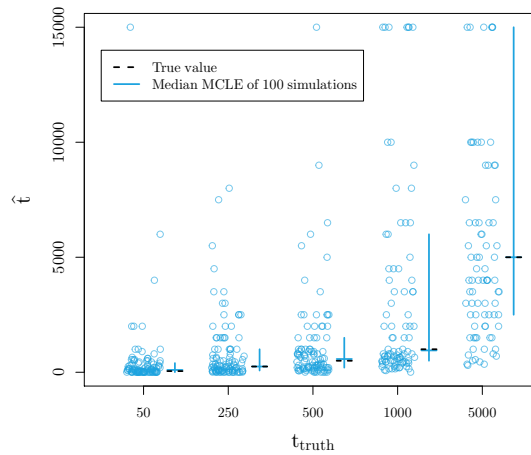

(c) MCLE of the **standing time ( $t$ )** for 100 simulations under the **standing variant model** (10 chromosomes per population,  $N_e = 10,000$ ,  $s = 0.01$ ,  $g = 0.001$ ). For scale, we left out estimates of  $t > 15,000$  (2, 9, and 21 data points when  $t_{\text{truth}} = 500$ , 1000, and 5000, respectively.)

Figure 4: Maximum composite likelihood **parameter estimates** calculated under **model used for simulation**. We vary the true value of the parameter used for simulations along the x-axis and show the MCLE for each of 100 simulations (points). Crossbars indicate first and third quartiles with second quartiles (medians) as the horizontal line. The true values of the parameters are marked with dashed, black lines.

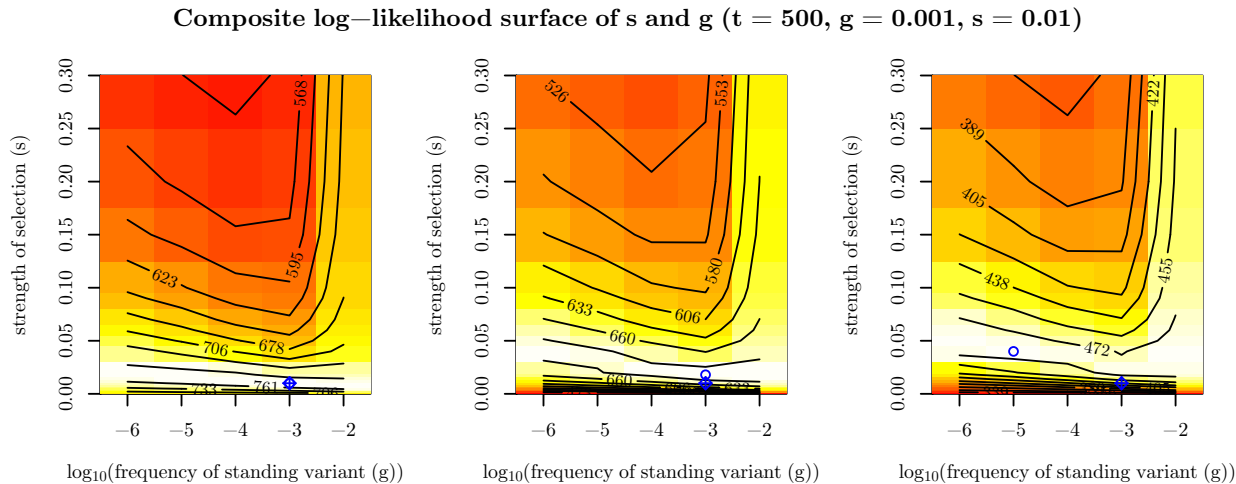

Figure 5: Composite log-likelihood surface of the **strength of selection** ( $s$ ) and the **frequency of standing variant** ( $g$ ) for three simulations (with  $N_e = 10,000$ ,  $t = 500$ ,  $g = 0.001$ ,  $s = 0.01$ ) to exemplify confounding of  $s$  and  $g$  under the **standing variant model**. Blue diamond pluses represent the true location of the parameters used for simulation. Blue circles represent MCLE.

### 494 3.2.2 Model comparison

495 To test the ability of our method to distinguish between modes of convergence, we calculated the maximum  
 496 composite log-likelihood of 100 simulations for each dataset generated under both the true model and all  
 497 other models with a fixed, fine grid of parameter values. The location of the selected site is fixed at its true  
 498 location. The results are summarized in Figure 6, which shows histograms of the difference in maximum  
 499 composite log-likelihoods calculated under a given model relative to the true model used for simulation. For  
 500 example, in evaluating the independent mutations model, we present the difference in the composite log-  
 501 likelihoods calculated for data simulated under the independent mutations model for all other models and  
 502 the composite log-likelihood calculated for the true independent mutations model. Thus, values less than  
 503 zero indicate that the correct model has a higher maximum composite log-likelihood than the true model.  
 504 Conversely, values greater than zero indicate the incorrect model of convergence has a higher composite  
 505 log-likelihood than the true model. For inference under the migration model, we fix the source to be the  
 506 true source of the selected allele when simulating under the migration model, and to an arbitrary one of the  
 507 two selected populations when performing inference on simulations under other models.

508 **Neutral model** We first compare the composite likelihoods calculated for data generated with no selection.  
 509 For the selection models, we fix the location of the selected site. The distributions of the resulting composite  
 510 log-likelihood ratios are shown in Figure 6a. As expected for a composite likelihood, the composite log-  
 511 likelihood ratio between a convergent selection model and the neutral model with no selection are inflated  
 512 compared to those expected under the usual asymptotic  $\chi^2$  distribution. However, these likelihood ratio  
 513 differences are relatively small compared to those we observed when simulating under alternative models.  
 514 This is because when  $s \rightarrow 0$  in all models with selection, the coancestries converge to our neutral expectations.  
 515 Indeed when we look at the MCLE for the strength of selection ( $\hat{s}$ ) under the incorrect models with selection,  
 516 we see that for all nearly simulations  $\hat{s}$  is close to zero 0 (Figure 7a). Overall, this suggests that our null  
 517 model is reasonably well calibrated, given the limitations of composite-likelihood schemes.

518 **Independent mutations model** As shown in Figure 6b, we are able to correctly distinguish between  
 519 a neutral model of no selection and the true independent mutation model by at least 160 composite log-  
 520 likelihood units even for relatively weak selection ( $s = 0.005$ ). This difference increases as the true value of  
 521  $s$  increases. This same relationship is true when comparing the migration model to the true independent

522 mutation model. Therefore, we have good ability to distinguish the independent sweeps model from neutral  
523 and migration model over a range of selection coefficients.

524 Our ability to distinguish between the standing variation model and the true independent mutation model  
525 is less clear. When the true  $s$  is small, the two models have comparable composite log-likelihoods, with  
526 differences ranging from -3 to 20. This difference decreases, with higher likelihood for the true independent  
527 mutation model more frequently, as  $s$  increases. This result makes sense when we look into the maximum  
528 likelihood estimate of the parameter  $t$  (Figure 7b). We obtain estimates of  $t$  approaching our highest  
529 value on the grid ( $10^6$ ). Thus, we may not be able to distinguish between the cases where the origins of  
530 the beneficial allele are truly independent or whether selection has been on a single variant that has been  
531 standing independently for a long time as these two models converge for large  $t$ .

532 **Standing variant model** Simulating under the standing variation model, the picture is more complicated.  
533 Like the other models, we can exclude the neutral model, although note that this would become challenging  
534 when the allele has been standing at high frequencies,  $g \gg 0$  (Berg and Coop, 2015). When the independent  
535 standing time,  $t$ , is small, we see little difference in the composite log-likelihoods between the true standing  
536 model and the migration model. As  $t$  increases, we see a larger difference between these two models. However,  
537 as  $t$  increases, the composite log-likelihood difference between the independent mutation model and standing  
538 variation model tightens around 0. These results fit our expectations as we know the models look similar  
539 in the extreme values of  $t$ , the migration model when the standing time is small and independent mutation  
540 model when the standing time is large, respectively.

541 **Migration model** We are able to distinguish the migration model from the neutral and independent  
542 sweeps model. However, the standing variation and true migration model are again somewhat confounded.  
543 The values of the composite log-likelihood differences range from -44 to 123 when  $m = 10^{-4}$  and this range  
544 narrows closer to 0 as  $m$  increases. These results fit our understanding when we again look at the MCLEs  
545 of  $t$  in the standing model. Now, the estimates are at  $t = 0$  (Figure 7c) indicating it is hard to distinguish  
546 between convergence that is due to migration or selection on a shared standing variant that has only been  
547 standing for a very short time, as they result in similar patterns in decay of coancestries.

548 **Summary** We can clearly distinguish the outcomes of the migration and independent sweeps models from  
549 each other. Both models are hard to distinguish from the standing variation case, but in very different  
550 regimes of the standing variation model. The estimated time the variant has been standing ( $t$ ) for is a  
551 helpful indicator of the mode of convergence, with very low estimates meaning that the standing model  
552 is indistinguishable from the migration model, while very high estimates mean that the standing model is  
553 indistinguishable from the independent sweeps model. When data is simulated under the standing model  
554 with intermediate values of  $t$ , we can distinguish this from both independent sweeps and recent migration  
555 models. This is because an intermediate value of  $t$  generates a covariance pattern not well explained by either  
556 other model. Therefore, while comparing the maximum composite likelihoods between models is useful, the  
557 estimated value of  $t$  is useful in judging the different models.



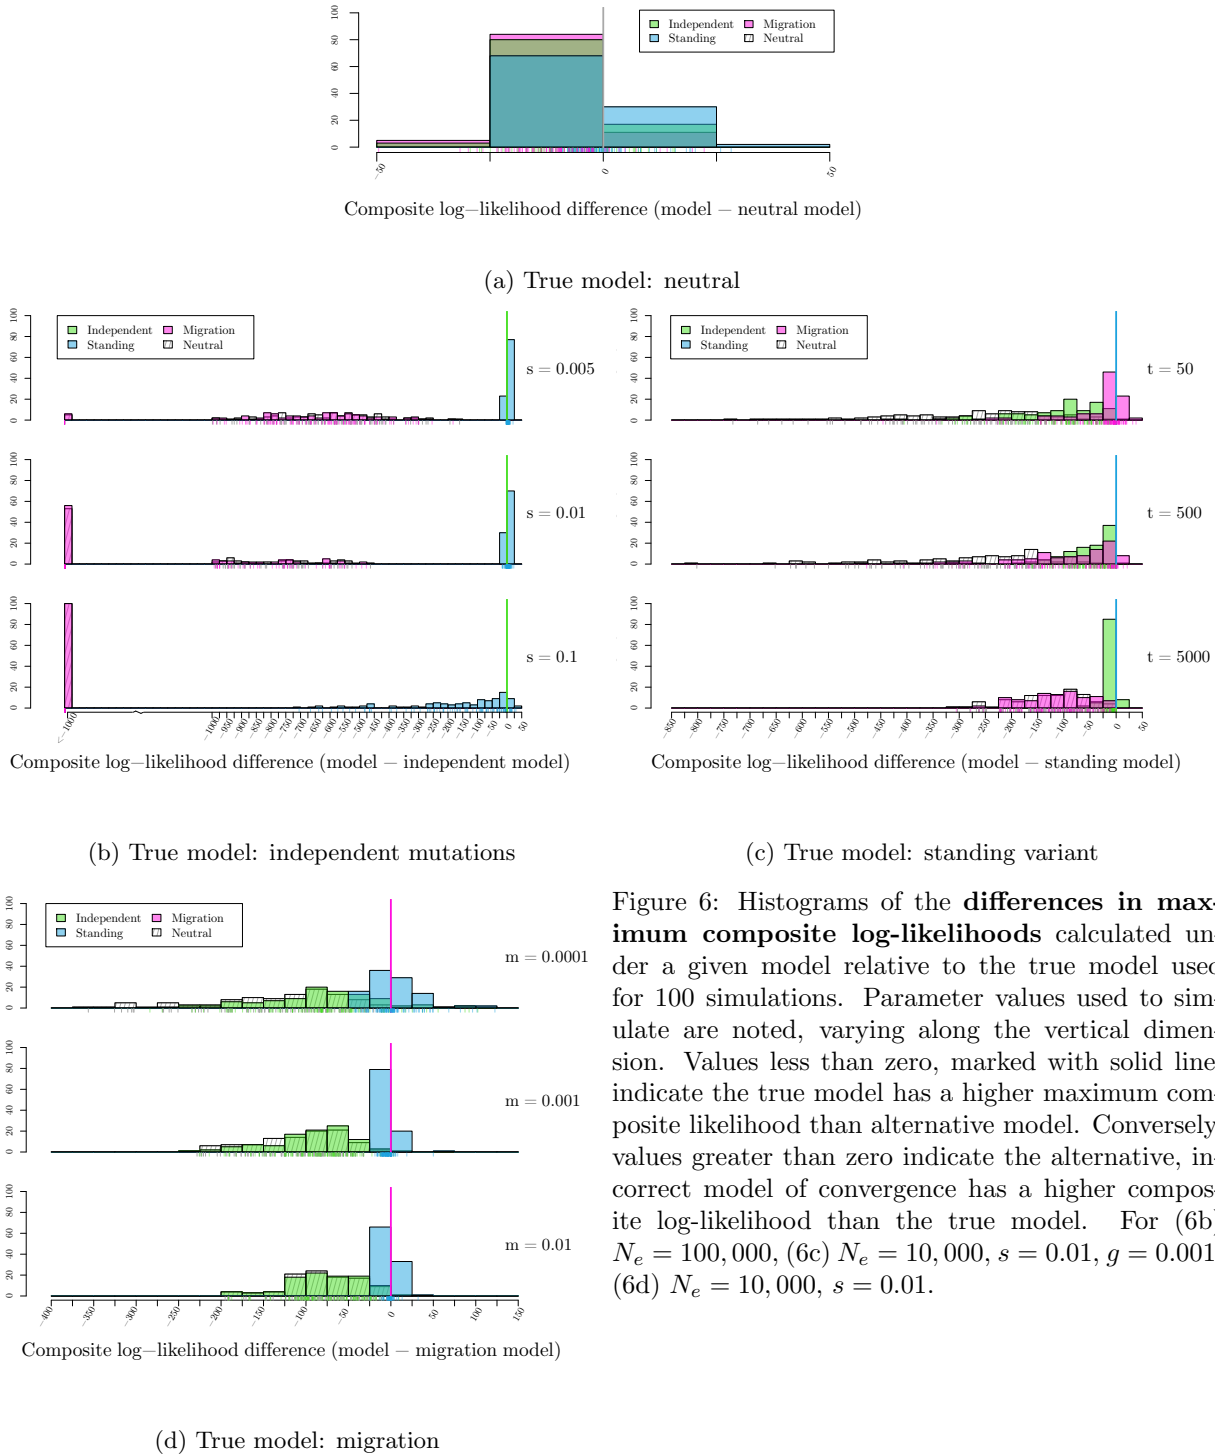

Figure 6: Histograms of the **differences in maximum composite log-likelihoods** calculated under a given model relative to the true model used for 100 simulations. Parameter values used to simulate are noted, varying along the vertical dimension. Values less than zero, marked with solid line, indicate the true model has a higher maximum composite likelihood than alternative model. Conversely, values greater than zero indicate the alternative, incorrect model of convergence has a higher composite log-likelihood than the true model. For (6b)  $N_e = 100,000$ , (6c)  $N_e = 10,000$ ,  $s = 0.01$ ,  $g = 0.001$ , (6d)  $N_e = 10,000$ ,  $s = 0.01$ .

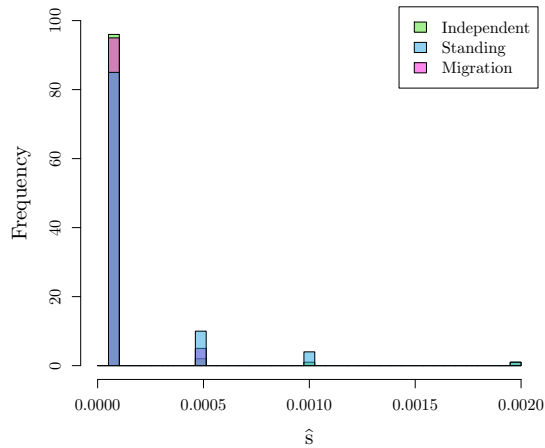

(a) Histogram of MCLE of the **strength of selection ( $s$ ) under all convergent models where the neutral model is true model** used for simulations.

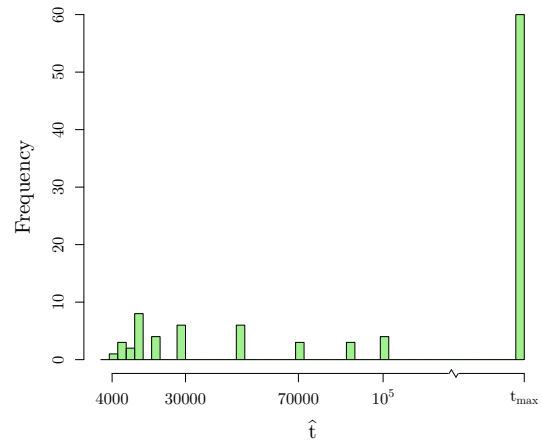

(b) Histogram of MCLE of the **standing time ( $t$ ) under standing variant model where the independent mutation model is true model** used for simulations ( $s = 0.01$ ,  $N_e = 100,000$ ).

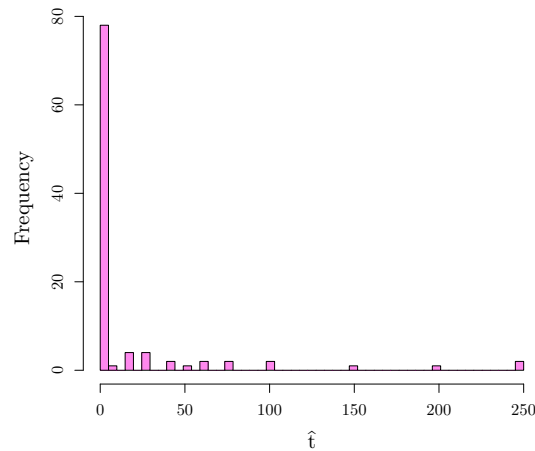

(c) Histogram of MCLE of the **standing time ( $t$ ) under standing variant model where the migration model is true model** used for simulations ( $m = 0.001$ ,  $s = 0.01$ ,  $N_e = 10,000$ ).

Figure 7: Histograms of MCLE for **parameters** estimated under **incorrect models**.

558

### 559 3.2.3 Evaluating properties of the estimators and models for real datasets

560 Our use of a composite likelihood means that we cannot rely on standard asymptotic properties of likelihood  
 561 estimators to construct confidence intervals or help with model choice (e.g. AIC). Therefore, we take a  
 562 parametric-bootstrapping approach, simulating datasets under the MCLEs of various models matched for  
 563 sample sizes and number of segregating sites and other qualities (recombination rate and size of the region,  
 564  $N_e$ , neutral  $\mathbf{F}$  matrix) as the original data. See Appendix A.3 for more details. From these simulations, we  
 565 generate a distribution of composite-likelihood ratios. Specifically, we wish to understand if we have support

566 for a model ( $j$ ) as compared to a seemingly less likely model ( $i$ ); this could be a model with selection to  
567 one without, or a model with standing variation compared to one with independent mutations. We simulate  
568 datasets under one model ( $i$ ), using the MCLE of that model applied to the real data, we then estimate  
569 the maximum composite log-likelihood of dataset  $k$  under this model ( $L_{ki}$ ), and the maximum composite  
570 log-likelihood under a second model  $j$  ( $L_{kj}$ ) and form the distribution over our simulations of the difference  
571  $L_{kj} - L_{ki}$ . We can then compare the value of the composite log-likelihood ratio ( $L_{Dj} - L_{Di}$ ) obtained  
572 for our true dataset  $D$  to this distribution to obtain the parametric-bootstrap p-value for the comparison  
573 the alternative model ( $j$ ) compared to the null model ( $i$ ). Additionally, we generate parametric-bootstrap  
574 confidence interval for parameters of interest, particularly  $t$ , the minimum age of the standing variant, as  
575 this parameter is informative about the overlap of models as shown above.

## 576 4 Applications

### 577 4.1 Copper tolerance in *Mimulus guttatus*

578 The study of adaptation to toxic mine tailings is a classic case of rapid local adaptation to human altered  
579 environments (MacNair et al., 1993). We apply our inference method to investigate the basis of the convergent  
580 adaptation seen between populations of the annual wildflower *Mimulus guttatus* to copper contaminated soils  
581 near Copperopolis, CA. Wright et al. (2015) sequenced pooled samples from 20-31 individuals from two mine  
582 and two off-mine populations from two distinct copper mines in close geographic proximity (all populations  
583 within 15 km of each other) to 34-72X genome-wide coverage for each population. They observed elevated  
584 genome-wide estimates of genetic differentiation between mine and off-mine populations ( $F_{ST}$  M/OM= 0.07  
585 and 0.14), with similar levels of differentiation between the mine populations ( $F_{ST}$  MM= 0.13). Only a small  
586 number of regions had high levels of differentiation. Here, we focus on the region with the strongest signature  
587 of differentiation between the two mine/off-mine pairs found on Scaffold8 by Wright et al. (2015). They  
588 observed low genetic diversity within each mine population in this region compared to off-mine populations.  
589 When the mine populations are compared to each other, they have elevated differentiation in this region,  
590 except for in the center where they share a nearly identical core haplotype. This pattern suggests the sweeps  
591 may not have been independent within each mine population, and that the sweep is possibly shared either  
592 due to migration or selection of shared standing variation.

593 We estimate the  $\mathbf{F}$  matrix using SNPs from twelve scaffolds that showed no strong signals of selection  
594 (shown in Table S6). Using all SNPs in the 169.3 kb Scaffold8, we apply our inference framework to both  
595 identify the locus under selection and distinguish between modes of convergence between the two mine  
596 populations. We move the proposed selected site along this scaffold and calculate the composite likelihood  
597 under our three modes of convergent adaptation: (1) both mine populations have had independent mutations  
598 at the same locus, (2) the beneficial allele was standing in one of the mine populations and was spread via  
599 migration into the other mine population where it is still standing prior to the onset of selection (as detailed  
600 in Appendix A.4), and (3) the beneficial allele arose in one of the mine populations and spread to the other  
601 via migration. We estimate the maximum composite likelihood over a dense grid of parameters used to  
602 specify these models (Table S7). For the migration model, we allow both adapted populations to be possible  
603 sources. We use an  $N_e = 7.5 \times 10^5$ , calculated from the observed pairwise diversity  $\pi = 4N_e\mu$  using a  
604 mutation rate of  $\mu = 1.5 \times 10^{-8}$  and  $r_{BP} = 4.72 \times 10^{-8}$  (Lee, 2009).

605 In Figure 8a, we summarize the results, showing the difference in maximum composite log-likelihoods  
606 between a given model of convergence and the neutral model of no selection as a function of the proposed  
607 selected sites along the scaffold. We see the three likelihoods peaking when the selected site is approximately  
608 at position 303-308 Kbp and that the model with the highest likelihood is selection on shared ancestral  
609 standing variation.

610 To judge the significance of differences in the composite log-likelihood between the standing-source model  
611 and the other models we used our parametric-bootstrap procedure. We simulated 100 datasets under the  
612 independent and migration modes of convergent adaptation at their MCLE as well as a neutral model with no  
613 selection (see Appendix A.3 for details). For each simulated dataset, we calculate the composite log-likelihood  
614 ratio comparing the standing source model to the likelihood of each of the other models (for their respective  
615 simulations), under the same parameter grid as the original data (Table S7) but holding the location of  
616 the selected site and, where relevant, the source population constant at their respective MCLEs used for

617 simulation. Our observed composite log-likelihood ratio, comparing the standing source model to each of the  
618 others, was well outside the range those obtained by simulation (implying a parametric-bootstrap p-value  
619 of  $< 1/100$ ). The smallest difference is under the migration model where the range of out 100 composite  
620 log-likelihood ratios is [4.12, 749.45], while the observed ratio is 945.95 (see Table S8 for all results). These  
621 results suggest that the non-standing source models offer a significantly worse fit to the data.

622 Focusing on the standing-source model at the most likely selected site, we can obtain parameter estimates  
623 for the strength of selection ( $s$ ), standing frequency of the beneficial allele ( $g$ ), and the amount of time that  
624 the beneficial allele has been standing in both mine populations after they have been isolated but prior to  
625 selection ( $t$ ). The strength of selection and starting frequency of the allele are confounded (Figure 8c) as  
626 expected. Our maximum composite log-likelihood parameter estimates suggest selection was relatively strong  
627 ( $>0.02$ ) and the allele was not standing at very high frequencies ( $< 10^{-4}$ ) when selection began. We see the  
628 maximum composite log-likelihood is obtained when the standing time ( $t$ ) is approximately 646 generations  
629 (Figure 8b). As the Copperopolis *Mimulus* are annual, this corresponds to 646 years. We obtained 95%  
630 parametric-bootstrap confidence interval of [364, 9525] generations (years), by simulating under the standing-  
631 source at our MCLE (see Appendix A.3). This time also has the interpretation of the minimum age of the  
632 standing variant as it has been standing for at least this amount of time and potentially longer in the source  
633 population. As copper mining started in 1861 in this region (Aubury, 1902), this suggests the tolerance allele  
634 was present prior to the onset of mining again consistent with the variant being a standing variant when  
635 selection began.

636 There is little information about the source population of the standing variant (we obtain identical  
637 likelihood surfaces for either copper population as the source, see Figure S7a). This is perhaps unsurprising  
638 as there is relatively little hierarchical structure among the populations. Additionally, we tested the standing  
639 variant model with no source and saw no difference in the likelihood surfaces over the proposed selected sites  
640 (Figure S7a). The maximum composite-likelihood estimate of  $t$  is higher for the models of standing variation  
641 with a source than the simple model of standing variation (see Figure S7b). This is likely because making  
642 one of the populations a source of the standing variant increases the covariance around the selected site  
643 among the selected populations, as described in Appendix A.4, and so the model compensates by increasing  
644 the rate of decay of this covariance.

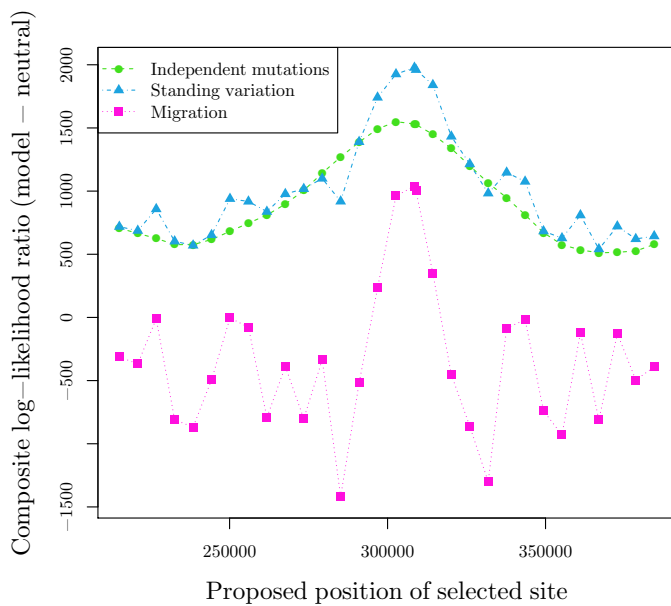

(a)

Figure 8: **Inference results for *Mimulus guttatus* copper tolerance adaptation on Scaffold8.** (a) Composite log-likelihood ratio of given model relative to neutral model of no selection as a function of the proposed selected site. We show likelihoods for the standing-source model maximizing over possible sources, but all results can be seen in Figure S7a.(b, c) MCLE of parameters in standing variation model with position 308503 as selected site. (b) Profile composite log-likelihood surface for minimum age of standing variant, maximizing over other parameters, with peak at 646 generations (c) Composite log-likelihood surface for strength of selection versus frequency of standing variant. Blue circles represents point estimate of joint MCLE ( $\hat{s} = 0.034$ ,  $\hat{g} = 10^{-7}$ ).  $t$  is held constant at MCLE of 646 generations.

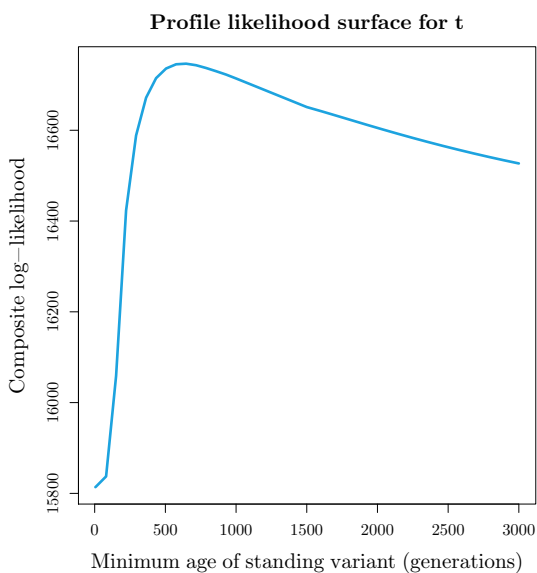

(b)

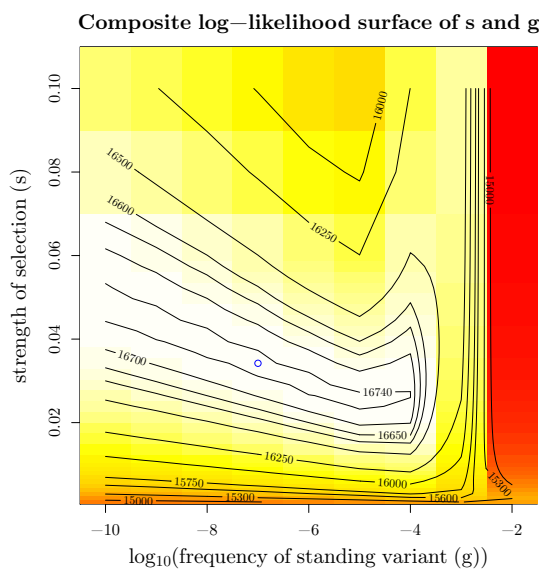

(c)

## 645 4.2 Industrial pollutant tolerance in *Fundulus heteroclitus*

646 We demonstrate how our method can be extended to more complex population scenarios. Populations of  
647 the Atlantic killifish, *Fundulus heteroclitus*, have repeatedly adapted to typically lethal levels of industrial

648 pollutants (Nacci et al., 1999, 2010). Reid et al. (2016) have sequenced 43-50 individuals from four pairs of  
649 pollutant-tolerant and sensitive populations along the U.S. Atlantic coast (see Figure 9a), sequencing each  
650 individual to 0.6-7X depth. The southern pair of populations form a distinct clade relative to the northern  
651 populations, consistent with a phylogeographic break centered on New Jersey (Duvernell et al., 2008).

652 Reid et al. (2016) found that a number of the strongest signals of recent selection are shared between all  
653 tolerant populations, suggesting genotypic convergent adaptation. We focus our method on their strongest  
654 signal of selection, Scaffold9893 (the scaffold containing the aryl hydrocarbon receptor interacting protein  
655 (AIP) gene), where all four pairs of tolerant/sensitive populations sampled show high levels of differentiation.  
656 Here, we test the hypotheses that all four tolerant populations show convergent adaptation due to our three  
657 previous modes of independent mutation, migration, or selection on shared ancestral variation. For our  
658 standing variation model, we specified the source of the standing variant (as described in Appendix A.4).  
659 We also test the hypotheses that there is an independent mutation in the southern tolerant population while  
660 the three northern populations are sharing a sweep at this locus, either due to migration between populations  
661 or selection on variation present in the ancestor of the Northern populations. This latter set of hypotheses  
662 is consistent with the fact that Reid et al. (2016) detect a shared haplotype in the three northern tolerant  
663 populations while a different haplotype appears to have swept in the southern tolerant population. We  
664 estimated the  $\mathbf{F}$  matrix from four scaffolds that show no strong signal of selection, and it is shown in Table  
665 S9. We use  $N_e = 8.3 \times 10^6$  and  $r_{BP} = 2.17 \times 10^{-8}$  (N. Reid personal communication).

666 The results are summarized in 9b. For all models with migration or selection on standing variation, we  
667 plot the maximum composite log-likelihood for the most likely source at each location of the selected site  
668 (to reduce the number of lines plotted, see Figure S9 for the full figure). We see the model with the highest  
669 composite log-likelihood is when convergence is due to selection on shared standing variation in the North  
670 and an independent mutation in the southern tolerant population. This occurs when the selected site is at  
671 approximately position 1.96 Mbp on the scaffold.

672 To assess the significance in the composite log-likelihoods of this model and the other models tested, we  
673 simulate 100 datasets under each model at their MCLE (see Appendix A.3 for details). We calculate the  
674 composite log-likelihood ratio for each simulated dataset to compare the standing variation in the North  
675 with an independent mutation in the South model to the others models used for simulation. We calculate  
676 the composite likelihoods under the same parameter space as used for the original data (Table S10), holding  
677 the location of the selected site and the source population constant at their MCLEs used for simulation.  
678 For the neutral model and the three models where all four tolerant populations have the same mode of  
679 convergence, the observed composite log-likelihood ratio was far outside the range of values obtained from  
680 the simulations (see Table S11 for all results), suggesting these models offer a significantly worse fit to the  
681 data (parametric-bootstrap p-value  $< 1/100$ ). However, this is not true for the model where migration is  
682 occurring in the three Northern selected populations while there is an independent mutation at the same  
683 locus in the Southern tolerant population. Here, the range of the difference in maximum composite log-  
684 likelihood for 100 simulations is [-24675, 38997], while the observed difference is 8121 (parametric-bootstrap  
685 p-value = 0.58; Figure S10). Thus we are unable to discern these models at their MCLEs.

686 Under the highest likelihood model of standing variation in the North and an independent mutation at  
687 the same locus in the South, we obtain the maximum composite log-likelihood estimate of the minimum  
688 age of the standing variant,  $t$ , of eight generations (Figure 10a). From simulating under this model at the  
689 MCLE, we obtain a 95% parametric-bootstrap confidence interval for  $t$  of [5, 310] generations. Thus under  
690 the standing-source model, the allele has only been standing for a very short time independently in the  
691 northern populations prior to selection. This is consistent with our observed overlap for the standing variant  
692 model and migration model. The confidence interval for  $t$  does not include 0, but that is also consistent with  
693 simulations under the migration model where inferred standing times are often slightly above zero (Figure  
694 7c and Figure Figure S12). Together these results again suggest we are unable to differentiate between the  
695 models where the southernmost tolerant population has an independent mutation and the three northern  
696 populations are sharing the beneficial allele, either via migration or selection on the same young standing  
697 variant.

698 We see partial confounding of the strength of selection and the frequency of the standing variant (Figure  
699 10b) but our results indicate selection has been very strong ( $>0.3$ ) and the allele was initially at a very low  
700 frequency ( $< 10^{-6}$ ). For the migration in the North model, we obtain similar MCLE of  $s$  of 0.4. Lastly, both  
701 the standing variation or migration in the North models has the highest composite log-likelihood when the

702 source population of the standing variant is T3, the southernmost population sampled in the North (standing  
 703 variation composite log-likelihood = 547060, migration composite log-likelihood = 537744), but this model  
 704 may not be distinguishable from that where the source is T2 (standing variation composite log-likelihood =  
 705 545580, migration composite log-likelihood = 533426).

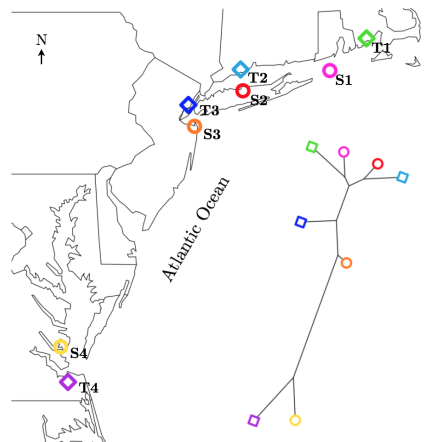

(a) Map of sampled killifish populations with phylogenetic tree, showing that the southern pair (T4, S4) are more distant than other populations. Tree is estimated from genome-wide biallelic SNP frequencies using Phylogeny Inference Package (PHYLIP) Gene Frequencies and Continuous Characters Maximum Likelihood (CONTML) module (see Reid et al. (2016) for more information).

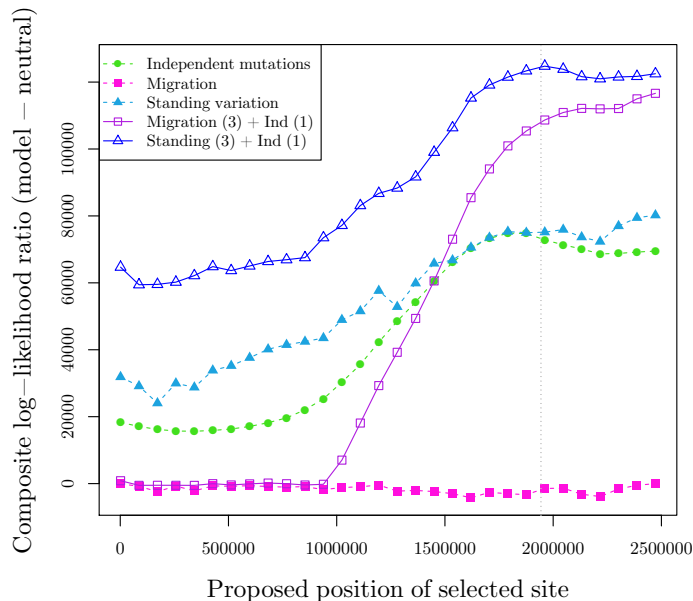

(b) Composite log-likelihood ratio of given model relative to neutral model of no selection as a function of the proposed selected site. Closed points represent models where all four populations have same convergent mode while open points represent Southern population (T4) having an independent mutation at the proposed selected site. We show likelihoods maximizing over possible sources, but all results can be seen in Figure S9. The AIP locus position is marked by the vertical, dashed gray lines.

Figure 9: Inference results for *Fundulus heteroclitus* pollutant tolerance adaptation on Scaffold9893

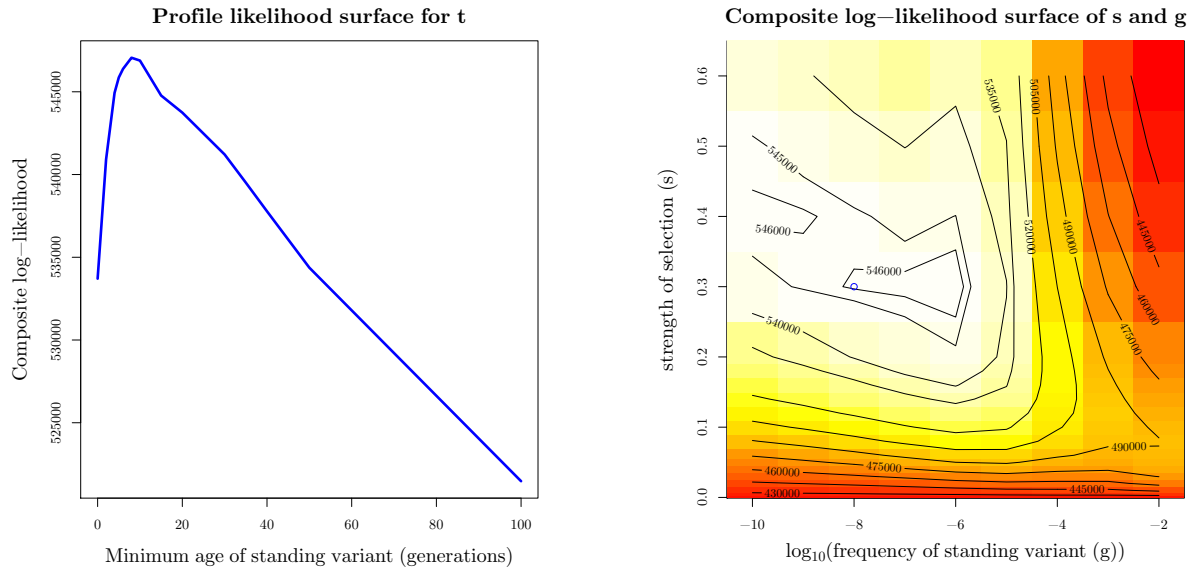

(a) Profile composite log-likelihood surface for minimum age of standing variant, maximizing over other parameters, showing the beneficial allele has been standing for a very short amount of time in our three northern populations (8 generations).

(b) Composite log-likelihood surface for strength of selection versus frequency of standing variant. Blue circle represents point estimate of joint MLE ( $\hat{s} = 0.3$ ,  $\hat{g} = 10^{-8}$ ).  $t$  is held at MLE of 8 generations.

Figure 10: The composite log-likelihood surfaces for the parameters for *Fundulus heteroclitus* convergent data in combined standing variation and independent sweep model with position 1961198 on Scaffold9893 as selected site and population T3 as source.

## 5 Discussion

In this paper we have presented a novel approach to identify the loci involved in convergent adaptation and to distinguish among the three ways genotypic convergence can arise: selection on (1) independent mutations, (2) a variant standing independently in the selected populations, and (3) beneficial alleles introduced via migration. We leverage the effects selection has on linked neutral sites via a coalescent-based model approach that captures many of the heuristics that have been used in previous studies. This approach also allow us to potentially distinguish between more subtle models, such as the origin and the direction of gene flow of a beneficial allele, since they are explicitly modeled in our framework. Our approach takes advantage of information among all of the population samples simultaneously while accounting for population structure. Therefore, it naturally accommodates information from across multiple samples, rather than just pairs of populations, and thus offers a number of advantages in identifying the mode of convergence over other approaches. We provide the relevant R code for our approach in <https://github.com/kristinmlee/dmc>.

**Distinguishing among models** We have demonstrated that our method is able to accurately distinguish among modes of convergent adaptation, across a relatively wide parameter space, in simulated data. However, we do see some confounding of models in particular regions of parameter space. In particular, we see the patterns generated from a model of selection on ancestral standing variation can look like our expectations for the other two modes of convergent adaptation for extreme values of the parameter  $t$ , the time the beneficial allele has been standing time independent in the selected populations.

When  $t$  is small, we see confounding between the standing model and a model of convergence due to gene flow. The two models are very similar since in our standing variation model, as  $t \rightarrow 0$ , the covariance in the deviations of a neutral allele between selected populations approaches the variance within a selected



728 population. The strong overlap in models is especially true when we have a source for the standing vari-  
729 ant. Intuitively, this indicates that the beneficial allele is on a haplotype that is mostly shared among the  
730 selected populations. This can be due to a very young standing variant shared amongst very closely-related  
731 populations from an ancestral population, a standing variant that was shared by gene flow before selection,  
732 or by the selected haplotype quickly moving across populations by gene flow after selection began (which  
733 are all closely related models, see Welch and Jiggins, 2014, for additional discussion).

734 To illustrate distinguishing between these possibilities we now briefly revisit our applications. The North-  
735 ern tolerant killifish populations, under a standing variation model with gene flow prior to selection, have a  
736 very low estimate of the standing time  $t$  (8 generations with 95% CI [5, 310] generations). However, given  
737 this very low estimate of  $t$ , the allele cannot have been standing since the common ancestral population of  
738 T1, T2, T3 (which we estimate to coalesce more than 800 thousand generations ago, assuming no migration,  
739 using the estimation procedure outline in Appendix A.3.1). Therefore, the allele must be shared by gene  
740 flow among the three populations and it seems likely that the migration of the allele occurred either after  
741 selection began in one of the populations or very shortly before, with our parametric-bootstrapping approach  
742 suggesting we are not able to discern these two models. Interestingly, Reid et al. find no clear signals of  
743 admixture from migration elsewhere in the genome between Northern tolerant populations, suggesting that  
744 the migration of this allele might be a rare event, although we note that this may reflect a lack of power to  
745 detect gene flow.

746 The case for adaptation from ancestral standing variation is more clear for the *Mimulus* copper tolerance  
747 example. Here, the estimate of  $t$  is much greater than zero (646 generations with 95% CI [364, 9525]  
748 generations) and indeed older than the putative selection pressure (approximately 150 generations ago).  
749 Additionally, the standing variant model considerably outperforms the other models and the results of our  
750 parametric-bootstrapping approach support this. In this case, we again favor the model that incorporates  
751 gene flow prior to selection on standing variation. The level of neutral differentiation of the mine populations  
752 very likely reflects much more than 646 generations of drift (see Appendix A.3.1), thus it seems likely that  
753 this allele is shared between the mine populations by gene flow but that the allele was standing in both  
754 populations for some time before selection began. Together these applications show distinguishing among  
755 models of convergence is possible in some cases, but may require extra knowledge of population history to  
756 aid our inference and understanding.

757 Conversely, when  $t$  is large, we see a collapse of our standing model onto a model of convergence due to  
758 independent mutations in our selected populations. This intuition holds forwards in time since as  $t \rightarrow \infty$   
759 generations, recombination in our isolated populations independently breaks down the similarity of the  
760 haplotypes carrying the beneficial mutation. Thus, when selection for the standing variant begins, even  
761 tightly-linked, hitchhiking neutral alleles will not be shared between populations more than expected by  
762 chance. This is also the case when beneficial alleles arise multiple times independently. For example, in the  
763 case of the killifish, it is formally possible that the signal of independent selection in the Southern tolerant  
764 population is actually due to a very old standing variant shared with the Northern populations where there  
765 is almost no overlap between the Southern and Northern tolerant populations in the haplotype the selected  
766 allele is present on, even close to the selected site. As the precise functional variant(s) in this swept region are  
767 currently unknown (Reid et al., 2016) it is hard to totally rule out this very old standing variant hypothesis.  
768 In other cases it may be possible to rule out the standing variant hypothesis with very large parameter  
769 estimates of  $t$  if we know more about the population histories (i.e. our selected populations split more  
770 recently than the standing time). Additionally, it may be possible to totally rule out the standing variant  
771 hypothesis in cases where if the functional variants can be tracked down to clearly independent genetic  
772 changes (e.g. Tishkoff et al., 2007). However that degree of certainty may be difficult to achieve in many  
773 cases.

774 **Extendibility and flexibility of our approach** We show the applicability of our method on two em-  
775 pirical examples of convergent adaptation: the evolution of copper tolerance in *Mimulus guttatus* and of  
776 pollutant tolerance in *Fundulus heteroclitus*. The latter exemplifies the extendibility and flexibility of our  
777 approach. As the number of selected populations increase, our potential number of hypotheses grows since  
778 any grouping of two or more populations could share selection due to migration or standing variation. Ad-  
779 ditionally, with more populations, we have more potential sources of the beneficial allele in the migration  
780 model. Our model could also be extended to have selection occurring in some of the adapted populations

781 and the neutral model in others, to identify genomic regions that are not experiencing convergent adaptation  
782 among all populations sharing the selected environment. These models are all relatively easy to implement  
783 into our framework; however, the sheer number of possible hypotheses as the number of populations grows  
784 will likely call for some more systematic way of implementing these models and exploring their relationships.

785 **Caveats and possible extensions** Studying repeated evolution has long played a key role in evolutionary  
786 biology as a tool to help identify the ecological and molecular basis of adaptation. It is worth noting with  
787 this approach, we are able to identify sweeps in the same region and whether they appear to be shared or  
788 independent. However, in the scale of an entire genome, it may be possible for two, functionally unrelated  
789 sweeps to overlap. In the case of adaptation via independent mutations across multiple populations, it is  
790 especially hard to determine whether selection at the same site was acting on the same phenotype. It is  
791 potentially more plausible to claim that the phenotype and selection pressure are shared among populations  
792 in cases where the swept haplotype is shared. Ultimately, in demonstrating convergence, we will have to rely  
793 on a range of evidence. Shared sweeps can offer one substantial piece of evidence, particularly when we are  
794 studying recent adaptation to a strong selective pressure that is distinct to the adapted populations.

795 In addition to assuming that the same locus is under selection in all adapted populations, we assume a  
796 single selected change underlies the sweep within a population and that recombination is free to break down  
797 associations between neutral alleles and this selected variant. If, for instance, selection acts on an epistatic,  
798 haplotypic combination of allele that sweeps, a long haplotype could be shared between populations not due  
799 to recent migration but because selection acts against recombinants breaking up the haplotype (Kelly and  
800 Wade, 2000). Convergent adaptations due to shared inversions also violate the assumptions of our method.  
801 Inversions can repress recombination across the entire inversion (see Kirkpatrick, 2010, for a recent review).  
802 Inversions significantly alter both neutral and selective model expectations (e.g. Guerrero et al., 2012) and  
803 could lead to long shared haplotypes among populations even if the shared inversion is old. It may be  
804 possible to use our approach to model the decay in coancestries outside of the inverted region, but this  
805 requires knowledge of the inversion and its break points *a priori* and a detailed knowledge of recombination  
806 rates surrounding the inversion.

807 Throughout this paper we assume that the sweeps have fixed recently, and it will be important to relax  
808 this assumption. In these cases, models of migration that include selection against maladaptive migrants  
809 (Barton and Bengtsson, 1986; Charlesworth et al., 1997; Roesti et al., 2014) will be important to consider.  
810 Long-term selection against migrant alleles (i.e. due to local adaptation) lowers the effective migration  
811 rate at linked neutral sites and so will distort the covariance relationships among populations (and may in  
812 some cases confound the signal of the mode of convergence). These deviations could be incorporated into  
813 our models, allowing us to perform inference under these models. However, in practice we would likely be  
814 underpowered, as we only model segregating sites we cannot (in the current framework) fully account for  
815 selection that deepens the absolute divergence among particular populations.

816 Additionally, our framework could be extended in various ways to both leverage more information and  
817 model more biologically relevant or interesting scenarios. There is more information to be gained from  
818 haplotypes and associations between sites that we fail to include in our composite likelihood when we sum  
819 across information from individual sites. Here we use this approach to analyze genomic regions that we  
820 *a priori* assume to be under convergent selection. In part this is due to the phylogenetic relationships  
821 among the populations (with convergent populations not being sister to each other). Additionally, we could  
822 then model ancestral sweeps to address whether sister populations sharing an adapted phenotype is truly  
823 convergent or simply due to selection in their ancestor Racimo (2016). We are currently working on ways to  
824 efficiently extend this approach to the application of genome-wide data to scan for genomic regions exhibiting  
825 convergence.

## 826 6 Acknowledgements

827 We wish to thank members of the Coop lab for helpful discussion and feedback on earlier drafts. We'd  
828 also like to gratefully acknowledge Noah Reid, Andrew Whitehead, John Willis, and Kevin Wright sharing  
829 their data and thoughtful comments. We thank Nicolas Bierne, Joachim Hermisson, and an anonymous  
830 reviewer for valuable suggestions on an earlier draft. This work was supported by the National Science

831 Foundation Graduate Research Fellowship awarded to K. Lee (1148897) and by grants from the National  
832 Science Foundation under Grant No. 1353380 to John Willis and G. Coop and the National Institute of  
833 General Medical Sciences of the National Institutes of Health under award numbers NIH R01 GM108779  
834 awarded to G. Coop.

## 835 A Appendix

### 836 A.1 Coalescent interpretation of covariances and F-matrix estimation

Let  $x_{il}$  be the allele frequency of allele 1 in population  $i$  at locus  $l$ , and that the frequency of this allele in the ancestral population is  $\epsilon_l$ . Consider the covariance  $\text{Cov}(\Delta x_{il}, \Delta x_{jl})$  over replicates of the drift processes at locus  $l$ . We can write

$$\text{Cov}[(x_{il}\epsilon_l), (x_{jl} - \epsilon_l)] = \mathbb{E}[(x_{il} - \epsilon_l)(x_{jl} - \epsilon_l)] \quad (\text{A.1})$$

$$= \mathbb{E}[x_{il}x_{jl}] - \epsilon_l^2 \quad (\text{A.2})$$

837 which follows from the fact that  $\mathbb{E}[x_{il}] = \mathbb{E}[x_{jl}] = \epsilon_l$ . We can interpret  $\mathbb{E}[x_{il}x_{jl}]$  as the probability that we  
 838 sample a single allele in  $i$  and an allele in  $j$  and that they both are of type 1. Taking that interpretation,  
 839 assuming that there is no mutation,  $\mathbb{E}[x_{il}x_{jl}]$  is the probability that, tracing back a coalescent lineage from  
 840  $i$  and a lineage from  $j$ , both lineages trace back to type 1 alleles in the ancestral population. Let our pair  
 841 of lineages drawn from  $i$  and  $j$  coalesce with probability  $f_{ij}$ . If our lineages coalesce before reaching the  
 842 ancestral population then they will be identical by descent, and share the ancestral choice of allele. Therefore,  
 843 we can write

$$\mathbb{E}[x_{il}x_{jl}] = (1 - f_{ij})\epsilon_l^2 + f_{ij}\epsilon_l \quad (\text{A.3})$$

844 Then we can rewrite the covariance

$$\text{Cov}(\Delta x_{il}, \Delta x_{jl}) = f_{ij}\epsilon_l(1 - \epsilon_l), \quad (\text{A.4})$$

845 and for the variance we set  $i = j$ . Thus, under a model of genetic drift alone, we can interpret the entries of  
 846 our covariance matrix as expressions of the underlying coalescent probabilities.

847 **Estimating F** In the main text we assume that we have estimates of our neutral coancestry matrix **F**. We  
 848 now describe how we obtain these. From above, Equation A.3, the expectation of  $x_{il}x_{jl}$  across loci is

$$\mathbb{E}_l[x_{il}x_{jl}] = \mathbb{E}_l[(1 - f_{ij})\epsilon_l^2 + f_{ij}\epsilon_l] \quad (\text{A.5})$$

849 Therefore we can write estimate  $f_{ij}$  as

$$f_{ij} = \frac{\mathbb{E}_l[x_{il}x_{jl}] - \mathbb{E}_l[\epsilon_l^2]}{\mathbb{E}_l[\epsilon_l(1 - \epsilon_l)]} \quad (\text{A.6})$$

850 We can obtain an unbiased estimate of  $\mathbb{E}_l[\epsilon_l^2]$  and  $\mathbb{E}_l[\epsilon_l(1 - \epsilon_l)]$  using the sample allele frequencies from two  
 851 populations on either side of the root of the population phylogeny (see Supplement of Lipson et al., 2013).  
 852 Let  $i'$  and  $j'$  be a pair of populations that span the root of the population tree, then we can use the estimate

$$\mathbb{E}_l[\epsilon_l(1 - \epsilon_l)] = \mathbb{E}_l\left[\frac{1}{2}x_{i'l}(1 - x_{j'l}) + \frac{1}{2}(1 - x_{i'l})(x_{j'l})\right] \quad (\text{A.7})$$

853 Likewise, we use the estimate

$$\mathbb{E}_l[\epsilon_l^2] = \mathbb{E}_l\left[\frac{1}{2}x_{i'l}(x_{j'l}) + \frac{1}{2}(1 - x_{i'l})(1 - x_{j'l})\right] \quad (\text{A.8})$$

854 An estimate of the term  $\mathbb{E}_l[x_{il}x_{jl}]$  can be obtained by using the sample frequency of allele 1 in populations  
 855  $i$  and  $j$ . However, as we only have a sample from the population frequency we need to account for the finite  
 856 sampling bias within populations ( $i = j$ ). Let  $n$  be the sample size in population  $i$ , then

$$f_{ii} = \frac{\mathbb{E}_l[x_{il}^2] \frac{n}{n-1} - \mathbb{E}_l[x_{il}] \frac{1}{n-1} - \mathbb{E}_l[\epsilon_l^2]}{\mathbb{E}_l[\epsilon_l(1 - \epsilon_l)]} \quad (\text{A.9})$$

857 where our  $x$  are now sample frequencies. There is no finite-sample size correction for  $f_{ij}$ ,  $i \neq j$  and Equation  
 858 A.6 can be used directly.

859 In our simulations to show the effect of selection on the coancestry coefficients (Figure 3), we estimate  $f_{ij}$   
 860 in bins of fixed genetic size moving away from the selected site. We do this by approximating the expectations  
 861 in the numerator and denominators in Equations A.6 and A.9 by the average of the expression over all of  
 862 the SNPs that fall in a given genetic distance bin over all of the relevant simulations. To account for biases  
 863 induced by defining the allele of interest, we randomize the reference allele at each SNP.

## 864 A.2 Simulation implementation details

865 We perform coalescent simulations using `mssel`, a modified version of `ms` (Hudson, 2002) that allows  
866 for the incorporation of selection at single site (the code for this is provided in [https://github.com/  
867 kristinmlee/dmc](https://github.com/kristinmlee/dmc)). The program allows the user to specify the frequency trajectory of the selected allele  
868 through time across populations, this trajectory is then used to simulate genetic data under the coalescent  
869 model conditioning on this trajectory (using the sub-divided coalescent model Hudson and Kaplan (1988);  
870 Kaplan et al. (1991)). We generate stochastic trajectories for the selected allele across populations and  
871 describe the simulation process below. We simulate multiple instances of the stochastic trajectories and  
872 average our results across datasets generated for these trajectories. We focus on a set of four populations  
873 with relationships as shown in Figure 1. Populations 2 and 3 are adapted to a shared novel selection pressure  
874 and populations 1 and 4 are in the ancestral environment.

875 The original implementation of `mssel` assumes only a single origin of the selected allele, which occurs  
876 moving backward in time when the frequency of the derived allele goes to zero in the final population it  
877 segregates in. We modified the `mssel` source code directly to accommodate multiple origins of the selected  
878 allele as is necessary in the independent sweep model. We do so by allowing an independent origin of the  
879 selected allele in any population where the frequency of the derived selected allele goes to zero, if that  
880 population currently has a migration rate of zero to any other population containing the selected allele.

### 881 A.2.1 Generating stochastic trajectories for the selected allele

882 We generate stochastic trajectories for the selected allele to be used as input for `mssel` to generate sequence  
883 data for given convergent adaptation scenarios. We simulate the allele frequency trajectory for the selected  
884 allele forward in time using a normal deviate approximation to the simulation the Wright-Fisher diffusion.  
885 Specifically, given the frequency of the beneficial allele at time  $t$ ,  $X(t)$ , we simulate its frequency at time  
886  $t + \Delta t$  according to

$$X(t + \Delta t) \sim N(\mu_S(X(t))\Delta t, \sigma^2(X(t))\Delta t) \quad (\text{A.10})$$

887 where  $\mu_S(\cdot)$  and  $\sigma^2(\cdot)$  are the infinitesimal mean and variance of the Wright-Fisher diffusion. We set  
888  $\Delta t = 1/(2N)$ , representing one Wright-Fisher generation on the diffusion time-scale ( $2N$  generations). We  
889 set  $X(0) = g$ , the initial frequency of the beneficial allele. When selection starts from a new mutation,  
890  $g = 1/(2N)$ .

891 For all our models, the infinitesimal variance is

$$\sigma^2(X(t)) = X(t)(1 - X(t)), \quad (\text{A.11})$$

892 representing the effect of genetic drift.

893 For populations not impacted by migration, we condition our trajectory on the beneficial allele going to  
894 fixation forward in time. To do this we use the conditional infinitesimal mean

$$\mu_S(X(t)) = \frac{2NsX(t)(1 - X(t))}{\tanh(2NsX(t))} \quad (\text{A.12})$$

895 (see Przeworski et al., 2005; Berg and Coop, 2015, for previous applications). We simulate this process  
896 forward in time till fixation is reached. Given that we are assuming the sweeps completely recently, we have  
897 fixation occur at time zero so that the time of a new mutation is determined by the time of the sweep.

898 **Migration model** In the case of our migration model, there is one way migration from population  $i$  into  $j$ .  
899 The trajectory of  $X_i$  is simulated first forwards in time, conditioning on fixation, using the above approach.  
900 We then simulate the frequency in population  $j$  starting from  $X_j(0) = 0$ , with the infinitesimal mean

$$\mu_S(X_j(t)) = 2NsX_j(t)(1 - X_j(t)) + 2Nm(X_i(t) - X_j(t)) \quad (\text{A.13})$$

901 (expanded from Ewens, 2004). We simulate the process forward in time until the selected allele reaches  
902 fixation in both populations. The first population to reach fixation is held at frequency 1 until the other  
903 population fixes for the beneficial allele.

904 **Standing variation model.** We define the standing variation trajectory as having three phases, the  
905 neutral phase, the standing phase, and the selected phase. To specify a trajectory in which the beneficial  
906 allele has been standing at frequency  $g$  for time  $t$ , we simply hold the allele frequency constant for this  
907 amount of time. We simulate a stochastic neutral trajectory of our beneficial allele from frequency  $g$  to 0  
908 backwards in time according to

$$X(t - \Delta t) \sim N(\mu_N(X(t))\Delta t, \sigma(X(t))\Delta t) \quad (\text{A.14})$$

909 using the infinitesimal mean conditional of the neutral allele going to loss

$$\mu_N(X(t)) = -X(t) \quad (\text{A.15})$$

910 (see Przeworski et al., 2005; Berg and Coop, 2015, for previous applications). We simulate the selection  
911 phase forward in time for  $2 \log(1/g)/s$  generations. If the beneficial allele has reached fixation before this  
912 time, it is held constant at frequency 1 for the remaining time. If not, the trajectory is simply stopped at this  
913 time. This allows for the interpretation of the standing time and the time of the onset of selection to be the  
914 same throughout simulations. For the whole trajectory of a beneficial allele, we paste together these three  
915 components: neutral increase of allele from frequency 0 to  $g$ , the standing phase at frequency  $g$  for time  $t$   
916 generations, and the selective phase. For populations not experiencing selection, the beneficial allele is kept  
917 at frequency  $g$  for the entire length of the trajectory. We acknowledge this is an untested approximation but  
918 think it has little impact on our results. The frequency of the standing variant matters mostly for estimating  
919 the duration of the sweep within populations, so its frequency during this standing phase is not as important  
920 as the frequency at the onset of selection. Additionally, we assume that  $g$  is small such that the probability  
921 of recombining off onto the other background during this phase is simply  $r$ . The frequency of the variant  
922 during the standing phase does impact the probability of coalescing before recombination (or vice versa)  
923 during this phase, but only weakly.

## 924 A.2.2 Details of coalescent simulations

925 In this section we give the details of the coalescent simulations. The `mssel` command lines can be found in  
926 Supplement S3. The `mssel` input can be interpreted as follows,

```
927 ./mssel nsam_tot nreps nsam_anc nsam_der trajFile locSelSite -t  $\theta$  -r  $\rho$  nsites  
928 -I npops nAnc_pop1 nDerv_pop1 ... nAnc_popi nDerv_popi
```

929 For all of the simulations we generate neutral allele frequency data for 10 samples from each of 4 popula-  
930 tions. The populations are related to each other as shown in Figure 1. Note, we did 1000 replications of the  
931 simulations for parameters used to generate comparisons of average simulations coancestry coefficients com-  
932 pared to theoretical expectations. 100 replications were done for simulations used for parameter estimates  
933 and model comparisons. For simulations used for both, the first 100 runs were used.

934 **Independent sweep model.** We generated beneficial allele frequency trajectories under four different  
935 selection coefficients:  $s = [0.005, 0.01, 0.05, 0.1]$  under the independent sweep model with  $N_e = 100,000$ . We  
936 set  $r$ , the per generation probability of cross-over between ends of the simulated locus, to 0.005. The neutral  
937 mutation rate,  $\mu$ , for the entire locus is the same as  $r$ . We also simulate, with `ms` the same population  
938 structure with no selection to generate data to estimate the neutral coancestry matrix,  $\mathbf{F}$ .

939 **Standing variation model.** With  $s = 0.01$  and  $g = 0.001$ , we generated beneficial allele frequency  
940 trajectories for standing times  $t = [50, 250, 500, 1000, 5000]$  generations under the standing variation model  
941 with  $N_e = 10,000$ . Our  $t$  references the time that the populations have been independent. Therefore,  
942 we adjusted the split times to ensure that the  $t$  of interest corresponded to the duration of time that the  
943 selected populations had the standing variant prior the populations joining in the ancestral population. The  
944 population split times were determined to ensure selection started after the populations were completely  
945 isolated and to maintain a similar ratio of time for 4 independent populations to 2 ancestral populations.  
946 We again set  $r = \mu = 0.005$ . Again, neutral regions were simulated in `ms` using the same population structure  
947 (i.e. each parameter set had its own neutral data generated).

948 **Migration model.** Lastly, we simulated under the migration model with  $m = [0.0001, 0.001, 0.01, 0.1]$ ,  
949 holding  $s = 0.01$  for  $N_e = 10,000$ . Again, we simulated 10 samples from 4 populations related to each other  
950 as specified in Figure 1. Now, in `mssel`, we specify migration to start just prior to origin of the beneficial  
951 allele in the source population and to continue until the sweep has reached fixation (time zero in the past  
952 since we fix sweeps to complete at the end). We set population 2 to be the source and have  $4N_em$  migrants  
953 from population 2 into population 3 each generation. We again set  $r = \mu = 0.005$ . Neutral regions were  
954 again simulated using `ms`. Each set of parameters has its own neutral data generated as the migration rate  
955 impacts neutral coancestry as well.

### 956 **A.2.3 Interpretating `mssel` output**

957 The output from `mssel` and `ms` is in the form of haplotypes for each of the sampled chromosomes at  
958 polymorphic sites in addition to their positions on a scale of  $(0, 1)$ . We use this to calculate sample allele  
959 frequencies at each site for each population. Prior to performing further estimations or analyses with these  
960 neutral allele frequencies, we randomize the reference allele so that there is no bias resulting from which allele  
961 was called ancestral or derived. We exclude sites where the average allele frequencies across populations are  
962 less than 5% or greater than 95%.

### 963 **A.2.4 Composite likelihoods of simulated data under all models details**

964 We calculated the composite log-likelihoods of each the simulated datasets under all models, including the  
965 neutral model, with the same parameter space shown in Table S1.

### 966 **A.2.5 Maximum likelihood estimate of parameters from simulated data under correct model**

967 We also calculated the composite log-likelihoods of each the simulated datasets under the correct model used  
968 to generate the data now with a more dense grid of parameters to obtain better estimates of the MCLE of  
969 each parameter. We allowed  $g$  to vary in the calculations of the MCLEs under the standing variation model.  
970 See Table S2, Table S4, Table S5.

### 971 **A.2.6 Inference details: mean-centering allele frequencies and covariances, sample size cor- 972 rection, and speed-ups**

973 Given that we do not know the true ancestral mean at locus  $l$ ,  $\epsilon_l$ , we use the mean of the present-day sample  
974 allele frequencies at this locus,  $\bar{x}_l = \frac{1}{k} \sum_{i=1}^K x_{i,l}$ . When mean-centering, we lose a degree of freedom so in  
975 calculating the likelihood it is necessary to drop information from one population. Since the information  
976 from the dropped population is incorporated in the mean, the choice of the dropped population is arbitrary.  
977 In matrix form, the mean-centered allele frequencies with one dropped population can be expressed as

$$\vec{x}'_i = \mathbf{T}\vec{x}_i \quad (\text{A.16})$$

978 where  $\mathbf{T}$  is an  $K - 1$  by  $K$  matrix with  $\frac{K-1}{K}$  on the main diagonal and  $-\frac{1}{K}$  elsewhere. Prior to mean-  
979 centering, we randomize the reference allele at each SNP to account for biases induced by defining the allele  
980 of interest.

981 Now, we model the mean-centered allele frequencies as multivariate normal around mean zero with  
982 covariance proportional to a mean-centered parameterized covariance matrix ( $\mathbf{F}^{(S)'}$ ) as

$$\vec{x}'_i \sim \mathcal{N}\left(\vec{0}, \bar{x}_l(1 - \bar{x}_l)\mathbf{F}^{(S)'}\right) \quad (\text{A.17})$$

983 where we use the average present day allele frequency across populations at the locus,  $\bar{x}_l$ , as an estimate of  $\epsilon_l$   
984 in the site-specific term in the covariance. We note that  $\bar{x}_l(1 - \bar{x}_l)$  is a slightly downwardly biased estimate  
985 of  $\epsilon(1 - \epsilon)$ , but for our purposes it seems sufficient to include this term as a locus-specific adjustment to the  
986 expected covariance.

987 To obtain the corresponding mean-centered covariance matrix, dropping the same population, we can  
988 apply the following matrix operations,

$$\mathbf{F}^{(S)'} = \mathbf{T}\mathbf{F}^{(S)}\mathbf{T}^\top. \quad (\text{A.18})$$

989 this new matrix is  $K - 1$  by  $K - 1$  and full rank.

990 Before mean-centering,  $\mathbf{F}^{(S)}$ , we apply a sample size correction to correct for the finite sampling bias.  
 991 We add  $1/n_i$  to the diagonal where  $n_i$  is the sample size in population  $i$ . We take twice the number of  
 992 diploid individuals sampled in population  $i$  as  $n_i$  for data applications. In simulations, we use the number of  
 993 chromosomes sampled in population  $i$  as  $n_i$ . Note that both this mean-centering and sample size correction  
 994 is also performed on the neutral matrix,  $\mathbf{F}$  before likelihood calculations under a neutral model with no  
 995 selection.

996 To decrease some of the computational time involved in our likelihood calculations, we precompute the  
 997 mean-centered covariance matrices with selection,  $\mathbf{F}^{(S)'}$ , for given bins of distance away from a putative  
 998 selected site. We first divide our distances in our window into 1000 bins and take the midpoint of the  
 999 distances in these bins to calculate  $\mathbf{F}^{(S)'}$  as this matrix is a function of distance. To avoid the costly step  
 1000 of recomputing the corresponding inverses and determinants needed for likelihood calculations, we do this  
 1001 step first and use these values for all SNPs in a given bin, and store them and reuse them over all locations  
 1002 of the selected site.

1003 Thus, we calculate the likelihood of mean-centered allele frequencies,  $\vec{x}_l'$ , given our model  $M$  and its  
 1004 parameters  $\Theta_M$ , a given locus  $l$  as

$$P(\vec{x}_l' | \mathbf{F}^{(S)'}(r_l, M, \Theta_M)) = \frac{\exp(-\frac{1}{2}\vec{x}_l'^T (\mathbf{F}^{(S)'})^{-1}(\vec{x}_l(1 - \vec{x}_l))^{-1}\vec{x}_l')}{\sqrt{2\pi^k(\vec{x}_l(1 - \vec{x}_l))^k \det \mathbf{F}^{(S)'}}} \quad (\text{A.19})$$

1005 where  $k = K - 1$ , the rank of matrix  $\mathbf{F}^{(S)'}$ .

1006

### 1007 A.3 Parametric bootstrapping approach details

1008 To carry out the parametric-bootstrapping approach, we again perform coalescent simulations using `mssel`  
 1009 for simulations with selection and `ms` for neutral simulations. We specify the number of populations and the  
 1010 sample size for each populations (twice the number of individuals sampled). Now, instead of specifying  $\theta$ , we  
 1011 specify the number of segregating sites as the number of SNPs in our window of interest. We also simulate  
 1012 with the same population-scaled recombination rate and number of sites between which recombination can  
 1013 occur as the number of base pairs in our analysis window. To match the population-scaled recombination rate,  
 1014 we take the genetic map of our region  $r$  and scale it to be  $4N_e r$ , assuming that recombination is uniformly  
 1015 distributed over our region. We down-scaled the effective population size for computational efficiency in the  
 1016 generation of the simulations, which impacts both  $\rho$  and the times in the trajectories of the beneficial allele  
 1017 by a linear rescaling. Additionally, we specify the location of the selected site ( $\ell$ ) to be at the MCLE of the  
 1018 model used for simulation.

1019 While in the rest of the paper we make use of stochastic trajectories, for the parametric-bootstrap  
 1020 simulations we generated deterministic trajectories of the selected allele to be used as input for `mssel`. This  
 1021 is because we need to set our simulations up to accommodate both the MCLE selection coefficient and the  
 1022 coalescent times within and between populations, which is somewhat fiddly to automate with fully stochastic  
 1023 trajectories across all the models. Now, we fix the time of the sweep to be

$$\frac{1}{s} \log \left( \frac{p_{t_s} q_0}{q_{t_s} p_0} \right) \quad (\text{A.20})$$

1024 where  $p_0$ , the frequency of the beneficial allele at time 0, is  $1/2N$  for a new mutation or  $g$  for the standing  
 1025 variant model. While  $p_{t_s}$ , the frequency of the beneficial allele at fixation, is set to 0.999. For the migration  
 1026 model, we start this trajectory (from  $1/2N$ ) after the delay time (Equation 10) for recipient population(s).  
 1027 We simulate with migration after  $\delta$  for a few generations. For the standing variant model with a source  
 1028 population, we start the selected allele trajectory (from frequency  $g$ ) in the recipient population(s) after  $t$   
 1029 generations. We simulate with a brief burst of migration at time  $t$  until the frequency of the beneficial allele  
 1030 goes to 0 in the recipient population(s), at a very low rate. This forces an instantaneous coalescent event  
 1031 back into our source population. The parameters ( $s$ ,  $t$ ,  $g$ ,  $m$ , and the source population) are all set to the  
 1032 MCLE of the corresponding model.



1033 We simulate each convergent and neutral model 100 times and interpret the output and calculate the  
1034 likelihood of our simulated data (as detailed in Appendix A.2) under the model used for simulations and the  
1035 model with the largest composite likelihood for the original data. The `msse1` command lines can be found  
1036 in Supplement S4.

### 1037 A.3.1 Approximating demography given a neutral $\mathbf{F}$ matrix

1038 For the parametric bootstrap we need to simulate under a model of population structure that approximately  
1039 matches that in our data. To do so we assume that our sampled populations are related through a bifurcating  
1040 population phylogeny (with no neutral migration). While this is a crude approximation it allows us a good  
1041 match to the observed  $F$  matrix of the data, and considerably simplifies the task of setting up the simulations.  
1042 In practice since our method works with these covariances, and inferring the details of population structure  
1043 is not our primary concern here, we view this as an acceptable compromise.

1044 For simulating under the approximate population structure in our data, we need to estimate join times  
1045 for population pairs. We use

$$f_{ij} \approx 1 - e^{-t_{ij}^{\text{coal}}} \quad (\text{A.21})$$

1046 where  $t_{ij}^{\text{coal}}$  is in coalescent time units to approximate the shared branch length between populations  $i$  and  
1047  $j$ , assuming no migration. Migration will impact the coancestry coefficients and thus our interpretations of  
1048 the coalescent times. For example, migration between two populations will increase their relatedness and  
1049 can make their shared branch length appear longer. We also use this approximation to compare the split  
1050 time between populations to the standing time for our adaptive alleles  $t$ , to judge whether they could have  
1051 been standing for a given time between two populations, or if migration must be invoked.

1052 To generate join times, we first solve for all  $t_{ij}^{\text{coal}}$  using A.21 from an estimated neutral  $\mathbf{F}$  matrix. We find  
1053 populations  $i$  and  $j$  with the largest  $t_{ij}^{\text{coal}}$ . We approximate the join time as the average of the differences  
1054 between the total time associated with each population (i.e.  $t_{ii}^{\text{coal}}$  and  $t_{jj}^{\text{coal}}$ ) and the time between them  
1055 ( $t_{ij}^{\text{coal}}$ ). This follows from assuming drift is acting additively such that  $f_{ii} \approx f_{ij} + f_i$  where  $f_i$  is the coancestry  
1056 coefficient associated with population  $i$  in isolation (see Supplement S2 for more). We then effectively join  
1057 these two populations, updating all  $t_{ik}^{\text{coal}}$  and  $t_{jk}^{\text{coal}}$  where  $k$  is any unjoined population to be the average of  
1058  $t_{ik}^{\text{coal}}$  where  $k$  and  $t_{jk}^{\text{coal}}$  where  $k$ . We repeat this procedure, joining the two remaining populations with the  
1059 largest  $t_{ij}^{\text{coal}}$  until all populations are joined. From this, we are able to specify join times for simulations that  
1060 capture the general population structure of a given  $\mathbf{F}$  matrix.

1061 The population structure used for simulation is now represented in a bifurcating tree, which may fail to  
1062 capture of the complexity represented in a given  $\mathbf{F}$  matrix. Thus, when performing the composite-likelihood  
1063 calculations we use a modified  $\mathbf{F}$  matrix estimated using the procedure detailed in A.1 with neutral data  
1064 simulated with these join times, to parameterize our models.

1065 Additionally, these estimates for the between population coalescent times, assuming no migration and a  
1066 bifurcating tree, can give us insight it is possible for the beneficial allele to have been standing for a given  $\hat{t}$   
1067 since the ancestral population or whether it is necessary to invoke the model where migration has a role in  
1068 spreading the beneficial allele prior it standing. For example, in our *Mimulus* analysis, we estimate our join  
1069 time to be 0.050 in coalescent units. Our MCLE for  $t$  under the classic standing model is 434 generations  
1070 or 0.00029 coalescent units, which is much shorter than the time in which our selected populations coalesce.  
1071 We caution against assigning too much value to these inferences, given the assumptions, but do find these  
1072 approximations to be broadly useful.

### 1073 A.4 Standing variant model with a source population

1074 When there are multiple selected populations and they do not follow a bifurcating tree structure, it is  
1075 necessary to incorporate a model that has a source population for the standing variant to have self-consistent  
1076 mean-centered covariance matrices.

1077 Let population  $l$  be a selected population and the source of the beneficial allele. In all other populations,  
1078 the beneficial allele is standing for time  $t$  generations at frequency  $g$  before the lineage returns to the  
1079 source population where it still standing at frequency  $g$  (see Figure 11). We can define pairwise coancestry

1080 coefficients for all pairs of populations under this model. Let populations  $i$  and  $j$  represent populations that  
 1081 experience selection and population  $k$  be any unselected population.

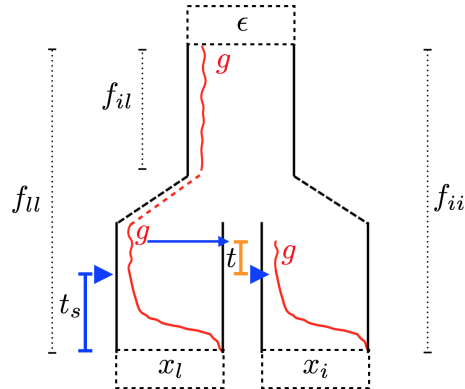

Figure 11: Trajectories of the beneficial allele (red) for the standing variant model with a source population. Populations  $l$  and  $i$  are under selection with present-day allele frequencies  $x_l$  and  $x_i$  at a neutral locus, derived from an ancestral population with allele frequency  $\epsilon$ . The populations share some amount of drift proportional to  $f_{il}$  before reaching the ancestral population. The beneficial allele is standing at frequency  $g$  in the source population,  $l$ . It migrates into population  $i$  from  $l$ , where it is standing at frequency  $g$  for  $t$  generations prior to the onset of selection, indicated by the blue triangles.

1082 Since population  $l$  is the source, its variance follows the same form as Equation 7.

$$f_{il}^{(S)} = y^2 \left( \frac{1}{1 + 4N_e r g} + \frac{4N_e r g}{1 + 4N_e r g} f_{il} \right) + (1 - y^2) f_{il} \quad (\text{A.22})$$

1083 All other selected populations have a modified variance since lineages that fail to recombine off the  
 1084 beneficial background during the sweep and fail to coalesce or recombine during the standing phase return  
 1085 to the source population. Thus,

$$\begin{aligned} f_{ii}^{(S)} &= (1 - y)^2 f_{ii} + 2y(1 - y) \left( (1 - r_t) f_{il} + (1 - (1 - r_t)) f_{ii} \right) + y^2 \left( e^{-t(2r + \frac{1}{2N_e g})} \left( \frac{1}{1 + 4N_e r g} + \frac{4N_e r g}{1 + 4N_e r g} f_{il} \right) \right. \\ &\quad \left. + (1 - e^{-t(2r + \frac{1}{2N_e g})}) \frac{1}{1 + 4N_e r g} + \left( (1 - e^{-t(2r + \frac{1}{2N_e g})}) \frac{4N_e r g}{1 + 4N_e r g} - (1 - e^{-t(r + \frac{1}{2N_e g})}) \frac{4N_e r g}{1 + 2N_e r g} (1 - r_t) \right) f_{ii} \right. \\ &\quad \left. + (1 - e^{-t(r + \frac{1}{2N_e g})}) \frac{4N_e r g}{1 + 2N_e r g} (1 - r_t) f_{il} \right) \end{aligned} \quad (\text{A.23})$$

1086 There is additional coancestry between pairs of selected populations. This takes a different form than  
 1087 Equation 9 as there since if either lineage fails to recombine off the beneficial background during the sweep  
 1088 or standing phase, the lineage will be in population  $l$ . For selected populations  $i$  and  $j$ , now

$$\begin{aligned} f_{ij}^{(S)} &= (1 - y)^2 f_{ij} + y^2 \left( r_t^2 \left( \frac{1}{1 + 4N_e r g} + \frac{4N_e r g}{1 + 4N_e r g} f_{il} \right) + (1 - (1 - r_t))^2 f_{ij} + (1 - r_t)(1 - (1 - r_t))(f_{il} + f_{jl}) \right) \\ &\quad + y(1 - y) \left( 2(1 - (1 - r_t)) f_{ij} + (1 - r_t)(f_{il} + f_{jl}) \right) \end{aligned} \quad (\text{A.24})$$

1089 If either population is the source,  $l$  this reduces to

$$f_{il}^{(S)} = y(1 - r_t) \left( y(1 - r_t) \left( \frac{1}{1 + 4N_e r g} + \frac{4N_e r g}{1 + 4N_e r g} f_{il} \right) + (1 - y(1 - r_t)) f_{il} \right) + (1 - y(1 - r_t)) f_{il} \quad (\text{A.25})$$

1090 since if the lineage fails to recombine off the beneficial background in population  $i$ , it is back in population  $l$ .  
1091 If the lineage in  $l$  is still on the beneficial background after the sweep and the initial  $t$  generations of standing,  
1092 they can coalesce during the standing phase in population  $l$ . Else, the lineages will coalesce neutrally in  
1093 population  $l$ . However, if the lineage sampled in population  $i$  does not return to the source population (i.e.  
1094 it recombines during the sweep or standing phase of  $t$  generations), the lineages can coalesce with neutral  
1095 probability  $f_{il}$ .

1096 Lastly, we must incorporate the impact linked selection has on the coancestry between lineages sampled  
1097 from any pair of non-source selected population  $i$  and non-selected population  $k$ .

$$f_{ik}^{(S)} = y \left( (1 - r_t) f_{kl} + (1 - (1 - r_t)) f_{ik} \right) + (1 - y) f_{ik} \quad (\text{A.26})$$

1098 Since lineages that do not recombine off the beneficial background in population  $i$  go back into the source  
1099 population  $l$ , non-selected populations may now have more or less coancestry with population  $i$  depending  
1100 on whether  $l$  is neutrally has more or less coancestry with population  $l$ , respectively.

1101 It may be possible to extend these models to allow the source population to be an unsampled population,  
1102  $u$ . In this case, we need information about how our unsampled source is related to our sampled populations.  
1103 Specifically, we have  $f_{iu}$  and  $f_{uu}$  terms in the coancestry coefficients of any selected population  $i$  as well as  $f_{iu}$ ,  
1104  $f_{ju}$ , and  $f_{uu}$  for coancestry between any selected population pairs  $i$  and  $j$  and  $f_{kl}$  for unselected populations  
1105  $k$ . More work is needed to address this problem. It is possible to use all sampled populations, including  
1106 non-selected populations, as proxies for the unsampled source to give us information about which sampled  
1107 population our unsampled source is more closely related to. Additionally, if we assume the unsampled  
1108 population is distantly related to our sampled populations, such that they span the root, the coancestry  
1109 between  $u$  and any other sampled population will be 0.

## 1112 A.5 Migration model: more than two non-source selected populations

1113 In the main text, we consider two selected populations  $i$  and  $j$  where population  $i$  is the source of the  
1114 beneficial allele. We need to extend this model when we have more than two non-source selected populations.  
1115 Specifically, we need to define coancestry coefficients between selected non-source pairs. Now, let population  
1116  $l$  be a selected population and the source of the beneficial allele.

1117 The coancestry between non-source selected populations is affected by migration as there is some proba-  
1118 bility of either or both lineage failing to recombine off the beneficial background of the sweep and to migrate  
1119 back into population  $l$ . Thus, for selected populations  $i$  and  $j$ ,

$$f_{ij}^{(S)} = y^2 e^{-2r\delta} + y^2 (1 - e^{-2r\delta}) f_{il} + y(1 - y)(f_{il} + f_{jl}) + y(1 - ye^{-r\delta}) f_{ii} + (1 - y)^2 f_{ij} \quad (\text{A.27})$$

1120 If  $l$  is either population  $i$  or  $j$ , this reduces to Equation 13, up to a factor of  $2\delta$  as now only one  
1121 population experiences the delay,  $\delta$ , as the other is the source. Thus, Equation 13 is more accurate for  
1122 defining the coancestry coefficient between the source and selected populations. Equation 12 holds for the  
1123 coancestry within all non-source selected population and Equation 14 for all non-selected and non-source  
1124 selected population pairs. Lastly, again, we assume the source coancestry within the source population  $l$   
1125 follows that of an independent sweep from new mutation (Equation 4).

1126 Similar to the standing variant model with a source population above, we can think about extending this  
1127 migration model to allow the source population to be unsampled. More work is needed to address the same  
1128 issues related to estimating coancestry coefficients for unsampled populations.

## 1129 References

- 1130 Arendt, J. and D. Reznick (2008). Convergence and parallelism reconsidered: what have we learned about  
1131 the genetics of adaptation? *Trends in Ecology and Evolution* 23(1), 26 – 32.
- 1132 Aubury, L. E. (1902). *The copper resources of California (No. 23)*. Superintendent State Printing.

- 1133 Barrett, R. D. and D. Schluter (2008). Adaptation from standing genetic variation. *Trends in ecology &*  
1134 *evolution* 23(1), 38–44.
- 1135 Barton, N. (1998). The effect of hitch-hiking on neutral genealogies. *Genet. Res.* 72, 123–133.
- 1136 Barton, N. and B. O. Bengtsson (1986, Dec). The barrier to genetic exchange between hybridising popula-  
1137 tions. *Heredity* 57(3), 357–376.
- 1138 Berg, J. J. and G. Coop (2015). A coalescent model for a sweep of a unique standing variant. *Genetics* 201(2),  
1139 707–725.
- 1140 Bierne, N. (2010). The distinctive footprints of local hitchhiking in a varied environment and global hitch-  
1141 hiking in a subdivided population. *Evolution* 64(11), 3254–3272.
- 1142 Bierne, N., P.-A. Gagnaire, and P. David (2013). The geography of introgression in a patchy environment  
1143 and the thorn in the side of ecological speciation. *Current Zoology* 59(1), 72–86.
- 1144 Chan, Y. F., M. E. Marks, F. C. Jones, G. Villarreal, M. D. Shapiro, S. D. Brady, A. M. Southwick, D. M.  
1145 Absher, J. Grimwood, J. Schmutz, et al. (2010). Adaptive evolution of pelvic reduction in sticklebacks by  
1146 recurrent deletion of a *pitx1* enhancer. *science* 327(5963), 302–305.
- 1147 Charlesworth, B., M. Nordborg, and D. Charlesworth (1997, Oct). The effects of local selection, balanced  
1148 polymorphism and background selection on equilibrium patterns of genetic diversity in subdivided popu-  
1149 lations. *GenetRes* 70(2), 155–174.
- 1150 Chen, H., N. Patterson, and D. Reich (2010). Population differentiation as a test for selective sweeps.  
1151 *Genome research* 20(3), 393–402.
- 1152 Colosimo, P. F., K. E. Hosemann, S. Balabhadra, G. Villarreal, M. Dickson, J. Grimwood, J. Schmutz, R. M.  
1153 Myers, D. Schluter, and D. M. Kingsley (2005). Widespread parallel evolution in sticklebacks by repeated  
1154 fixation of ectodysplasin alleles. *science* 307(5717), 1928–1933.
- 1155 Coop, G., D. Witonsky, A. Di Rienzo, and J. K. Pritchard (2010). Using environmental correlations to  
1156 identify loci underlying local adaptation. *Genetics* 185(4), 1411–1423.
- 1157 DeGiorgio, M., K. E. Lohmueller, and R. Nielsen (2014). A model-based approach for identifying signatures  
1158 of ancient balancing selection in genetic data. *PLoS Genet* 10(8), e1004561.
- 1159 Durrett, R. and J. Schweinsberg (2004, 10). Approximating selective sweeps. 66, 129–38.
- 1160 Duvernell, D. D., J. B. Lindmeier, K. E. Faust, and A. Whitehead (2008). Relative influences of historical  
1161 and contemporary forces shaping the distribution of genetic variation in the atlantic killifish, *fundulus*  
1162 *heteroclitus*. *Molecular Ecology* 17(5), 1344–1360.
- 1163 Ewens, W. (2004). *Mathematical Population Genetics 1: Theoretical Introduction*. Interdisciplinary Applied  
1164 Mathematics. Springer New York.
- 1165 Gillespie, J. H. (2000). Genetic drift in an infinite population. The pseudohitchhiking model. *Genetics* 155,  
1166 909–919.
- 1167 Guerrero, R. F., F. Rousset, and M. Kirkpatrick (2012). Coalescent patterns for chromosomal inversions in  
1168 divergent populations. *Phil. Trans. R. Soc. B* 367(1587), 430–438.
- 1169 Harvey, P. H. and M. D. Pagel (1991). *The comparative method in evolutionary biology*, Volume 239. Oxford  
1170 university press Oxford.
- 1171 Hedrick, P. W. (2013). Adaptive introgression in animals: examples and comparison to new mutation and  
1172 standing variation as sources of adaptive variation. *Molecular ecology* 22(18), 4606–4618.
- 1173 Heliconius Genome Consortium (2012). Butterfly genome reveals promiscuous exchange of mimicry adapta-  
1174 tions among species. *Nature* 487(7405), 94–98.

- 1175 Hudson, R. R. (2001). Two-locus sampling distributions and their application. *Genetics* 159(4), 1805–1817.
- 1176 Hudson, R. R. (2002). Generating samples under a Wright–Fisher neutral model of genetic variation.  
1177 *Bioinformatics* 18, 337–338.
- 1178 Hudson, R. R. and N. L. Kaplan (1988). The coalescent process in models with selection and recombination.  
1179 *Genetics* 120(3), 831–840.
- 1180 Jones, F. C., M. G. Grabherr, Y. F. Chan, P. Russell, E. Mauceli, J. Johnson, R. Swofford, M. Pirun,  
1181 M. C. Zody, S. White, E. Birney, S. Searle, J. Schmutz, J. Grimwood, M. C. Dickson, R. M. Myers, C. T.  
1182 Miller, B. R. Summers, A. K. Knecht, S. D. Brady, H. Zhang, A. A. Pollen, T. Howes, C. Amemiya,  
1183 J. Baldwin, T. Bloom, D. B. Jaffe, R. Nicol, J. Wilkinson, E. S. Lander, F. Di Palma, K. Lindblad-Toh,  
1184 and D. M. Kingsley (2012, Apr). The genomic basis of adaptive evolution in threespine sticklebacks.  
1185 *Nature* 484(7392), 55–61.
- 1186 Kaplan, N., R. R. Hudson, and M. Iizuka (1991). The coalescent process in models with selection, recombina-  
1187 tion and geographic subdivision. *Genetical research* 57(01), 83–91.
- 1188 Kaplan, N. L., R. R. Hudson, and C. H. Langley (1989, December). The “hitchhiking effect” revisited.  
1189 *Genetics* 123, 887–899.
- 1190 Kelly, J. K. and M. J. Wade (2000). Molecular evolution near a two-locus balanced polymorphism. *Journal*  
1191 *of Theoretical Biology* 204(1), 83 – 101.
- 1192 Kim, Y. and T. Maruki (2011). Hitchhiking effect of a beneficial mutation spreading in a subdivided  
1193 population. *Genetics* 189(1), 213–226.
- 1194 Kim, Y. and R. Nielsen (2004). Linkage disequilibrium as a signature of selective sweeps. *Genetics* 167(3),  
1195 1513–1524.
- 1196 Kim, Y. and W. Stephan (2002). Detecting a local signature of genetic hitchhiking along a recombining  
1197 chromosome. *Genetics* 160, 765–777.
- 1198 Kirkpatrick, M. (2010). How and why chromosome inversions evolve. *PLoS Biol* 8(9), e1000501.
- 1199 Larribe, F. and P. Fearnhead (2011). On composite likelihoods in statistical genetics. *Statistica Sinica*,  
1200 43–69.
- 1201 Lee, Y. W. (2009). *Genetics Analysis of Standing Variation for Floral Morphology and Fitness Components*.  
1202 Ph. D. thesis, Duke University.
- 1203 Lipson, M., P.-R. Loh, A. Levin, D. Reich, N. Patterson, and B. Berger (2013, May). Efficient moment-based  
1204 inference of admixture parameters and sources of gene flow. *Mol Biol Evol* 30(8), 1788–1802.
- 1205 Losos, J. B. (2011). Convergence, adaptation, and constraint. *Evolution* 65(7), 1827–1840.
- 1206 MacNair, M. R., S. E. Smith, and Q. J. Cumbes (1993, 11). Heritability and distribution of variation in  
1207 degree of copper tolerance in *mimulus guttatus* at copperopolis, california. *Heredity* 71(5), 445–455.
- 1208 Martin, A. and V. Orgogozo (2013). The loci of repeated evolution: a catalog of genetic hotspots of  
1209 phenotypic variation. *Evolution* 67(5), 1235–1250.
- 1210 Maynard Smith, J. (1971). What use is sex? *Journal of Theoretical Biology* 30(2), 319 – 335.
- 1211 Maynard Smith, J. and J. Haigh (1974, February). The hitch-hiking effect of a favourable gene. *Genet*  
1212 *Res* 23(1), 23–35.
- 1213 Nacci, D., L. Coiro, D. Champlin, S. Jayaraman, R. McKinney, T. R. Gleason, W. R. Munns Jr., J. L.  
1214 Specker, and K. R. Cooper (1999). Adaptations of wild populations of the estuarine fish *fundulus hetero-*  
1215 *clitus* to persistent environmental contaminants. *Marine Biology* 134(1), 9–17.

- 1216 Nacci, D. E., D. Champlin, and S. Jayaraman (2010). Adaptation of the estuarine fish *fundulus heteroclitus*  
1217 (atlantic killifish) to polychlorinated biphenyls (pcbs). *Estuaries and Coasts* 33(4), 853–864.
- 1218 Nicholson, G., A. V. Smith, F. Jónsson, Ó. Gústafsson, K. Stefánsson, and P. Donnelly (2002). Assessing  
1219 population differentiation and isolation from single-nucleotide polymorphism data. *Journal of the Royal*  
1220 *Statistical Society: Series B (Statistical Methodology)* 64(4), 695–715.
- 1221 Nielsen, R., S. Williamson, Y. Kim, M. Hubisz, A. Clark, and C. Bustamante (2005). Genomic scans for  
1222 selective sweeps using SNP data. *Genome Res.* 15, 1566–1575.
- 1223 Orr, H. A. (2005, January). The probability of parallel evolution. *Evolution* 59(1), 216–220.
- 1224 Pearce, R. J., H. Pota, M.-S. B. Evehe, E.-H. Bâ, G. Mombo-Ngoma, A. L. Malisa, R. Ord, W. Inojosa,  
1225 A. Matondo, D. A. Diallo, W. Mbacham, I. V. van den Broek, T. D. Swarthout, A. Getachew, S. Dejene,  
1226 M. P. Grobusch, F. Njie, S. Dunyo, M. Kweku, S. Owusu-Agyei, D. Chandramohan, M. Bonnet, J.-P.  
1227 Guthmann, S. Clarke, K. I. Barnes, E. Streat, S. T. Katokele, P. Uusiku, C. O. Agboghoroma, O. Y.  
1228 Elegba, B. Cissé, I. E. A-Elbasit, H. A. Giha, S. P. Kachur, C. Lynch, J. B. Rwakimari, P. Chanda,  
1229 M. Hawela, B. Sharp, I. Naidoo, and C. Roper (2009, 04). Multiple origins and regional dispersal of  
1230 resistant *dhps* in African *Plasmodium falciparum* malaria. *PLoS Med* 6(4), e1000055.
- 1231 Pease, J. B., D. C. Haak, M. W. Hahn, and L. C. Moyle (2016). Phylogenomics reveals three sources of  
1232 adaptive variation during a rapid radiation. *PLoS Biol* 14(2), e1002379.
- 1233 Pennings, P. S. and J. Hermisson (2006, May). Soft sweeps ii—molecular population genetics of adaptation  
1234 from recurrent mutation or migration. *Mol Biol Evol* 23(5), 1076–1084.
- 1235 Przeworski, M., G. Coop, and J. D. Wall (2005). The signature of positive selection on standing genetic  
1236 variation. *Evolution* 59(11), 2312–2323.
- 1237 Racimo, F. (2016). Testing for ancient selection using cross-population allele frequency differentiation.  
1238 *Genetics* 202(2), 733–750.
- 1239 Racimo, F., S. Sankararaman, R. Nielsen, and E. Huerta-Sánchez (2015). Evidence for archaic adaptive  
1240 introgression in humans. *Nature Reviews Genetics* 16(6), 359–371.
- 1241 Reid, N. M., D. A. Proestou, B. W. Clark, W. C. Warren, J. K. Colbourne, J. R. Shaw, S. I. Karchner,  
1242 M. E. Hahn, D. Nacci, M. F. Oleksiak, D. L. Crawford, and A. Whitehead (2016). The genomic landscape  
1243 of rapid repeated evolutionary adaptation to toxic pollution in wild fish. *Science* 354(6317), 1305–1308.
- 1244 Roesti, M., S. Gavrillets, A. P. Hendry, W. Salzburger, and D. Berner (2014). The genomic signature of  
1245 parallel adaptation from shared genetic variation. *Molecular ecology* 23(16), 3944–3956.
- 1246 Rosenzweig, B. K., J. B. Pease, N. J. Besansky, and M. W. Hahn (2016). Powerful methods for detecting  
1247 introgressed regions from population genomic data. *Molecular Ecology* 25(11), 2387–2397.
- 1248 Samanta, S., Y.-J. Li, and B. S. Weir (2009). Drawing inferences about the coancestry coefficient. *Theoretical*  
1249 *Population Biology* 75(4), 312–9.
- 1250 Santiago, E. and A. Caballero (2005). Variation after a selective sweep in a subdivided population. *Genet-*  
1251 *ics* 169, 475–483.
- 1252 Schluter, D. and G. L. Conte (2009, Jun). Genetics and ecological speciation. *Proc Natl Acad Sci U S A* 106  
1253 *Suppl 1*, 9955–9962.
- 1254 Slatkin, M. and T. Wiehe (1998). Genetic hitch-hiking in a subdivided population. *Genetical research* 71(02),  
1255 155–160.
- 1256 Song, Y., S. Endepols, N. Klemann, D. Richter, F.-R. Matuschka, C.-H. Shih, M. W. Nachman, and M. H.  
1257 Kohn (2011). Adaptive introgression of anticoagulant rodent poison resistance by hybridization between  
1258 old world mice. *Current Biology* 21(15), 1296–1301.

- 1259 Stern, D. L. (2013, 11). The genetic causes of convergent evolution. *Nat Rev Genet* 14(11), 751–764.
- 1260 Thompson, E. A. (2013). Identity by descent: Variation in meiosis, across genomes, and in populations.  
1261 *Genetics* 194(2), 301–326.
- 1262 Tishkoff, S. A., F. A. Reed, A. Ranciaro, B. F. Voight, C. C. Babbitt, J. S. Silverman, K. Powell, H. M.  
1263 Mortensen, J. B. Hirbo, M. Osman, M. Ibrahim, S. A. Omar, G. Lema, T. B. Nyambo, J. Ghorri, S. Bump-  
1264 stead, J. K. Pritchard, G. A. Wray, and P. Deloukas (2007, Jan). Convergent adaptation of human lactase  
1265 persistence in Africa and Europe. *Nat Genet* 39(1), 31–40.
- 1266 Turner, T., E. Bourne, E. V. Wettberg, T. Hu, and S. Nuzhdin (2010, January). Population resequencing  
1267 reveals local adaptation of *Arabidopsis lyrata* to serpentine soils. *Nat. Genet.* 42(3), 260–3.
- 1268 Varin, C., N. Reid, and D. Firth (2011). An overview of composite likelihood methods. *Statistica Sinica*,  
1269 5–42.
- 1270 Weir, B. S. and W. G. Hill (2002). Estimating F-statistics. *Annual Review of Genetics* 36, 721–50.
- 1271 Welch, J. J. and C. D. Jiggins (2014). Standing and flowing: the complex origins of adaptive variation.  
1272 *Molecular Ecology* 23(16), 3935–3937.
- 1273 Wiuf, C. (2006). Consistency of estimators of population scaled parameters using composite likelihood.  
1274 *Journal of mathematical biology* 53(5), 821–841.
- 1275 Wood, T. E., J. M. Burke, and L. H. Rieseberg (2005, 02). Parallel genotypic adaptation: when evolution  
1276 repeats itself. *Genetica* 123(1-2), 157–170.
- 1277 Wright, K. M., U. Hellsten, C. Xu, A. L. Jeong, A. Sreedasyam, J. A. Chapman, J. Schmutz, G. Coop, D. S.  
1278 Rokhsar, and J. H. Willis (2015). Adaptation to heavy-metal contaminated environments proceeds via  
1279 selection on pre-existing genetic variation. *bioRxiv*.
- 1280 Wright, S. (1943). Isolation by distance. *Genetics* 28(2), 114.
- 1281 Wright, S. (1951, March). The genetical structure of populations. *Annals of Eugenics* 15(4), 323–354.

## 1282 S1 Single pulse of migration models

1283 We also considered models of a single pulse of migration. We solve for  $f_{ii}^{(S)}$  and  $f_{ij}^{(S)}$  for the bounds on  
1284 the time during which the beneficial allele could migrate: (1) “instantly” after the beneficial allele arises in  
1285 population  $i$  and (2) after the beneficial allele reaches fixation in the population  $i$ .

### 1286 S1.1 Beneficial allele migrates instantly after it arises in population $i$ .

1287 In this case, we are specifying the pulse of migration from population  $i$  into population  $j$  occurs sufficiently  
1288 soon enough after the sweep began such that the entire haplotype the beneficial mutation arises on in  
1289 population  $i$  migrates to population  $j$  (i.e. there is no time for recombination to occur). This case gives us  
1290 results for an extreme of a single pulse of migration may not be particularly relevant as the spread of the  
1291 beneficial allele into population  $j$  will likely only occur after it has reached a sufficiently high frequency in  
1292 population  $i$  as it may be lost due to drift. However, these results aid in our intuition of this model.

1293 As the beneficial allele originates in population  $i$ , again,

$$f_{ii}^{(S)} = (f_{ii} + y^2(1 - f_{ii})). \quad (\text{A.1})$$

1294 The probability of two lineages in the recipient population,  $j$ , coalescing before reaching the ancestral  
1295 population is now

$$f_{jj}^{(S)} = y^2 + 2y(1 - y)f_{ij} + (1 - y)^2 f_{jj} \quad (\text{A.2})$$

1296 Here, both lineages can fail to recombine off the sweep (w.p.  $y^2$ ) and therefore coalesce with probability 1.  
1297 Exactly one lineage can recombine off the sweep (w.p.  $2y(1 - y)$ ) and therefore the two lineages can only  
1298 coalesce in the shared drift phase (w.p.  $f_{ij}$ ) as the lineage that does not recombine off the sweep migrates  
1299 into population  $i$ . Both lineages can recombine off the sweep (w.p.  $(1 - y)^2$ ) and then can coalesce in  
1300 population  $j$  before they reach the ancestral population.

1301 The probability of two lineages drawn from each population coalescing before reaching the ancestral  
1302 population is

$$f_{ij}^{(S)} = (1 - y)f_{ij} + y(y + (1 - y)f_{ii}) \quad (\text{A.3})$$

1304 In this case, if the lineage in population  $j$  recombines off the sweep (w.p.  $1 - y$ ), the two lineages can  
1305 only coalesce in the shared drift phase (w.p.  $f_{ij}$ ) before reaching the ancestral population. If the lineage in  
1306 population  $j$  fails to recombine off the sweep (w.p.  $y$ ), it migrates back to population  $i$  and will be forced  
1307 to coalesce with the lineage in population  $i$  if it also failed to recombine, else they will coalesce neutrally in  
1308 population  $i$ .

### 1309 S1.2 Beneficial allele migrates after it reaches fixation in population $i$ .

1310 For the coancestry coefficient for population  $j$ , the logic follows from that of when the pulse of migration  
1311 happens instantly. However in deriving the coancestry coefficient between populations  $i$  and  $j$ , in the case  
1312 where the lineage sampled from population  $j$  fails to recombine off the sweep and migrates back to population  
1313  $i$ , which happens with probability  $y$ , it is like we have two lineages sampled in population  $i$ . Now, both could  
1314 either fail to recombine off the sweep and coalesce with probability 1 or one or both could recombine off the  
1315 sweep and coalesce neutrally in population  $i$ . This can be written as

$$f_{ij}^{(S)} = (1 - y)f_{ij} + y(y^2 + (1 - y^2)f_{ii}) \quad (\text{A.4})$$

1316 Together, these results characterize the other end point of a single pulse of migration spreading the  
1317 beneficial allele to the recipient population.



## 1318 S2 Forward in time derivation examples

1319 For the forward in time results we utilize Gillespie's (2000) pseudohitchhiking approximation with the incor-  
 1320 poration of recombination to model the variance in the change in neutral allele frequencies due to a selective  
 1321 sweep ( $\Delta_S x_i$  for population  $i$ ). A new beneficial mutation will arise on the same background as a neutral  
 1322 allele with probability equal to its frequency in the population,  $x$ . In the case no crossing over occurs and  
 1323 the new mutation sweeps to fixation, the neutral allele frequency after the hitchhiking event,  $x'$ , will either  
 1324 be 1 with probability  $x$  or 0 with probability  $1 - x$ . Therefore,

$$\Delta_S x = \begin{cases} (1 - x) & \text{with probability } x \\ -x & \text{with probability } (1 - x) \end{cases} \quad (\text{B.5})$$

1325 thus  $\mathbb{E}[\Delta_S x] = 0$  and  $\text{Var}[\Delta_S x] = x(1 - x)$ .

1326 Recombination can be incorporated into this model, allowing the neutral allele to stop hitchhiking before  
 1327 it reaches fixation. The frequency of the haplotype on which the favorable mutation arises will increase to  
 1328  $y$  and all other alleles will have their frequencies reduced by  $1 - y$ . So, if the favorable allele appears on  
 1329 the same background of our neutral allele, which happens with probability  $x$ ,  $x' = (1 - y)x + y$ . Else, with  
 1330 probability  $1 - x$ ,  $x' = (1 - y)x$ . Therefore,

$$\Delta_S x = \begin{cases} y(1 - x) & \text{with probability } x \\ -yx & \text{with probability } (1 - x) \end{cases} \quad (\text{B.6})$$

1332 thus with recombination,  $\mathbb{E}[\Delta_S x] = 0$  and  $\text{Var}[\Delta_S x] = y^2 x(1 - x)$ .

1333 We can break down the changes in allele frequencies in the two populations from the ancestral allele  
 1334 frequency  $\epsilon$  into three components if we assume the independent drift in each population after the sweep  
 1335 is negligible: the change due to (1) shared drift between populations  $i$  and  $j$  before they split ( $\Delta_N x_{ij}$ ),  
 1336 (2) independent drift in each population before the sweep ( $\Delta_N x_i$  and  $\Delta_N x_j$ ), and (3) the selective sweep  
 1337 occurring in each population ( $\Delta_S x_i$  and  $\Delta_S x_j$ ).

1338 Define  $\mathbb{E}[\Delta_N x_{ij}^2] = \epsilon(1 - \epsilon)f_{ij}$  and  $\mathbb{E}[\Delta_N x_i^2] = \epsilon(1 - \epsilon)f_i$  for population  $i$ . The total amount of vari-  
 1339 ance in a neutral allele frequency for the  $i$ th population is defined as  $\epsilon(1 - \epsilon)f_{ii}$  which we approximate as  
 1340  $\epsilon(1 - \epsilon)(f_{ij} + f_i)$ . This only holds if we assume the time intervals are short relative to drift so that these  
 1341 terms act additively. If this is not the case, the  $\mathbb{E}[\Delta_N x_i^2]$  is no longer the probability that two alleles drawn  
 1342 from population  $i$  before the sweep begins are identical by descent with reference to the ancestral population  
 1343 with neutral allele frequency  $\epsilon$ , but rather with reference to the population before the split into populations  
 1344  $i$  and  $j$  with neutral allele frequency  $x_{ij}$ . A more careful treatment of these parameters could be done to  
 1345 relax this assumption, and follows naturally in a coalescent setting.

1346 From a forward in time perspective, we can solve for  $\text{Var}[\Delta x_i]$ ,  $\text{Var}[\Delta x_j]$ , and  $\text{Cov}[\Delta x_i, \Delta x_j]$  with  $\Delta x_i =$   
 1347  $\Delta_N x_{ij} + \Delta_N x_i + \Delta_S x_i$ . Assuming drift terms are independent of each other, we are left with the following  
 1348 expressions

$$\text{Var}[\Delta x_i] = \epsilon(1 - \epsilon)f_{ii} + \mathbb{E}[\Delta_S x_i^2] + 2\mathbb{E}[\Delta_N x_{ij} \cdot \Delta_S x_i] + 2\mathbb{E}[\Delta_N x_i \cdot \Delta_S x_i] \quad (\text{B.7})$$

1351 and

$$\begin{aligned} \text{Cov}[\Delta x_i, \Delta x_j] = & \epsilon(1 - \epsilon)f_{ij} + \mathbb{E}[\Delta_N x_{ij} \cdot \Delta_S x_i] + \mathbb{E}[\Delta_N x_{ij} \cdot \Delta_S x_j] + \mathbb{E}[\Delta_N x_i \cdot \Delta_S x_j] \\ & + \mathbb{E}[\Delta_N x_j \cdot \Delta_S x_i] + \mathbb{E}[\Delta_S x_i \cdot \Delta_S x_j] \end{aligned} \quad (\text{B.8})$$

### 1352 S2.1 Independent sweep model

In the case of independent sweeps where there is no gene flow between populations, many terms in Equations  
 B.7 and B.8 equal zero since the sweeps are independent. For the variances, we are left with

$$\begin{aligned} \text{Var}[\Delta x_i] = & \epsilon(1 - \epsilon)f_{ii} + \mathbb{E}[\Delta_S x_i^2] \\ = & \epsilon(1 - \epsilon)(f_{ii} + y^2(1 - f_{ii})) \end{aligned} \quad (\text{B.9})$$

1353 The covariance in allele frequencies between populations  $i$  and  $j$ , is simply what we would expect under  
1354 neutrality.

$$\text{Cov}[\Delta x_1, \Delta x_2] = \epsilon(1 - \epsilon)f_{ij} \quad (\text{B.10})$$

## 1355 S2.2 Shared sweeps via migration

1356 The migration models better exemplifies these forward in time calculations. We demonstrate the calculations  
1357 of  $\text{Var}[\Delta x_j]$  and  $\text{Cov}[\Delta x_i, \Delta x_j]$  for pulse of migration models specified in Supplement S1.

### 1358 S2.2.1 Beneficial allele migrates instantly after it arises in population $i$ .

1359 The background on which the beneficial mutation arises depends on the neutral allele frequency in popula-  
1360 tion  $i$  before the sweep,  $x_i$ . We are specifying the pulse of migration from population  $i$  into population  $j$   
1361 occurs sufficiently soon enough after the sweep began such that the entire haplotype the beneficial mutation  
1362 arises on in population  $i$  migrates to population  $j$  (i.e. there is no time for recombination to occur). Now  
1363  $\Delta_S x_j$  depends on the neutral allele frequency in population  $i$  before the sweep.

$$\Delta_S x_j = \begin{cases} y(1 - (\epsilon + \Delta_N x_{ij} + \Delta_N x_j)) & \text{with probability } \epsilon + \Delta_N x_{ij} + \Delta_N x_i \\ -y(\epsilon + \Delta_N x_{ij} + \Delta_N x_j) & \text{with probability } (1 - (\epsilon + \Delta_N x_{ij} + \Delta_N x_i)) \end{cases} \quad (\text{B.11})$$

1365

1366

1367 As the beneficial allele originates in population  $i$ , again,

$$\text{Var}[\Delta x_i] = \epsilon(1 - \epsilon)(f_{ii} + y^2(1 - f_{ii})). \quad (\text{B.12})$$

1368

1369

Now  $\Delta_S x_j$  depends on  $x_i$ ,  $\mathbb{E}[\Delta_N x_i \cdot \Delta_S x_j]$ ,  $\mathbb{E}[\Delta_S x_i \cdot \Delta_S x_j]$ , and  $\mathbb{E}[\Delta_N x_{ij} \cdot \Delta_S x_j]$  are no longer zero. So,

$$\begin{aligned} \text{Var}[\Delta x_j] &= \epsilon(1 - \epsilon)f_{jj} + 2\mathbb{E}[\Delta_N x_{ij} \cdot \Delta_S x_j] + \mathbb{E}[\Delta_S x_i^2] \\ &= \epsilon(1 - \epsilon)(f_{jj} - 2yf_j + y^2(1 + f_j - f_{ij})) \end{aligned} \quad (\text{B.13})$$

and

$$\begin{aligned} \text{Cov}[\Delta x_i, \Delta x_j] &= \epsilon(1 - \epsilon)f_{ij} + \mathbb{E}[\Delta_N x_i \cdot \Delta_S x_i] + \mathbb{E}[\Delta_S x_i \cdot \Delta_S x_j] \\ &= \epsilon(1 - \epsilon)(f_{ij} + yf_i + y^2(1 - f_i - f_{ij})). \end{aligned} \quad (\text{B.14})$$

1370

1371

This result is the same as Equation A.3 if the assumption about drift being additive holds such that  $f_{ii} = f_i + f_{ij}$ .

### 1372 S2.2.2 Beneficial allele migrates after it reaches fixation in population $i$ .

1373 Now, the frequency of a neutral allele in population  $i$  after the sweep has occurred is

$$x_i' = \begin{cases} y + (1 - y)x_i & \text{with probability } x_i \\ (1 - y)x_i & \text{with probability } (1 - x_i) \end{cases}$$

1374

Fixing that the migration from population  $i$  into  $j$  occurs after the sweep has finished in population  $i$ ,

$$\Delta_S x_j = \begin{cases} y(1 - (\epsilon + \Delta_N x_{ij} + \Delta_N x_j)) & \text{with probability } \epsilon + \Delta_N x_{ij} + \Delta_N x_i + \Delta_S x_i \\ -y(\epsilon + \Delta_N x_{ij} + \Delta_N x_j) & \text{with probability } (1 - (\epsilon + \Delta_N x_{ij} + \Delta_N x_i - \Delta_S x_i)) \end{cases} \quad (\text{B.15})$$

1375

This can also be written as

$$\Delta_S x_j = \begin{cases} y(1 - x_j) & \text{with probability } x_i(y + (1 - y)x_i) \\ y(1 - x_j) & \text{with probability } (1 - x_i)(1 - y)x_i \\ -yx_j & \text{with probability } x_i(1 - y - (1 - y)x_i) \\ -yx_j & \text{with probability } (1 - x_i)(1 - (1 - y)x_i) \end{cases} \quad (\text{B.16})$$

1376 Here, the first case is that the beneficial allele arises on the same background as our neutral allele in  
 1377 population  $i$  and then is the haplotype that migrates into population  $j$ . The probability of the haplotype  
 1378 migrating is equal to its frequency in the population. The third case also includes the beneficial allele arising  
 1379 on the same background as our neutral allele, but the other haplotype migrates. The second and fourth cases  
 1380 are when the beneficial mutation arises on the other background as our neutral allele. In the second case,  
 1381 the haplotype containing our neutral allele migrates after the sweep and in the fourth, the other haplotype  
 1382 migrates.

1383  
 1384 The variance within population  $i$  and population  $j$  are the same as in the case of the beneficial allele  
 1385 migrating instantly. The only term changed by specifying that the pulse of migration happens after the  
 1386 sweep is  $\mathbb{E}[\Delta_S x_i \cdot \Delta_S x_j]$  which is now  $\epsilon(1-\epsilon)y^3(1-f_{jj})$ . So,

$$\text{Cov}[\Delta x_i, \Delta x_j] = \epsilon(1-\epsilon)(f_{ij} + yf_j + y^3(1-f_j - f_{ij})) \quad (\text{B.17})$$

### 1387 S3 mssel input for simulations

1388 **Independent sweep model.** mssel input for all independent sweep model is of the following form with  
 1389 different trajectory files for each  $s$ ,

```
./mssel 40 1000 20 20 ind_sel0.1_stochastic.traj 0 -t 2000 -r 2000 10000
-I 4 10 0 0 10 0 10 10 0 -ej 0.05 3 4 -ej 0.05 2 1 -ej 0.07 4 1
```

1390 **Standing variation model.**

```
./mssel 40 1000 20 20 sv_sel0.01_g0.001_t50_stochastic.traj 0 -t 200 -r 120 10000
-I 4 10 0 0 10 0 10 10 0 -ej 0.0346 2 1 -ej 0.0346 3 4 -ej 0.03575 4 1
./mssel 40 100 20 20 sv_sel0.01_g0.001_t250_stochastic.traj 0 -t 200 -r 200 10000
-I 4 10 0 0 10 0 10 10 0 -ej 0.039 3 4 -ej 0.039 2 1 -ej 0.0408 4 1
./mssel 40 1000 20 20 sv_sel0.01_g0.001_t500_stochastic.traj 0 -t 200 -r 200 10000
-I 4 10 0 0 10 0 10 10 0 -ej 0.04 2 1 -ej 0.04 3 4 -ej 0.047 4 1
./mssel 40 100 20 20 sv_sel0.01_g0.001_t1000_stochastic.traj 0 -t 200 -r 200 10000
-I 4 10 0 0 10 0 10 10 0 -ej 0.04 3 4 -ej 0.04 2 1 -ej 0.0595 4 1
./mssel 40 1000 20 20 sv_sel0.01_g0.001_t5000_stochastic.traj 0 -t 200 -r 200 10000
-I 4 10 0 0 10 0 10 10 0 -ej 0.135 2 1 -ej 0.135 3 4 -ej 0.1595 4 1
```

1391 We also simulated under two additional selection coefficients,  $s = [0.001, 0.05]$ , keeping  $t = 500$  and  
 1392  $g = 0.001$ .

```
./mssel 40 100 20 20 sv_sel0.001_g0.001_t500_stochastic.traj 0 -t 200 -r 200 10000
-I 4 10 0 0 10 0 10 10 0 -ej 0.3455 3 4 -ej 0.3455 2 1 -ej 0.3578 4 1
./mssel 40 100 20 20 sv_sel0.05_g0.001_t500_Ne10000_stochastic.traj 0 -t 200 -r 200 10000
-I 4 10 0 0 10 0 10 10 0 -ej 0.00695 3 4 -ej 0.00695 2 1 -ej 0.01935 4 1
```

1393 **Migration model.**

```
./mssel 40 1000 20 20 mig_sel0.01_mig1e-04_stochastic.traj 0 -t 200 -r 200 10000
-I 4 10 0 0 10 0 10 10 0 -ej 0.07 2 1 -ej 0.07 3 4 -ej 0.1 4 1
-em 0.059 3 2 0 -em 0 3 2 4
./mssel 40 1000 20 20 mig_sel0.01_mig0.001_stochastic.traj 0 -t 200 -r 200 10000
-I 4 10 0 0 10 0 10 10 0 -ej 0.07 2 1 -ej 0.07 3 4 -ej 0.1 4 1
-em 0.059 3 2 0 -em 0 3 2 40
./mssel 40 1000 20 20 mig_sel0.01_mig0.01_stochastic.traj 0 -t 200 -r 200 10000
-I 4 10 0 0 10 0 10 10 0 -ej 0.07 2 1 -ej 0.07 3 4 -ej 0.1 4 1
-em 0.059 3 2 0 -em 0 3 2 400
./mssel 40 1000 20 20 mig_sel0.01_mig0.1_stochastic.traj 0 -t 200 -r 200 10000
-I 4 10 0 0 10 0 10 10 0 -ej 0.07 2 1 -ej 0.07 3 4 -ej 0.1 4 1
-em 0.059 3 2 0 -em 0 3 2 4000
```

1394 We also simulated under two additional selection coefficients,  $s = [0.005, 0.05]$ , keeping  $m = 0.001$ .

```
./mssel 40 100 20 20 mig_sel0.05_mig0.001_stochastic.traj 0 -t 200 -r 200 10000
-I 4 10 0 0 10 0 10 10 0 -ej 0.021 2 1 -ej 0.021 3 4 -ej 0.03 4 1
-em 0.014 3 2 0 -em 0 3 2 40
./mssel 40 100 20 20 mig_sel0.005_mig0.001_stochastic.traj 0 -t 200 -r 200 10000
-I 4 10 0 0 10 0 10 10 0 -ej 0.12 2 1 -ej 0.12 3 4 -ej 0.17 4 1
-em 0.11 3 2 0 -em 0 3 2 40
```

1395

## 1396 S4 Parametric-bootstrap simulation details

### 1397 S4.1 Copper tolerance in *Mimulus guttatus* specifics

1398 Below are the input for the simulation runs to generate parametric bootstraps for the *Mimulus guttatus*  
1399 analysis. We simulate with  $N_e = 7500$ , except for in the migration model where  $N_e = 30000$  (to allow for  
1400 smaller  $\hat{s}$ ).

#### 1401 Neutral model.

```
./ms 194 100 -s 5723 -r 239.7203 169294 -I 4 62 42 40 50 -ej 0.057 4 1 -ej 0.056 2 1
-ej 0.085 3 1
```

#### 1402 Independent mutations model. ( $\hat{\ell} = 302666$ , $\hat{s} = 0.021$ )

```
./mssel 194 100 102 92 mim_indMLE_comp.traj 87565.86 -s 5723 -r 239.7203 169294
-I 4 0 62 42 0 0 40 50 0 -ej 0.057 4 1 -ej 0.056 2 1 -ej 0.085 3 1
```

#### 1403 Migration model. ( $\hat{\ell} = 308504$ , $\hat{s} = 0.003$ , $\hat{m} = 1$ , source pop = 1)

```
./mssel 194 100 102 92 mim_migMLE_comp_Ne30000.traj 93403.6 -s 5723 -r 958.8812 169294
-I 4 0 62 42 0 0 40 50 0 -ej 0.057 4 1 -ej 0.056 2 1 -ej 0.085 3 1
-em 0.04975 3 1 0 -em 0.0496 3 1 120000
```

#### 1404 Standing variant with source model. ( $\hat{\ell} = 308504$ , $\hat{s} = 0.034$ , $\hat{g} = 10^{-7}$ , $\hat{t} = 646$ , source pop = 1)

```
./mssel 194 100 102 92 mim_svSourceMLE_comp.traj 93403.6 -s 5723 -r 239.7203 169294
-I 4 0 62 42 0 0 40 50 0 -ej 0.057 4 1 -ej 0.056 2 1 -ej 0.085 3 1
-em 0.043 3 1 0.001 -em 0.045 3 1 0
```

1405

### 1406 S4.2 Industrial pollutant tolerance in *Fundulus heteroclitus* specifics

1407 Below are the input for the simulation runs to generate parametric bootstraps for the *Fundulus heteroclitus*  
1408 analysis. We simulate with  $N_e = 1000$  for all models.

#### 1409 Neutral model.

```
./ms 768 100 -s 66593 -r 214.4814 2470984 -I 8 96 96 98 100 100 86 94 98
-ej 0.0274276738490838 4 3 -ej 0.0344793500868448 3 1 -ej 0.0473737546397982 2 1
-ej 0.0529009970762367 6 1 -ej 0.060223521932099 5 1 -ej 0.0281723542369385 8 7
-ej 0.131042855088188 7 1
```

1410 **Independent mutations model.** ( $\hat{\ell} = 1790785$ ,  $\hat{s} = 0.2$ )

```
./mssel 768 100 380 388 indMLE_killi_Ne1000.traj 1789333 -s 66593 -r 214.4814 2470984
-I 8 96 0 0 96 98 0 0 100 100 0 0 86 94 0 0 98 -ej 0.0274276738490838 4 3
-ej 0.0344793500868448 3 1 -ej 0.0473737546397982 2 1 -ej 0.0529009970762367 6 1
-ej 0.060223521932099 5 1 -ej 0.0281723542369385 8 7 -ej 0.131042855088188 7 1
```

1411 **Migration model.** ( $\hat{\ell} = 2472436$ ,  $\hat{s} = 0.6$ ,  $\hat{m} = 1$ , source pop = 6 (T3))

```
./mssel 768 100 380 388 mig_mle_Ne1000_killi.traj 2470984 -s 66593 -r 214.4814 2470984
-I 8 96 0 0 96 98 0 0 100 100 0 0 86 94 0 0 98 -ej 0.0274276738490838 4 3
-ej 0.0344793500868448 3 1 -ej 0.0473737546397982 2 1 -ej 0.0529009970762367 6 1
-ej 0.060223521932099 5 1 -ej 0.0281723542369385 8 7 -ej 0.131042855088188 7 1
-em 0.00614 8 6 0 -em 0.006 8 6 4000 -em 0.00614 2 6 0 -em 0.006 2 6 4000
-em 0.00614 4 6 0 -em 0.006 4 6 4000
```

1412 **Standing variant with source model.** ( $\hat{\ell} = 2472436$ ,  $\hat{s} = 0.6$ ,  $\hat{g} = 10^{-9}$ ,  $\hat{t} = 50$ , source pop = 4 (T2))

```
./mssel 768 100 380 388 sv_killiMLE_Ne1000.traj 2470984 -s 66593 -r 214.4814 2470984
-I 8 96 0 0 96 98 0 0 100 100 0 0 86 94 0 0 98 -ej 0.0274276738490838 4 3
-ej 0.0344793500868448 3 1 -ej 0.0473737546397982 2 1 -ej 0.0529009970762367 6 1
-ej 0.060223521932099 5 1 -ej 0.0281723542369385 8 7 -ej 0.131042855088188 7 1
-em 0.0243 8 4 0 -em 0.0240 8 4 0.0001 -em 0.0243 2 4 0 -em 0.0240 2 4 0.0001
-em 0.0243 6 4 0 -em 0.0240 6 4 0.0001
```

1413 **Migration in North and independent mutation in South model.** ( $\hat{\ell} = 2472436$ ,  $\hat{s} = 0.4$ ,  $\hat{m} = 10^{-5}$ ,  
1414 source pop = 6 (T3))

```
./mssel 768 100 380 388 migInd_mle_killi_Ne1000.traj 2470984 -s 66593 -r 214.4814 2470984
-I 8 96 0 0 96 98 0 0 100 100 0 0 86 94 0 0 98 -ej 0.0274276738490838 4 3
-ej 0.0344793500868448 3 1 -ej 0.0473737546397982 2 1 -ej 0.0529009970762367 6 1
-ej 0.060223521932099 5 1 -ej 0.0281723542369385 8 7 -ej 0.131042855088188 7 1
-em 0.01237 2 6 0 -em 0.0089 2 6 0.04 -em 0.01237 4 6 0 -em 0.0089 4 6 0.04
```

1415 **Standing variation with source in North and independent mutation in South model.** ( $\hat{\ell} =$   
1416  $1961198$ ,  $\hat{s} = 0.3$ ,  $\hat{g} = 10^{-6}$ ,  $\hat{t} = 8$ , source pop = 6 (T3))

```
./mssel 768 100 380 388 svInd_killi_Ne1000.traj 1959746 -s 66593 -r 214.4814 2470984
-I 8 96 0 0 96 98 0 0 100 100 0 0 86 94 0 0 98 -ej 0.0274276738490838 4 3
-ej 0.0344793500868448 3 1 -ej 0.0473737546397982 2 1 -ej 0.0529009970762367 6 1
-ej 0.060223521932099 5 1 -ej 0.0281723542369385 8 7 -ej 0.131042855088188 7 1
-em 0.0195 2 6 0 -em 0.01925 2 6 0.0001 -em 0.0195 4 6 0 -em 0.01925 4 6 0.0001
```

1417 **S5 Supplemental tables and figures**

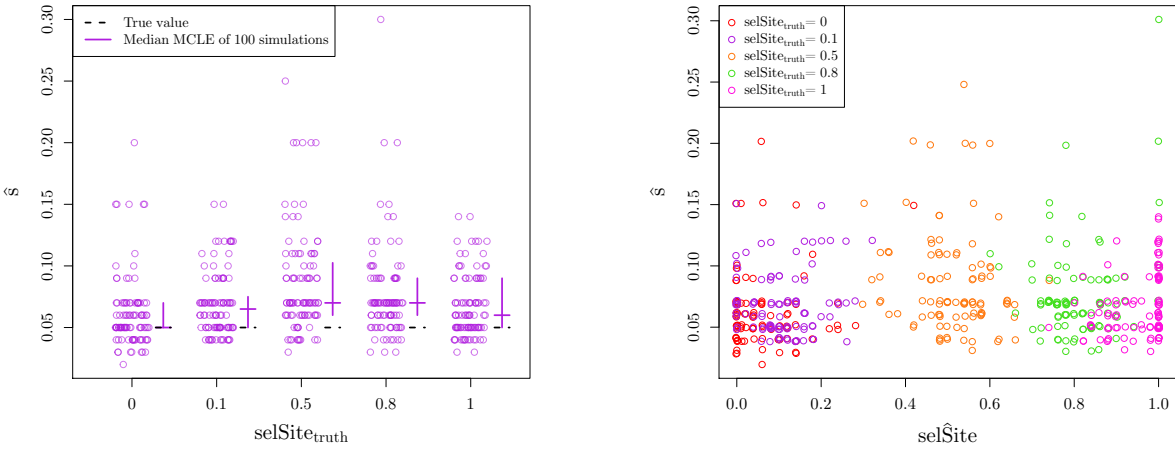

(a) MCLE of **selection coefficients** as function of true location of selected site. Each location of selected site has 100 simulations under **independent mutation model** (10 chromosomes per population,  $N_e = 100,000$ ,  $s = 0.05$ ). Crossbars indicate first and third quartiles with second quartiles (medians) as the horizontal line. The true values of the parameters are marked with dashed, black lines.

(b) MCLE of **selection coefficients** versus MCLE of **location of selected site**. True location of selected site is marked by color. Each location of selected site has 100 simulations under **independent mutation model** (10 chromosomes per population,  $N_e = 100,000$ ,  $s = 0.05$ )

Figure S1: MCLE of **parameters for independent mutation simulations allowing selected site to vary**.

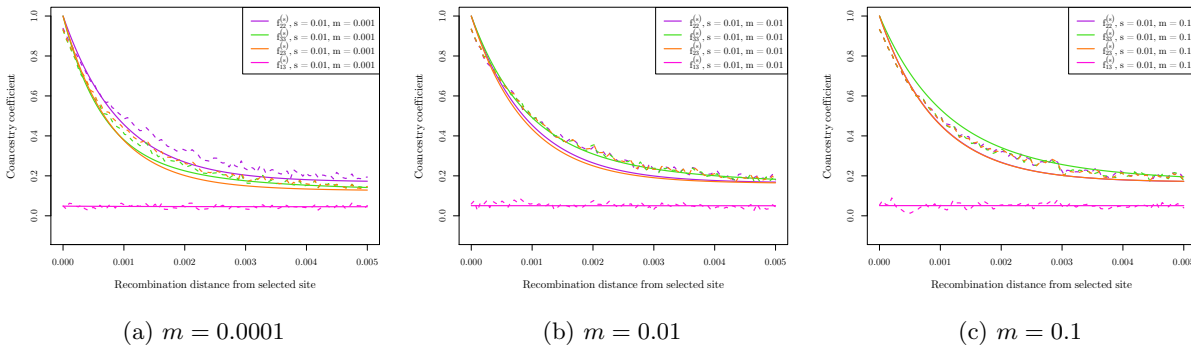

Figure S2: Average coancestry coefficient values for migration simulations with various  $m$ , across 100 runs of simulations for each of 100 bins of distance away from the selected site, showing the migration rate parameter does not have a large effect on both expectations (solid lines) and simulation results (dashed lines). For all simulations,  $s = 0.01$ ,  $N_e = 10,000$ , and the source of the beneficial allele is population 2.

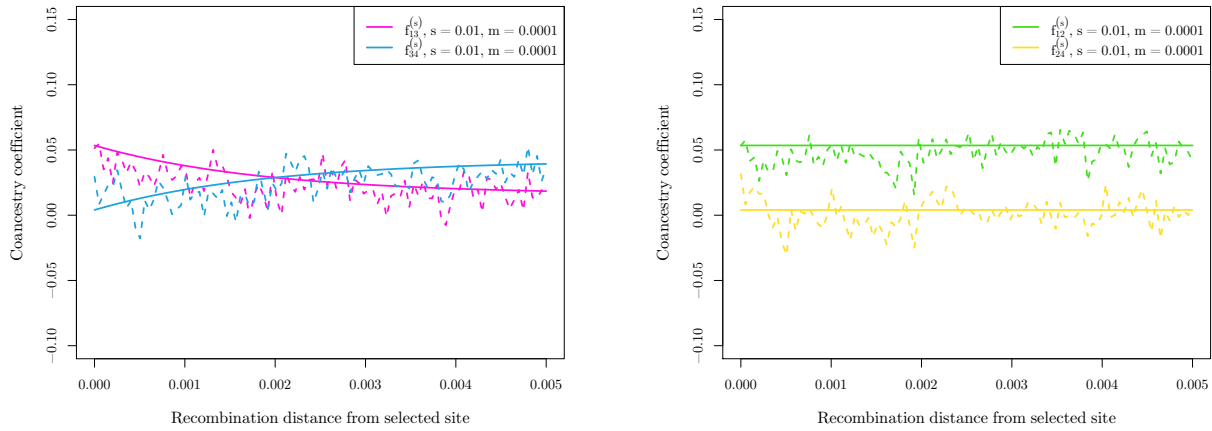

(a) Average coancestry coefficient values for migration simulations across 100 runs of simulations for each of 100 bins of distance away from the selected site, between recipient population (3) and non-selected populations (1 and 4).

(b) Average coancestry coefficient values for migration simulations across 100 runs of simulations for each of 100 bins of distance away from the selected site, between source population (2) and non-selected populations (1 and 4).

Figure S3: Average coancestry coefficient values for migration simulations across 100 runs of simulations for each of 100 bins of distance away from the selected site, between source and recipient populations and non-selected populations ( $s = 0.01$ ,  $m = 0.001$ ,  $N_e = 10,000$ ).

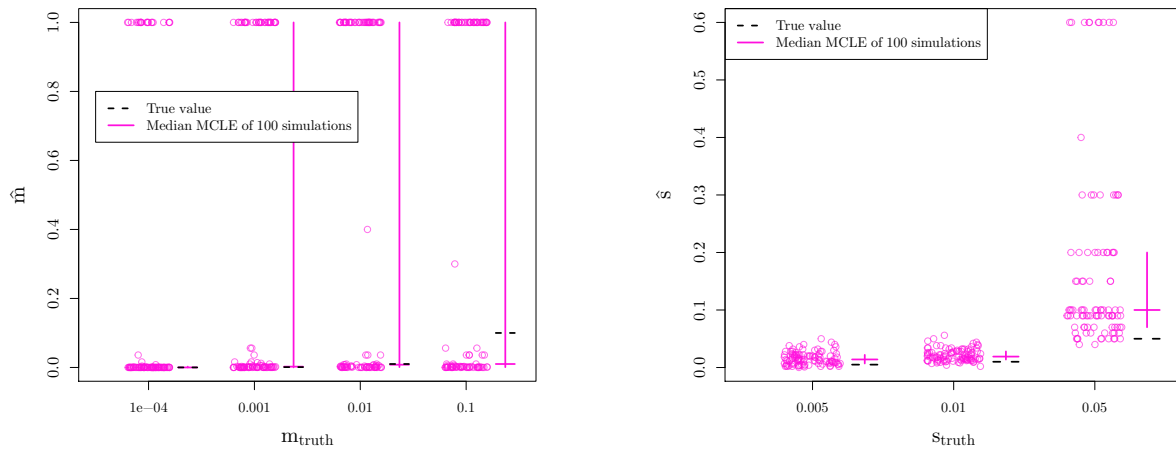

(a) MCLE of **migration rates** for 100 simulations under **migration model** (10 chromosomes per population,  $N_e = 10,000$ ,  $s = 0.01$ )

(b) MCLE of **selection coefficients** for 100 simulations under **migration model** (10 chromosomes per population,  $N_e = 10,000$ ,  $m = 0.001$ )

Figure S4: MCLE of **parameters** for **migration model** simulations. We vary the true value of the parameter used for simulations along the x-axis and show the MCLE for each of 100 simulations (points). Crossbars indicate first and third quartiles with second quartiles (medians) as the horizontal line. The true values of the parameters are marked with dashed, black lines.

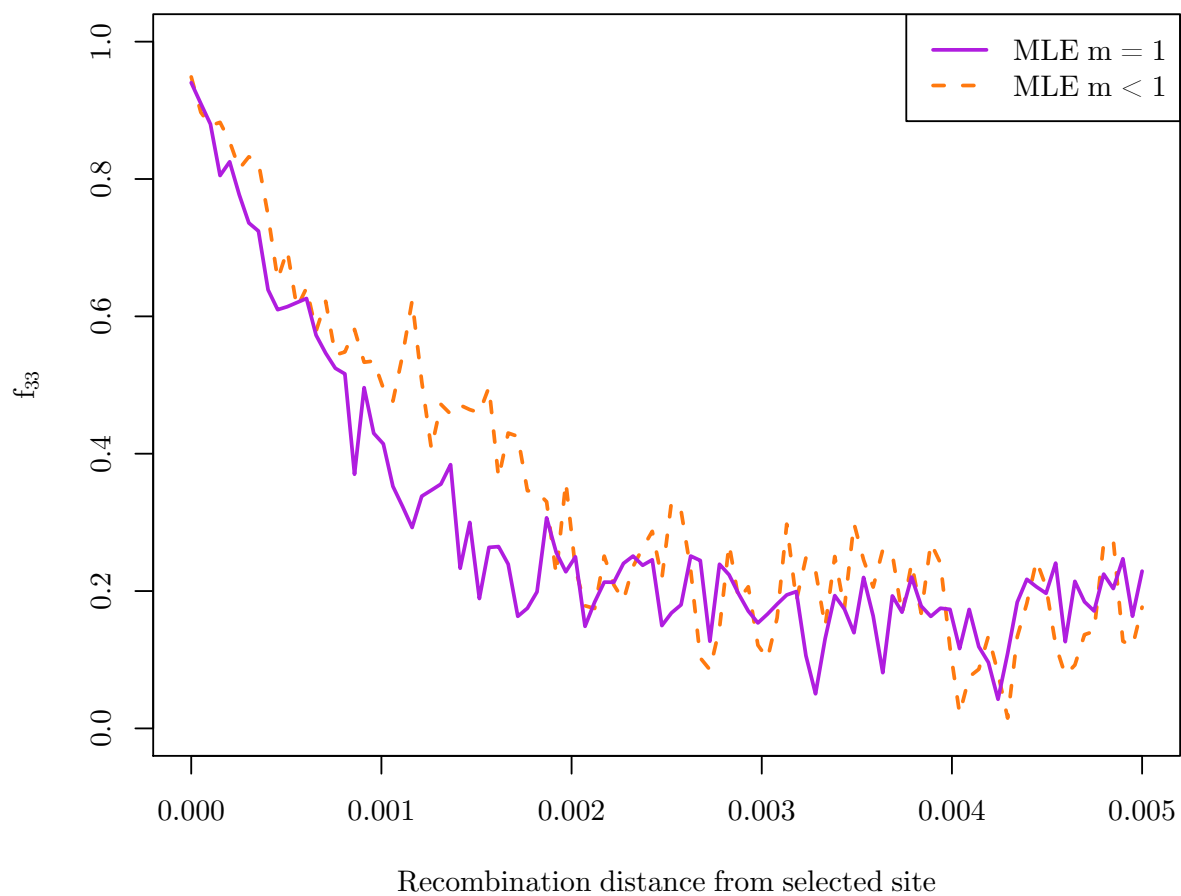

Figure S5: Coancestry coefficient for the recipient population as a function of recombination distance from the selected site, partitioned into simulations with MLE for  $m = 1$  and  $m < 1$  ( $s = 0.01$ ,  $m = 0.001$ ,  $N_e = 10,000$ ).



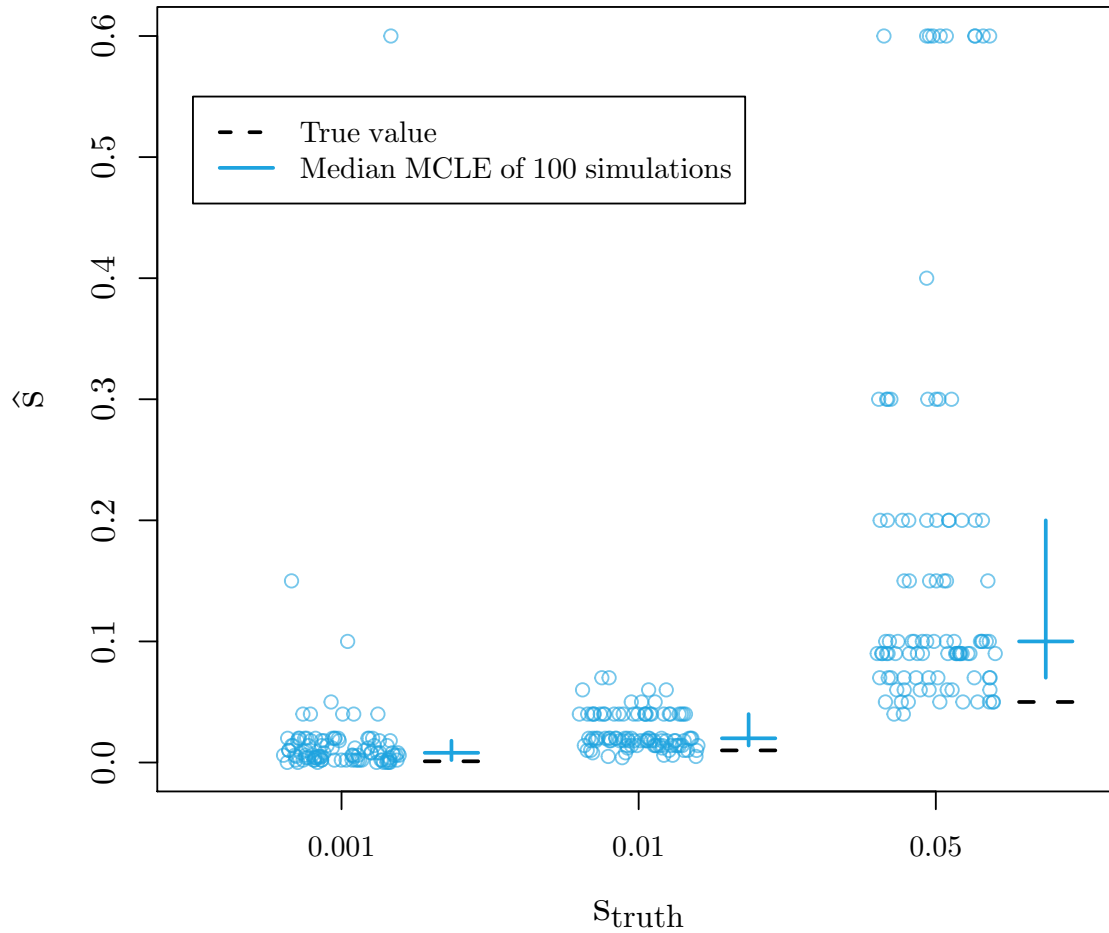

Figure S6: MCLE of **selection coefficients** for 100 simulations under **standing variant model** (10 chromosomes per population,  $N_e = 10,000$ ,  $t = 500$ ,  $g = 0.001$ ). We vary the true value of the parameter used for simulations along the x-axis and show the MCLE for each of 100 simulations (points). Crossbars indicate first and third quartiles with second quartiles (medians) as the horizontal line. The true values of the parameters are marked with dashed, black lines.

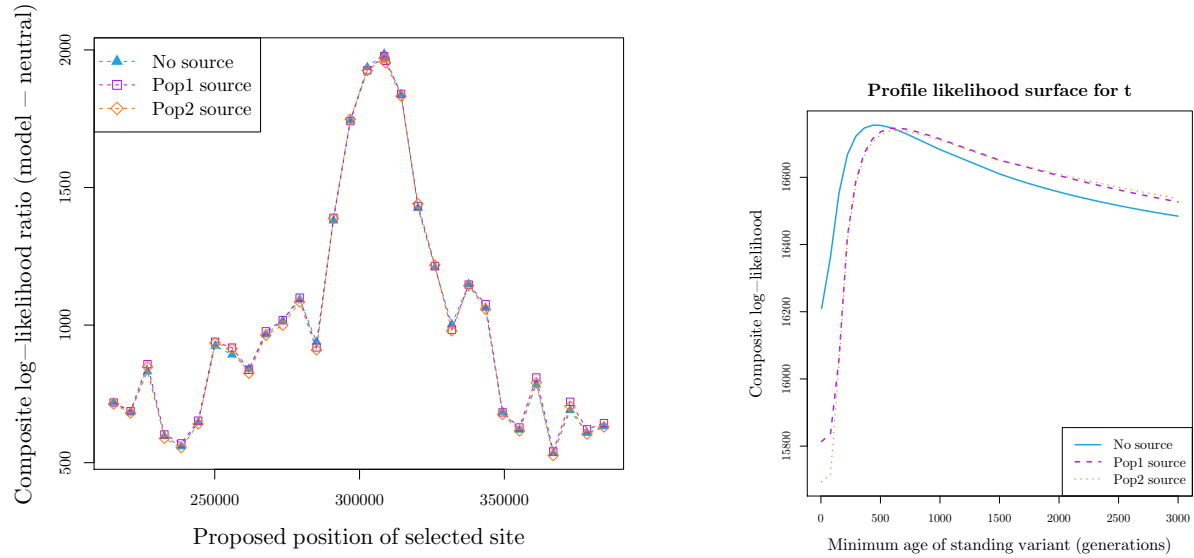

(a) Composite log-likelihood for standing variation model with no source specified and both selected populations as potential sources, as a function of the proposed selected site.

(b) Profile composite log-likelihood of the minimum age of the standing variant for standing variant model with no source specified and both selected populations as potential sources.

Figure S7: Inference results for standing variant model applied to *Mimulus* data using both original standing variant model and more complex model where a source population is specified. In this case, the composite log-likelihoods do not change, but the parameter estimates do. We obtain higher MLE for  $t$  when a source is specified (646 generations) compared to the original no source model (434 generations). This fits our expectation as  $t$  has slightly different interpretations under the two models.

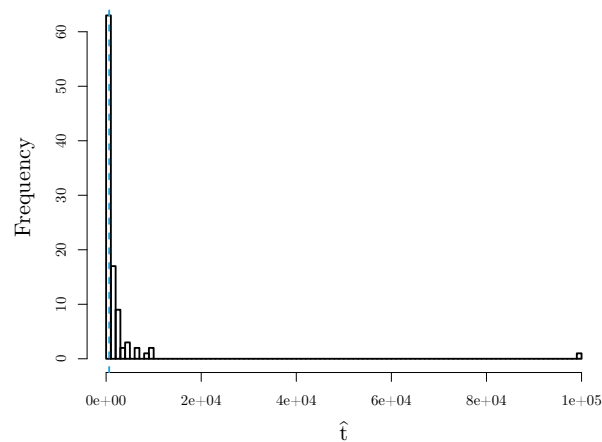

Figure S8: Histogram of MLE for minimum age of the standing variant ( $\hat{t}$ ) for 100 simulations under MLE of standing variation with source model for *Mimulus guttatus*. MLE from actual data is shown with dashed, blue line.

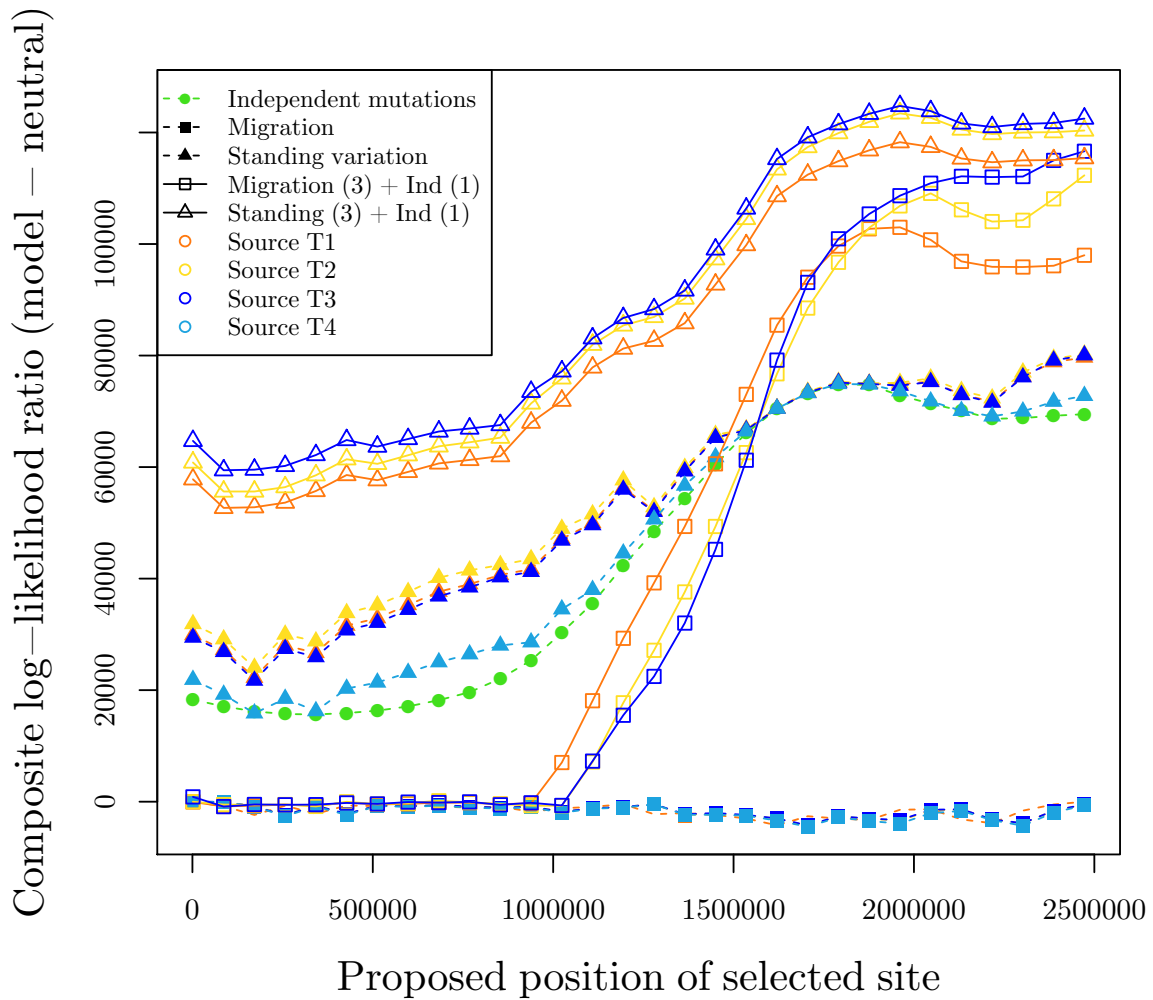

Figure S9: Composite log-likelihood for *Fundulus heteroclitus* pollutant tolerance adaptation on Scaffold9893, showing all possible sources for models with migration and standing variant model, as a function of the proposed selected site.

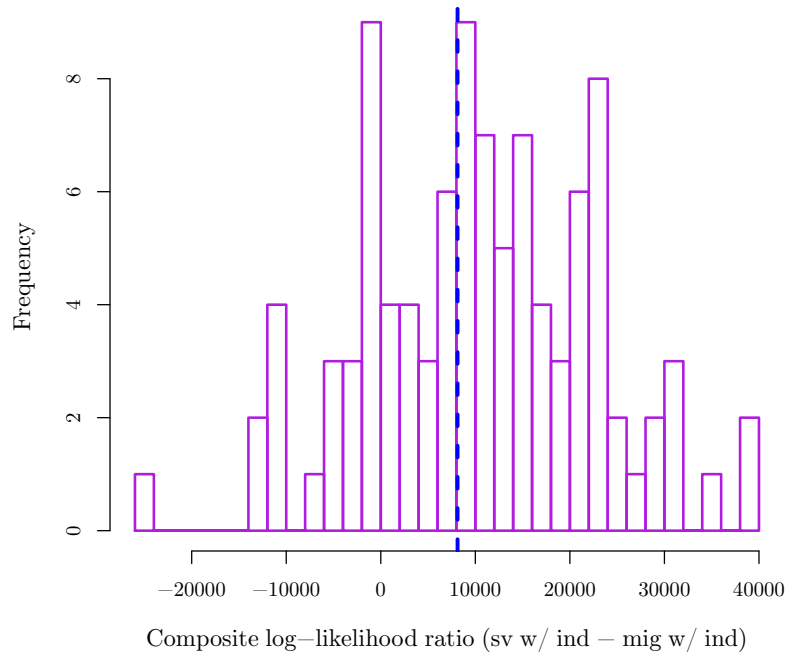

Figure S10: Histogram of composite log-likelihood ratio for 100 simulations under MCLE of migration in Northern tolerant populations and independent mutation in Southern tolerant populations for *Fundulus heteroclitus* (standing variation with T3 as source in Northern tolerant populations and independent mutation in Southern tolerant populations - migration in Northern tolerant populations and independent mutation in Southern tolerant populations). Observed value from actual data is shown with dashed, blue line.

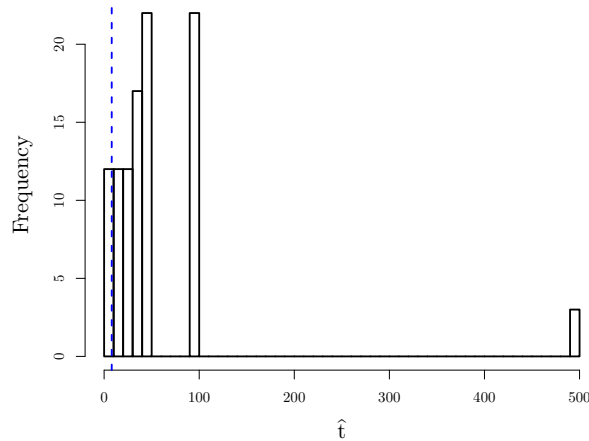

Figure S11: Histogram of MCLE for minimum age of the standing variant ( $\hat{t}$ ) for 100 simulations under MCLE of standing variation with T3 as source in Northern tolerant populations and independent mutation in Southern tolerant populations for *Fundulus heteroclitus*. MCLE from actual data is shown with dashed, blue line.

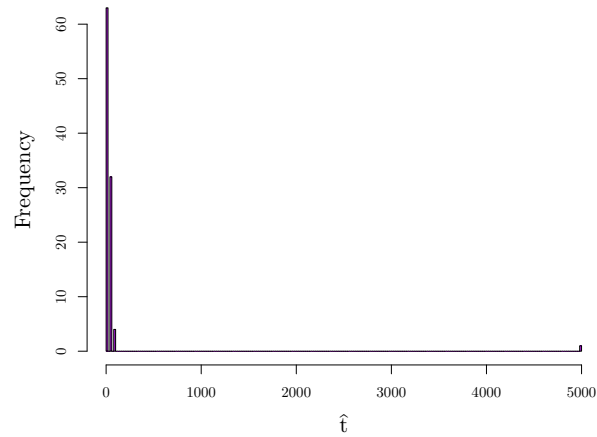

Figure S12: Histogram of MCLE for minimum age of the standing variant ( $\hat{t}$ ) for 100 simulations under MCLE of migration with T3 as source in Northern tolerant populations and independent mutation in Southern tolerant populations for *Fundulus heteroclitus*.

Table S1: Parameter spaces for composite-likelihood calculations for simulated datasets

|                             |                                                                                                                                                                                                                                                                                                                                                                  |
|-----------------------------|------------------------------------------------------------------------------------------------------------------------------------------------------------------------------------------------------------------------------------------------------------------------------------------------------------------------------------------------------------------|
| Position of selected site   | 0                                                                                                                                                                                                                                                                                                                                                                |
| $s$                         | $10^{-4}$ , $5 \times 10^{-4}$ , $10^{-3}$ , $2 \times 10^{-3}$ , $4 \times 10^{-3}$ , $5 \times 10^{-3}$ , $6 \times 10^{-3}$ , $8 \times 10^{-3}$ , 0.01, 0.012, 0.014, 0.018, 0.02, 0.03, 0.04, 0.05, 0.06, 0.07, 0.09, 0.1, 0.11, 0.12, 0.14, 0.15, 0.2, 0.25, 0.3, 0.35, 0.4, 0.5, 0.6                                                                      |
| $t$                         | 0, 5, 15, 25, 40, 50, 60, 75, 100, 150, 200, 250, 300, 350, 400, 450, 500, 550, 600, 650, 700, 750, 800, 900, 1000, 1200, 1500, 1800, 2000, 2500, 3000, 3500, 4000, 4500, 5000, 5500, 6000, 6500, 7000, 7500, 8000, 9000, $10^4$ , $1.5 \times 10^5$ , $2 \times 10^5$ , $3 \times 10^5$ , $5 \times 10^5$ , $7 \times 10^5$ , $9 \times 10^5$ , $10^5$ , $10^6$ |
| $g$                         | $10^{-3}$                                                                                                                                                                                                                                                                                                                                                        |
| $m$                         | $10^{-5}$ , $10^{-4}$ , $5 \times 10^{-4}$ , $10^{-3}$ , $5 \times 10^{-3}$ , 0.01, 0.2, 0.5, 0.9, 1                                                                                                                                                                                                                                                             |
| Migration source population | 2                                                                                                                                                                                                                                                                                                                                                                |

Table S2: Parameter spaces for composite-likelihood calculations for independent sweep model simulations

|                           |                                                                                                                                                                                                                                                                                                                                                                                                                                                                                                                                                                                                                                                                                                                                                                                                                                                                                                                                                                                                                                                                                                                                                                                                                                                                                                                                                                                                                                                                                                                                                                                                                                                                                                                                                                                                                                                                                                                                                                                                                                                                                                                                                                                                                                                                                                                                                                                                                                                                                                                                                                                                                                                                                                                                                                                                                                                                         |
|---------------------------|-------------------------------------------------------------------------------------------------------------------------------------------------------------------------------------------------------------------------------------------------------------------------------------------------------------------------------------------------------------------------------------------------------------------------------------------------------------------------------------------------------------------------------------------------------------------------------------------------------------------------------------------------------------------------------------------------------------------------------------------------------------------------------------------------------------------------------------------------------------------------------------------------------------------------------------------------------------------------------------------------------------------------------------------------------------------------------------------------------------------------------------------------------------------------------------------------------------------------------------------------------------------------------------------------------------------------------------------------------------------------------------------------------------------------------------------------------------------------------------------------------------------------------------------------------------------------------------------------------------------------------------------------------------------------------------------------------------------------------------------------------------------------------------------------------------------------------------------------------------------------------------------------------------------------------------------------------------------------------------------------------------------------------------------------------------------------------------------------------------------------------------------------------------------------------------------------------------------------------------------------------------------------------------------------------------------------------------------------------------------------------------------------------------------------------------------------------------------------------------------------------------------------------------------------------------------------------------------------------------------------------------------------------------------------------------------------------------------------------------------------------------------------------------------------------------------------------------------------------------------------|
| Position of selected site | 0                                                                                                                                                                                                                                                                                                                                                                                                                                                                                                                                                                                                                                                                                                                                                                                                                                                                                                                                                                                                                                                                                                                                                                                                                                                                                                                                                                                                                                                                                                                                                                                                                                                                                                                                                                                                                                                                                                                                                                                                                                                                                                                                                                                                                                                                                                                                                                                                                                                                                                                                                                                                                                                                                                                                                                                                                                                                       |
| <i>s</i>                  | $10^{-4}$ , $2 \times 10^{-4}$ , $3 \times 10^{-4}$ , $4 \times 10^{-4}$ , $5 \times 10^{-4}$ , $6 \times 10^{-4}$ , $7 \times 10^{-4}$ , $8 \times 10^{-4}$ , $9 \times 10^{-4}$ ,<br>0.001, 0.0015, 0.002, 0.0025, 0.003, 0.0035, 0.004, 0.0045, 0.005, 0.0055, 0.006, 0.0065,<br>0.007, 0.0075, 0.008, 0.0085, 0.009, 0.0095, 0.01, 0.0105, 0.011, 0.0115, 0.012, 0.0125,<br>0.013, 0.0135, 0.014, 0.0145, 0.015, 0.0155, 0.016, 0.0165, 0.017, 0.0175, 0.018,<br>0.0185, 0.019, 0.0195, 0.02, 0.0205, 0.021, 0.0215, 0.022, 0.0225, 0.023, 0.0235,<br>0.024, 0.0245, 0.025, 0.0255, 0.026, 0.0265, 0.027, 0.0275, 0.028, 0.0285, 0.029,<br>0.0295, 0.03, 0.0305, 0.031, 0.0315, 0.032, 0.0325, 0.033, 0.0335, 0.034, 0.0345,<br>0.035, 0.0355, 0.036, 0.0365, 0.037, 0.0375, 0.038, 0.0385, 0.039, 0.0395, 0.04,<br>0.0405, 0.041, 0.0415, 0.042, 0.0425, 0.043, 0.0435, 0.044, 0.0445, 0.045, 0.0455,<br>0.046, 0.0465, 0.047, 0.0475, 0.048, 0.0485, 0.049, 0.0495, 0.05, 0.0505, 0.051,<br>0.0515, 0.052, 0.0525, 0.053, 0.0535, 0.054, 0.0545, 0.055, 0.0555, 0.056, 0.0565,<br>0.057, 0.0575, 0.058, 0.0585, 0.059, 0.0595, 0.06, 0.0605, 0.061, 0.0615, 0.062,<br>0.0625, 0.063, 0.0635, 0.064, 0.0645, 0.065, 0.0655, 0.066, 0.0665, 0.067, 0.0675,<br>0.068, 0.0685, 0.069, 0.0695, 0.07, 0.0705, 0.071, 0.0715, 0.072, 0.0725, 0.073,<br>0.0735, 0.074, 0.0745, 0.075, 0.0755, 0.076, 0.0765, 0.077, 0.0775, 0.078, 0.0785,<br>0.079, 0.0795, 0.08, 0.0805, 0.081, 0.0815, 0.082, 0.0825, 0.083, 0.0835, 0.084,<br>0.0845, 0.085, 0.0855, 0.086, 0.0865, 0.087, 0.0875, 0.088, 0.0885, 0.089, 0.0895,<br>0.09, 0.0905, 0.091, 0.0915, 0.092, 0.0925, 0.093, 0.0935, 0.094, 0.0945, 0.095,<br>0.0955, 0.096, 0.0965, 0.097, 0.0975, 0.098, 0.0985, 0.099, 0.0995, 0.1, 0.1005,<br>0.101, 0.1015, 0.102, 0.1025, 0.103, 0.1035, 0.104, 0.1045, 0.105, 0.1055, 0.106,<br>0.1065, 0.107, 0.1075, 0.108, 0.1085, 0.109, 0.1095, 0.11, 0.1105, 0.111, 0.1115,<br>0.112, 0.1125, 0.113, 0.1135, 0.114, 0.1145, 0.115, 0.1155, 0.116, 0.1165, 0.117,<br>0.1175, 0.118, 0.1185, 0.119, 0.1195, 0.12, 0.1205, 0.121, 0.1215, 0.122, 0.1225,<br>0.123, 0.1235, 0.124, 0.1245, 0.125, 0.1255, 0.126, 0.1265, 0.127, 0.1275, 0.128,<br>0.1285, 0.129, 0.1295, 0.13, 0.1305, 0.131, 0.1315, 0.132, 0.1325, 0.133, 0.1335,<br>0.134, 0.1345, 0.135, 0.1355, 0.136, 0.1365, 0.137, 0.1375, 0.138, 0.1385, 0.139,<br>0.1395, 0.14, 0.1405, 0.141, 0.1415, 0.142, 0.1425, 0.143, 0.1435, 0.144, 0.1445,<br>0.145, 0.1455, 0.146, 0.1465, 0.147, 0.1475, 0.148, 0.1485, 0.149, 0.1495, 0.15,<br>0.16, 0.17, 0.18, 0.19, 0.2, 0.21, 0.22, 0.23, 0.24, 0.25, 0.26, 0.27, 0.28, 0.29, 0.3,<br>0.31, 0.32, 0.33, 0.34, 0.35, 0.36, 0.37, 0.38, 0.39, 0.4, 0.41, 0.42, 0.43, 0.44, 0.45,<br>0.46, 0.47, 0.48, 0.49, 0.5, 0.51, 0.52, 0.53, 0.54, 0.55, 0.56, 0.57, 0.58, 0.59, 0.6 |

Table S3: Parameter spaces for composite-likelihood calculations for independent sweep model simulations when position of selected site varies

|                           |                                                                                                                                                                                                                                                                                                                  |
|---------------------------|------------------------------------------------------------------------------------------------------------------------------------------------------------------------------------------------------------------------------------------------------------------------------------------------------------------|
| Position of selected site | 0, 0.01, 0.02, 0.04, 0.06, 0.08, 0.1, 0.12, 0.14, 0.16, 0.18, 0.2, 0.22, 0.24, 0.26,<br>0.28, 0.3, 0.32, 0.34, 0.36, 0.38, 0.4, 0.42, 0.44, 0.46, 0.48, 0.5, 0.52, 0.54, 0.56, 0.58,<br>0.6, 0.62, 0.64, 0.66, 0.68, 0.7, 0.72, 0.74, 0.76, 0.78, 0.8, 0.82, 0.84, 0.86, 0.88, 0.9,<br>0.92, 0.94, 0.96, 0.98, 1 |
| <i>s</i>                  | $10^{-4}$ , $5 \times 10^{-4}$ , 0.001, 0.002, 0.004, 0.005, 0.006, 0.008, 0.01, 0.012, 0.014,<br>0.018, 0.02, 0.03, 0.04, 0.05, 0.06, 0.07, 0.09, 0.1, 0.11, 0.12, 0.14, 0.15, 0.2, 0.25,<br>0.3, 0.35, 0.4, 0.5, 0.6                                                                                           |

Table S4: Parameter spaces for composite-likelihood calculations for migration model simulations

|                             |                                                                                                                                                                                                                                                                                                                                                                                                                                                                                                                                                                                                                                                                                             |
|-----------------------------|---------------------------------------------------------------------------------------------------------------------------------------------------------------------------------------------------------------------------------------------------------------------------------------------------------------------------------------------------------------------------------------------------------------------------------------------------------------------------------------------------------------------------------------------------------------------------------------------------------------------------------------------------------------------------------------------|
| Position of selected site   | 0                                                                                                                                                                                                                                                                                                                                                                                                                                                                                                                                                                                                                                                                                           |
| $s$                         | $10^{-4}$ , 0.001, 0.002, 0.003, 0.004, 0.005, 0.006, 0.007, 0.008, 0.009, 0.01, 0.011, 0.012, 0.013, 0.014, 0.015, 0.016, 0.018, 0.02, 0.022, 0.024, 0.026, 0.028, 0.03, 0.032, 0.034, 0.036, 0.038, 0.04, 0.042, 0.044, 0.046, 0.048, 0.05, 0.052, 0.054, 0.056, 0.058, 0.06, 0.062, 0.064, 0.066, 0.068, 0.07, 0.08, 0.09, 0.1, 0.11, 0.12, 0.13, 0.14, 0.15, 0.2, 0.3, 0.4, 0.5, 0.6                                                                                                                                                                                                                                                                                                    |
| $m$                         | $1^{-5}$ , $8 \times 10^{-5}$ , $0^{-4}$ , $1.2 \times 10^{-4}$ , $1.4 \times 10^{-4}$ , $1.6 \times 10^{-4}$ , $1.8 \times 10^{-4}$ , $2 \times 10^{-4}$ , $2.2 \times 10^{-4}$ , $2.4 \times 10^{-4}$ , $2.6 \times 10^{-4}$ , $2.8 \times 10^{-4}$ , $3 \times 10^{-4}$ , $3.2 \times 10^{-4}$ , $3.4 \times 10^{-4}$ , $3.6 \times 10^{-4}$ , $3.8 \times 10^{-4}$ , $4 \times 10^{-4}$ , $8 \times 10^{-4}$ , 0.001, 0.0012, 0.0014, 0.0016, 0.0018, 0.002, 0.0022, 0.0024, 0.0026, 0.0028, 0.003, 0.0032, 0.0034, 0.0036, 0.0038, 0.004, 0.006, 0.008, 0.01, 0.012, 0.014, 0.016, 0.036, 0.056, 0.076, 0.096, 0.116, 0.136, 0.156, 0.176, 0.196, 0.3, 0.4, 0.5, 0.6, 0.7, 0.8, 0.9, 1 |
| Migration source population | 2                                                                                                                                                                                                                                                                                                                                                                                                                                                                                                                                                                                                                                                                                           |

Table S5: Parameter spaces for composite-likelihood calculations for standing variation model simulations

|                           |                                                                                                                                                                                                                                                                  |
|---------------------------|------------------------------------------------------------------------------------------------------------------------------------------------------------------------------------------------------------------------------------------------------------------|
| Position of selected site | 0                                                                                                                                                                                                                                                                |
| $s$                       | $10^{-4}$ , 0.0020, 0.0040, 0.0050, 0.0060, 0.0080, 0.0100, 0.0120, 0.0140, 0.0180, 0.0200, 0.0400, 0.0500, 0.0600, 0.0700, 0.0900, 0.1000, 0.1500, 0.2000, 0.3000, 0.4000 0.5000 0.6000                                                                         |
| $t$                       | 5, 5, 25, 40, 50, 60, 75, 100, 150, 200, 250, 300, 350, 400, 450, 500, 550, 600, 650, 700, 750, 800, 900, 1000, 1500, 2000, 2500, 3000, 3500, 4000, 4500, 5000, 5500, 6000, 6500, 7000, 7500, 8000, 9000, 10000, 15000, 20000, 30000, 50000, 70000, 9000, $10^5$ |
| $g$                       | $10^{-6}$ , $10^{-5}$ , $10^{-4}$ , $10^{-3}$ , $10^{-2}$                                                                                                                                                                                                        |

Table S6: Neutral  $\mathbf{F}$  matrix from 12 scaffolds with no strong signatures of selection in *Mimulus guttatus* populations (Scaffold7 and regions adjacent to scaffolds 1, 4, 8, 47, 80, 84, 106, 115, 129, 148, 198). Populations 1 and 3 are copper tolerant.

|      | Pop1   | Pop2   | Pop3   | Pop4   |
|------|--------|--------|--------|--------|
| Pop1 | 0.1571 | 0.0266 | 0.0153 | 0.0356 |
| Pop2 | 0.0266 | 0.1008 | 0.0000 | 0.0204 |
| Pop3 | 0.0153 | 0.0000 | 0.1807 | 0.0179 |
| Pop4 | 0.0356 | 0.0204 | 0.0179 | 0.1232 |

Table S7: Parameter spaces for composite-likelihood calculations for *Mimulus*

|                           |                                                                                                                                                                                                                                                                                                               |
|---------------------------|---------------------------------------------------------------------------------------------------------------------------------------------------------------------------------------------------------------------------------------------------------------------------------------------------------------|
| Position of selected site | 215100, 220938, 226775, 232613, 238451, 244289, 250126, 255964, 261802, 267640, 273477, 279315, 285153, 290990, 296828, 302666, 308504, 309000, 314341, 320179, 326017, 331854, 337692, 343530, 349368, 355205, 361043                                                                                        |
| $s$                       | 0.001, 0.002, 0.003, 0.004, 0.005, 0.006, 0.007, 0.008, 0.009, 0.01, 0.011, 0.014, 0.016, 0.019, 0.021, 0.024, 0.026, 0.029, 0.032, 0.034, 0.037, 0.039, 0.042, 0.045, 0.047, 0.05, 0.052, 0.055, 0.057, 0.06, 0.08, 0.1, 0.15, 0.2, 0.25, 0.3, 0.35, 0.4, 0.45, 0.5, 0.55, 0.6                               |
| $t$                       | 5, 10, 81, 151, 222, 293, 364, 434, 505, 576, 646, 717, 788, 859, 929, 1000, 1500, 1607, 1714, 1821, 1929, 2036, 2143, 2250, 2357, 2464, 2571, 2679, 2786, 2893, 3000<br>(we include larger values 4000, 5000, 7000, 9000, $10^5$ , $10^7$ when calculating the likelihoods of parametric-bootstrap datasets) |
| $g$                       | $10^{-10}$ , $10^{-9}$ , $10^{-8}$ , $10^{-7}$ , $10^{-6}$ , $10^{-5}$ , $10^{-4}$ , $10^{-3}$ , $10^{-2}$                                                                                                                                                                                                    |
| $m$                       | $10^{-5}$ , $10^{-4}$ , $5^{-4}$ , 0.001, 0.005, 0.01, 0.1, 0.2, 0.3, 0.4, 0.5, 0.6, 0.7, 0.8, 0.9, 1                                                                                                                                                                                                         |
| Source population         | 1, 3                                                                                                                                                                                                                                                                                                          |

Table S8: Parametric-bootstrap results for *Mimulus* analysis

| Model                 | Range of CLR from 100 simulations<br>(standing source - simulation model) | Observed CLR |
|-----------------------|---------------------------------------------------------------------------|--------------|
| Neutral               | [-30.42, 145.04]                                                          | 1985.87      |
| Independent mutations | [-0.05, 88.02]                                                            | 436.21       |
| Migration             | [4.12, 749.45]                                                            | 945.95       |

Table S9: Neutral  $\mathbf{F}$  matrix from four scaffolds with no strong signatures of selection in *Fundulus heteroclitus* populations (Scaffold0, Scaffold1, Scaffold2, Scaffold3)

|    | S1    | T1    | S2    | T2    | S3    | T4    | S5    | T5    |
|----|-------|-------|-------|-------|-------|-------|-------|-------|
| S1 | 0.339 | 0.292 | 0.315 | 0.332 | 0.179 | 0.229 | 0.022 | 0.003 |
| T1 | 0.292 | 0.372 | 0.304 | 0.329 | 0.171 | 0.218 | 0.020 | 0.000 |
| S2 | 0.315 | 0.304 | 0.381 | 0.384 | 0.213 | 0.263 | 0.053 | 0.034 |
| T2 | 0.332 | 0.329 | 0.384 | 0.451 | 0.220 | 0.276 | 0.055 | 0.035 |
| S3 | 0.179 | 0.171 | 0.213 | 0.220 | 0.198 | 0.192 | 0.058 | 0.044 |
| T3 | 0.229 | 0.218 | 0.263 | 0.276 | 0.192 | 0.272 | 0.053 | 0.037 |
| S4 | 0.022 | 0.020 | 0.053 | 0.055 | 0.058 | 0.053 | 0.142 | 0.093 |
| T4 | 0.003 | 0.000 | 0.034 | 0.035 | 0.044 | 0.037 | 0.093 | 0.142 |



Table S10: Parameter spaces for composite-likelihood calculations for *Fundulus*

|                           |                                                                                                                                                                                                                                                               |
|---------------------------|---------------------------------------------------------------------------------------------------------------------------------------------------------------------------------------------------------------------------------------------------------------|
| Position of selected site | 1452, 86658, 171865, 257071, 342277, 427484, 512690, 597896, 683103, 768309, 853515, 938722, 1023928, 1109134, 1194341, 1279547, 1364754, 1449960, 1535166, 1620373, 1705579, 1790785, 1875992, 1961198, 2046404, 2131611, 2216817, 2302023, 2387230, 2472436 |
| $s$                       | 0.001, 0.005, 0.01, 0.02, 0.03, 0.04, 0.05, 0.06, 0.08, 0.1, 0.12, 0.14, 0.16, 0.18, 0.2, 0.3, 0.4, 0.5, 0.6                                                                                                                                                  |
| $t$                       | 0, 5, 50, 100, 500, 1000, 5000, $10^7$<br>(we include 2, 8, 10, 15, 20, 30, 35, 40 when trying to get a more accurate estimate of $\hat{t}$ under our standing (3) + ind (1) model)                                                                           |
| $g$                       | $10^{-10}$ , $10^{-9}$ , $10^{-8}$ , $10^{-7}$ , $10^{-6}$ , $10^{-5}$ , $10^{-4}$ , $10^{-3}$ , $10^{-2}$                                                                                                                                                    |
| $m$                       | $10^{-5}$ , $10^{-4}$ , $5^{-4}$ , 0.001, 0.005, 0.01, 0.1, 0.3, 0.5, 0.9, 1                                                                                                                                                                                  |
| Source population         | T1, T2, T3, T4                                                                                                                                                                                                                                                |

Table S11: Parametric-bootstrap results for *Fundulus* analysis

| <b>Model</b>                         | <b>Range of CLR from 100 simulations</b><br>(standing source w/ ind mutation model - simulation model) | <b>Observed CLR</b> |
|--------------------------------------|--------------------------------------------------------------------------------------------------------|---------------------|
| Neutral                              | [-5.74, 2133.35]                                                                                       | 124756.50           |
| Independent mutations                | [-54.84, 984.97]                                                                                       | 49891.11            |
| Migration                            | [-28393.81, 27274.27]                                                                                  | 124757.10           |
| Standing source                      | [-3040.37, 2536.41]                                                                                    | 44540.12            |
| Migration w/<br>independent mutation | [-24675.19, 38996.70]                                                                                  | 8120.52             |
